# Supplementary material for: Arbuscular Mycorrhiza Mediates Efficient Recycling From Soil to Plants of Nitrogen Bound in Chitin
Source: Front Microbiol. 2021 Feb 19;12:574060. doi: 10.3389/fmicb.2021.574060 (PMC7933022; doi:10.3389/fmicb.2021.574060)
Supplement: Supplementary Table 2 — Environmental conditions during Experiment 2. [file Table_2.XLSX]

## Sheet: meteodata
year	month	day	standard air temperature (daily mean)	standard air temperature (daily max)	standard air temperature (daily min)	direct sunshine (hours per day)	rainfall (mm per day)
2015	7	28	19.9	24.3	14.6	4.1	0.3
2015	7	29	16.2	23.7	13.3	4.5	0.3
2015	7	30	17.1	22.8	10.8	8.7	0
2015	7	31	18	23	9.4	10.4	0
2015	8	1	21.8	28.8	11.7	8.1	0
2015	8	2	21.4	25.9	18.8	1.3	0.2
2015	8	3	24.2	30.3	13.7	9.9	0
2015	8	4	27.6	35	17.8	11.7	0
2015	8	5	25.4	31.3	18.6	10.5	0
2015	8	6	28.6	36.1	17.8	12.3	0
2015	8	7	29.7	38.4	18.6	12.2	0
2015	8	8	31.4	38.2	21.5	11.5	0
2015	8	9	26.5	33.6	20.9	12.3	0
2015	8	10	28.2	36.8	18.7	12.1	0
2015	8	11	28.8	36.8	18.5	10.4	0
2015	8	12	27.8	35.7	19.3	9.1	0
2015	8	13	28.1	34.9	21.6	11	0
2015	8	14	29.4	37.3	21.2	9.4	0
2015	8	15	25.5	31.1	19.5	10.4	4.8
2015	8	16	21	28.1	18.2	1.9	12.9
2015	8	17	16.7	18.7	15.8	0	29.2
2015	8	18	15.2	16	14	0	12.5
2015	8	19	16	17.7	14.7	0	2.2
2015	8	20	17.4	21.9	13	2	0
2015	8	21	18.2	25	12.7	11.9	0
2015	8	22	17.6	24.8	9.7	7.6	0
2015	8	23	19	24.3	10.4	10	0
2015	8	24	22	27.3	16.6	8.8	1.5
2015	8	25	17.5	23.5	15.8	3.1	0.2
2015	8	26	20.1	27.4	11	12.3	0
2015	8	27	23.8	31.6	12.7	11.3	0
2015	8	28	24	29.8	18.5	0.8	0.1
2015	8	29	24.5	29.6	19	8.3	0
2015	8	30	25.7	33.1	17.3	12.5	0
2015	8	31	27.2	34.1	17.6	12	0
2015	9	1	25.2	33.7	19.3	8	7.2
2015	9	2	17	23	14.5	3.7	0.1
2015	9	3	17.1	22.9	12.1	6.1	0.7
2015	9	4	15.6	22.1	12.4	7	0

## Sheet: datalogger glasshouse
MBÚ měření 1	datum	čas	time	light intensity (lux)	1/s	°C	light intensity (lux)
2591	2015-07-28	06:06:31	0	8094	100	19.8	8094
2592	2015-07-28	06:21:31	0.010417	11886	100	21.2	11886
2593	2015-07-28	06:36:31	0.020834	11741	100	21.4	11741
2594	2015-07-28	06:51:31	0.031251	11969	99.9	22.2	11969
2595	2015-07-28	07:06:31	0.041668	12389	100	23.1	12389
2596	2015-07-28	07:21:31	0.052085	13780	100	23.8	13780
2597	2015-07-28	07:36:31	0.062502	12778	100	24	12778
2598	2015-07-28	07:51:31	0.072919	12863	100	24.2	12863
2599	2015-07-28	08:06:31	0.083336	14005	100	24.4	14005
2600	2015-07-28	08:21:31	0.093753	14330	100	24.8	14330
2601	2015-07-28	08:36:31	0.10417	15160	99.9	25.2	15160
2602	2015-07-28	08:51:31	0.114587	14409	100	25.6	14409
2603	2015-07-28	09:06:31	0.125004	15665	100	25.9	15665
2604	2015-07-28	09:21:31	0.135421	38307	100	29.7	38307
2605	2015-07-28	09:36:31	0.145838	18216	100	30.9	18216
2606	2015-07-28	09:51:31	0.156255	34838	100	31.9	34838
2607	2015-07-28	10:06:31	0.166672	20204	100	33.5	20204
2608	2015-07-28	10:21:31	0.177089	23202	100	31.9	23202
2609	2015-07-28	10:36:31	0.187506	49856	0.9	33	49856
2610	2015-07-28	10:51:31	0.197923	51648	0.9	34	51648
2611	2015-07-28	11:06:31	0.20834	39579	100	34.6	39579
2612	2015-07-28	11:21:31	0.218757	19454	100	32.9	19454
2613	2015-07-28	11:36:31	0.229174	9836	99.9	30.8	9836
2614	2015-07-28	11:51:31	0.239591	17053	100	31.6	17053
2615	2015-07-28	12:06:31	0.250008	9285	99.9	30.9	9285
2616	2015-07-28	12:21:31	0.260425	11396	100	30.8	11396
2617	2015-07-28	12:36:31	0.270842	54944	0.9	32.9	54944
2618	2015-07-28	12:51:31	0.281259	15043	100	33.6	15043
2619	2015-07-28	13:06:31	0.291676	17677	100	34.4	17677
2620	2015-07-28	13:21:31	0.302093	10594	100	32.6	10594
2621	2015-07-28	13:36:31	0.31251	15728	100	31	15728
2622	2015-07-28	13:51:31	0.322927	60282	0.9	32	60282
2623	2015-07-28	14:06:31	0.333344	14253	100	35.2	14253
2624	2015-07-28	14:21:31	0.343761	16833	100	36.2	16833
2625	2015-07-28	14:36:31	0.354178	23702	100	34.6	23702
2626	2015-07-28	14:51:31	0.364595	15999	100	32.8	15999
2627	2015-07-28	15:06:31	0.375012	17234	100	32.1	17234
2628	2015-07-28	15:21:31	0.385429	18304	100	31.9	18304
2629	2015-07-28	15:36:31	0.395846	17367	100	33.1	17367
2630	2015-07-28	15:51:31	0.406263	17923	100	33.9	17923
2631	2015-07-28	16:06:31	0.41668	15897	99.9	33.5	15897
2632	2015-07-28	16:21:31	0.427097	16140	100	32	16140
2633	2015-07-28	16:36:31	0.437514	13377	100	31.7	13377
2634	2015-07-28	16:51:31	0.447931	14915	99.9	31.2	14915
2635	2015-07-28	17:06:31	0.458348	13498	100	31.8	13498
2636	2015-07-28	17:21:31	0.468765	12647	100	31.1	12647
2637	2015-07-28	17:36:31	0.479182	11586	100	31.4	11586
2638	2015-07-28	17:51:31	0.489599	11021	100	30.9	11021
2639	2015-07-28	18:06:31	0.500016	12804	100.1	31.3	12804
2640	2015-07-28	18:21:31	0.510433	12981	100	31.2	12981
2641	2015-07-28	18:36:31	0.52085	11705	100	31	11705
2642	2015-07-28	18:51:31	0.531267	11125	100	30.8	11125
2643	2015-07-28	19:06:31	0.541684	10393	100	30.6	10393
2644	2015-07-28	19:21:31	0.552101	10654	100	30.2	10654
2645	2015-07-28	19:36:31	0.562518	9747	100	29.9	9747
2646	2015-07-28	19:51:31	0.572935	9546	100	29.4	9546
2647	2015-07-28	20:06:31	0.583352	546	0	28.7	546
2648	2015-07-28	20:21:31	0.593769	280	0	27.6	280
2649	2015-07-28	20:36:31	0.604186	119	0	27.2	119
2650	2015-07-28	20:51:31	0.614603	39	0	26.6	39
2651	2015-07-28	21:06:31	0.62502	8	0	26.2	8
2652	2015-07-28	21:21:31	0.635437	0	0	25.7	0
2653	2015-07-28	21:36:31	0.645854	0	0	25.3	0
2654	2015-07-28	21:51:31	0.656271	0	0	24.9	0
2655	2015-07-28	22:06:31	0.666688	0	0	24.6	0
2656	2015-07-28	22:21:31	0.677105	0	0	24.5	0
2657	2015-07-28	22:36:31	0.687522	0	0	24.3	0
2658	2015-07-28	22:51:31	0.697939	0	0	24	0
2659	2015-07-28	23:06:31	0.708356	0	0	23.7	0
2660	2015-07-28	23:21:31	0.718773	0	0	23.5	0
2661	2015-07-28	23:36:31	0.72919	0	0	23.4	0
2662	2015-07-28	23:51:31	0.739607	0	0	23.2	0
2663	2015-07-29	00:06:31	0.750024	0	0	23	0
2664	2015-07-29	00:21:31	0.760441	0	0	23	0
2665	2015-07-29	00:36:31	0.770858	0	0	22.8	0
2666	2015-07-29	00:51:31	0.781275	0	0	22.8	0
2667	2015-07-29	01:06:31	0.791692	0	0	22.6	0
2668	2015-07-29	01:21:31	0.802109	0	0	22.5	0
2669	2015-07-29	01:36:31	0.812526	0	0	22.3	0
2670	2015-07-29	01:51:31	0.822943	0	0	22.3	0
2671	2015-07-29	02:06:31	0.83336	0	0	22.2	0
2672	2015-07-29	02:21:31	0.843777	0	0	22.1	0
2673	2015-07-29	02:36:31	0.854194	0	0	22	0
2674	2015-07-29	02:51:31	0.864611	0	0	21.6	0
2675	2015-07-29	03:06:31	0.875028	0	0	21.3	0
2676	2015-07-29	03:21:31	0.885445	0	0	20.8	0
2677	2015-07-29	03:36:31	0.895862	0	0	20.4	0
2678	2015-07-29	03:51:31	0.906279	0	0	20.1	0
2679	2015-07-29	04:06:31	0.916696	0	0	19.9	0
2680	2015-07-29	04:21:31	0.927113	0	0	19.8	0
2681	2015-07-29	04:36:31	0.93753	0	0	19.8	0
2682	2015-07-29	04:51:31	0.947947	0	0	19.7	0
2683	2015-07-29	05:06:31	0.958364	4	0	19.8	4
2684	2015-07-29	05:21:31	0.968781	32	0	19.8	32
2685	2015-07-29	05:36:31	0.979198	64	0	19.8	64
2686	2015-07-29	05:51:31	0.989615	125	0	19.9	125
2687	2015-07-29	06:06:31	1.00003	6474	99.9	20.1	6474
2688	2015-07-29	06:21:31	1.01045	9948	100.1	22.5	9948
2689	2015-07-29	06:36:31	1.02087	10268	100	22.2	10268
2690	2015-07-29	06:51:31	1.03128	10866	100	22.7	10866
2691	2015-07-29	07:06:31	1.0417	11273	100	22.8	11273
2692	2015-07-29	07:21:31	1.05212	11274	100	24.2	11274
2693	2015-07-29	07:36:31	1.06253	12831	100	24.5	12831
2694	2015-07-29	07:51:31	1.07295	11805	100.1	26.3	11805
2695	2015-07-29	08:06:31	1.08337	11649	100	26.4	11649
2696	2015-07-29	08:21:31	1.09378	11887	100	27	11887
2697	2015-07-29	08:36:31	1.1042	13267	100	28.7	13267
2698	2015-07-29	08:51:31	1.11462	13386	100	30.4	13386
2699	2015-07-29	09:06:31	1.12504	13284	100.1	32.1	13284
2700	2015-07-29	09:21:31	1.13545	14322	100	32.7	14322
2701	2015-07-29	09:36:31	1.14587	14698	100	32.1	14698
2702	2015-07-29	09:51:31	1.15629	37217	99.9	33.2	37217
2703	2015-07-29	10:06:31	1.1667	28253	100	35.4	28253
2704	2015-07-29	10:21:31	1.17712	43620	99.9	33.3	43620
2705	2015-07-29	10:36:31	1.18754	17852	100	32.8	17852
2706	2015-07-29	10:51:31	1.19795	13571	100	34.6	13571
2707	2015-07-29	11:06:31	1.20837	14188	100	33.7	14188
2708	2015-07-29	11:21:31	1.21879	16529	100	34.1	16529
2709	2015-07-29	11:36:31	1.22921	16544	100	33.1	16544
2710	2015-07-29	11:51:31	1.23962	14089	100	32.8	14089
2711	2015-07-29	12:06:31	1.25004	23177	100	32.6	23177
2712	2015-07-29	12:21:31	1.26046	16799	100	32.3	16799
2713	2015-07-29	12:36:31	1.27087	15942	99.9	32.1	15942
2714	2015-07-29	12:51:31	1.28129	16975	100	33.1	16975
2715	2015-07-29	13:06:31	1.29171	18583	100	33.8	18583
2716	2015-07-29	13:21:31	1.30212	18925	100	34.2	18925
2717	2015-07-29	13:36:31	1.31254	20249	100	35.3	20249
2718	2015-07-29	13:51:31	1.32296	26176	100	35.3	26176
2719	2015-07-29	14:06:31	1.33338	19589	100	35.2	19589
2720	2015-07-29	14:21:31	1.34379	15035	100	34.4	15035
2721	2015-07-29	14:36:31	1.35421	58582	0.9	35.9	58582
2722	2015-07-29	14:51:31	1.36463	30728	100.1	33.8	30728
2723	2015-07-29	15:06:31	1.37504	17189	100	32.3	17189
2724	2015-07-29	15:21:31	1.38546	16877	100	32.2	16877
2725	2015-07-29	15:36:31	1.39588	11966	100	30.9	11966
2726	2015-07-29	15:51:31	1.40629	10382	100	29.9	10382
2727	2015-07-29	16:06:31	1.41671	10494	100	29	10494
2728	2015-07-29	16:21:31	1.42713	10891	100	29.3	10891
2729	2015-07-29	16:36:31	1.43755	12292	100	29.3	12292
2730	2015-07-29	16:51:31	1.44796	15122	100	29.8	15122
2731	2015-07-29	17:06:31	1.45838	12034	100	30.1	12034
2732	2015-07-29	17:21:31	1.4688	10566	100	29.6	10566
2733	2015-07-29	17:36:31	1.47921	10911	100	29	10911
2734	2015-07-29	17:51:31	1.48963	10600	100	28.8	10600
2735	2015-07-29	18:06:31	1.50005	9770	100.1	29	9770
2736	2015-07-29	18:21:31	1.51046	9597	100	29.4	9597
2737	2015-07-29	18:36:31	1.52088	9648	100	29.2	9648
2738	2015-07-29	18:51:31	1.5313	10022	100	28.8	10022
2739	2015-07-29	19:06:31	1.54172	9822	100	27.3	9822
2740	2015-07-29	19:21:31	1.55213	9243	100	28.1	9243
2741	2015-07-29	19:36:31	1.56255	9197	100	28.4	9197
2742	2015-07-29	19:51:31	1.57297	9555	100	25.9	9555
2743	2015-07-29	20:06:31	1.58338	997	787	25.4	997
2744	2015-07-29	20:21:31	1.5938	371	0	25.6	371
2745	2015-07-29	20:36:31	1.60422	184	0	25.2	184
2746	2015-07-29	20:51:31	1.61463	58	0	24.2	58
2747	2015-07-29	21:06:31	1.62505	9	0	23.3	9
2748	2015-07-29	21:21:31	1.63547	0	0	22.6	0
2749	2015-07-29	21:36:31	1.64589	0	0	22	0
2750	2015-07-29	21:51:31	1.6563	0	0	21.6	0
2751	2015-07-29	22:06:31	1.66672	0	0	21.2	0
2752	2015-07-29	22:21:31	1.67714	0	0	20.8	0
2753	2015-07-29	22:36:31	1.68755	0	0	20.7	0
2754	2015-07-29	22:51:31	1.69797	0	0	20.5	0
2755	2015-07-29	23:06:31	1.70839	0	0	20.1	0
2756	2015-07-29	23:21:31	1.7188	0	0	20	0
2757	2015-07-29	23:36:31	1.72922	0	0	19.6	0
2758	2015-07-29	23:51:31	1.73964	0	0	19.4	0
2759	2015-07-30	00:06:31	1.75006	0	0	19.2	0
2760	2015-07-30	00:21:31	1.76047	0	0	19.1	0
2761	2015-07-30	00:36:31	1.77089	0	0	18.9	0
2762	2015-07-30	00:51:31	1.78131	0	0	18.8	0
2763	2015-07-30	01:06:31	1.79172	0	0	18.6	0
2764	2015-07-30	01:21:31	1.80214	0	0	18.4	0
2765	2015-07-30	01:36:31	1.81256	0	0	18.3	0
2766	2015-07-30	01:51:31	1.82297	0	0	18.2	0
2767	2015-07-30	02:06:31	1.83339	0	0	17.9	0
2768	2015-07-30	02:21:31	1.84381	0	0	17.9	0
2769	2015-07-30	02:36:31	1.85423	0	0	17.7	0
2770	2015-07-30	02:51:31	1.86464	0	0	17.5	0
2771	2015-07-30	03:06:31	1.87506	0	0	17.6	0
2772	2015-07-30	03:21:31	1.88548	0	0	17.4	0
2773	2015-07-30	03:36:31	1.89589	0	0	17.3	0
2774	2015-07-30	03:51:31	1.90631	0	0	17.3	0
2775	2015-07-30	04:06:31	1.91673	0	0	17.1	0
2776	2015-07-30	04:21:31	1.92714	0	0	17	0
2777	2015-07-30	04:36:31	1.93756	0	0	16.9	0
2778	2015-07-30	04:51:31	1.94798	0	0	16.8	0
2779	2015-07-30	05:06:31	1.9584	5	0	16.7	5
2780	2015-07-30	05:21:31	1.96881	39	0	16.6	39
2781	2015-07-30	05:36:31	1.97923	141	0	16.5	141
2782	2015-07-30	05:51:31	1.98965	301	0	16.4	301
2783	2015-07-30	06:06:31	2.00006	7042	99.9	16.9	7042
2784	2015-07-30	06:21:31	2.01048	9988	100	19.3	9988
2785	2015-07-30	06:36:31	2.0209	10109	100	20.6	10109
2786	2015-07-30	06:51:31	2.03131	10429	100	21.4	10429
2787	2015-07-30	07:06:31	2.04173	10743	100	22.2	10743
2788	2015-07-30	07:21:31	2.05215	10622	100	23	10622
2789	2015-07-30	07:36:31	2.06257	10722	100	23.8	10722
2790	2015-07-30	07:51:31	2.07298	11103	100	24.6	11103
2791	2015-07-30	08:06:31	2.0834	11575	100.1	25.5	11575
2792	2015-07-30	08:21:31	2.09382	12068	100	28.2	12068
2793	2015-07-30	08:36:31	2.10423	12500	100	27.8	12500
2794	2015-07-30	08:51:31	2.11465	12707	100	30	12707
2795	2015-07-30	09:06:31	2.12507	13124	100.1	29.4	13124
2796	2015-07-30	09:21:31	2.13548	13956	100	31.8	13956
2797	2015-07-30	09:36:31	2.1459	14264	100	32.6	14264
2798	2015-07-30	09:51:31	2.15632	36852	100	32.7	36852
2799	2015-07-30	10:06:31	2.16674	41561	100	33.8	41561
2800	2015-07-30	10:21:31	2.17715	42685	100	34.3	42685
2801	2015-07-30	10:36:31	2.18757	15300	100	34.6	15300
2802	2015-07-30	10:51:31	2.19799	15852	100.1	35.4	15852
2803	2015-07-30	11:06:31	2.2084	15344	100	33.7	15344
2804	2015-07-30	11:21:31	2.21882	18434	100	33.7	18434
2805	2015-07-30	11:36:31	2.22924	15647	100	32	15647
2806	2015-07-30	11:51:31	2.23965	15171	100	31.2	15171
2807	2015-07-30	12:06:31	2.25007	14907	100	31.3	14907
2808	2015-07-30	12:21:31	2.26049	14917	100	30.6	14917
2809	2015-07-30	12:36:31	2.27091	48835	25.6	32.2	48835
2810	2015-07-30	12:51:31	2.28132	46664	0.8	31.7	46664
2811	2015-07-30	13:06:31	2.29174	22028	100	33.7	22028
2812	2015-07-30	13:21:31	2.30216	46238	99.7	36.2	46238
2813	2015-07-30	13:36:31	2.31257	14000	100	34	14000
2814	2015-07-30	13:51:31	2.32299	15286	100	33.4	15286
2815	2015-07-30	14:06:31	2.33341	61075	1.1	32.5	61075
2816	2015-07-30	14:21:31	2.34382	18994	100	33.3	18994
2817	2015-07-30	14:36:31	2.35424	15224	100	34.2	15224
2818	2015-07-30	14:51:31	2.36466	31449	100	32.8	31449
2819	2015-07-30	15:06:31	2.37508	14005	100	32.6	14005
2820	2015-07-30	15:21:31	2.38549	16259	100	32.2	16259
2821	2015-07-30	15:36:31	2.39591	18100	100	32.1	18100
2822	2015-07-30	15:51:31	2.40633	15160	100	33.2	15160
2823	2015-07-30	16:06:31	2.41674	16521	100.1	31.7	16521
2824	2015-07-30	16:21:31	2.42716	14227	100	31.7	14227
2825	2015-07-30	16:36:31	2.43758	13600	100	32.3	13600
2826	2015-07-30	16:51:31	2.44799	16545	100	31.3	16545
2827	2015-07-30	17:06:31	2.45841	23227	100	32.4	23227
2828	2015-07-30	17:21:31	2.46883	12866	100	33.6	12866
2829	2015-07-30	17:36:31	2.47925	11384	100	32	11384
2830	2015-07-30	17:51:31	2.48966	11870	100	31.4	11870
2831	2015-07-30	18:06:31	2.50008	11994	100.1	31.4	11994
2832	2015-07-30	18:21:31	2.5105	11667	100	30.7	11667
2833	2015-07-30	18:36:31	2.52091	12126	100	30.3	12126
2834	2015-07-30	18:51:31	2.53133	11292	100	30.1	11292
2835	2015-07-30	19:06:31	2.54175	10348	100.1	29.6	10348
2836	2015-07-30	19:21:31	2.55216	10456	100	29.1	10456
2837	2015-07-30	19:36:31	2.56258	10506	100	28.7	10506
2838	2015-07-30	19:51:31	2.573	10163	100	28.3	10163
2839	2015-07-30	20:06:31	2.58342	616	0	28.7	616
2840	2015-07-30	20:21:31	2.59383	354	0	27.6	354
2841	2015-07-30	20:36:31	2.60425	162	0	26.7	162
2842	2015-07-30	20:51:31	2.61467	48	0	26	48
2843	2015-07-30	21:06:31	2.62508	8	0	25.3	8
2844	2015-07-30	21:21:31	2.6355	0	0	24.5	0
2845	2015-07-30	21:36:31	2.64592	0	0	23.8	0
2846	2015-07-30	21:51:31	2.65633	0	0	23.4	0
2847	2015-07-30	22:06:31	2.66675	0	0	23	0
2848	2015-07-30	22:21:31	2.67717	0	0	22.8	0
2849	2015-07-30	22:36:31	2.68759	0	0	22.4	0
2850	2015-07-30	22:51:31	2.698	0	0	21.9	0
2851	2015-07-30	23:06:31	2.70842	0	0	21.6	0
2852	2015-07-30	23:21:31	2.71884	0	0	21.3	0
2853	2015-07-30	23:36:31	2.72925	0	0	21.1	0
2854	2015-07-30	23:51:31	2.73967	0	0	21	0
2855	2015-07-31	00:06:31	2.75009	0	0	20.7	0
2856	2015-07-31	00:21:31	2.7605	0	0	20.7	0
2857	2015-07-31	00:36:31	2.77092	0	0	20.6	0
2858	2015-07-31	00:51:31	2.78134	0	0	20.5	0
2859	2015-07-31	01:06:31	2.79176	0	0	20.2	0
2860	2015-07-31	01:21:31	2.80217	0	0	19.9	0
2861	2015-07-31	01:36:31	2.81259	0	0	19.8	0
2862	2015-07-31	01:51:31	2.82301	0	0	19.7	0
2863	2015-07-31	02:06:31	2.83342	0	0	19.5	0
2864	2015-07-31	02:21:31	2.84384	0	0	19.5	0
2865	2015-07-31	02:36:31	2.85426	0	0	19.4	0
2866	2015-07-31	02:51:31	2.86467	0	0	19.3	0
2867	2015-07-31	03:06:31	2.87509	0	0	19	0
2868	2015-07-31	03:21:31	2.88551	0	0	18.8	0
2869	2015-07-31	03:36:31	2.89593	0	0	18.8	0
2870	2015-07-31	03:51:31	2.90634	0	0	18.5	0
2871	2015-07-31	04:06:31	2.91676	0	0	18.4	0
2872	2015-07-31	04:21:31	2.92718	0	0	18.1	0
2873	2015-07-31	04:36:31	2.93759	0	0	17.8	0
2874	2015-07-31	04:51:31	2.94801	0	0	17.6	0
2875	2015-07-31	05:06:31	2.95843	4	0	17.3	4
2876	2015-07-31	05:21:31	2.96884	30	0	17.3	30
2877	2015-07-31	05:36:31	2.97926	113	0	17.2	113
2878	2015-07-31	05:51:31	2.98968	248	0	17.2	248
2879	2015-07-31	06:06:31	3.0001	6829	100.1	17.5	6829
2880	2015-07-31	06:21:31	3.01051	10124	100	20.1	10124
2881	2015-07-31	06:36:31	3.02093	10357	100	21.3	10357
2882	2015-07-31	06:51:31	3.03135	10354	100	22.2	10354
2883	2015-07-31	07:06:31	3.04176	10586	100	23.1	10586
2884	2015-07-31	07:21:31	3.05218	10917	100	23.3	10917
2885	2015-07-31	07:36:31	3.0626	10914	100	22.7	10914
2886	2015-07-31	07:51:31	3.07301	11241	100	23.7	11241
2887	2015-07-31	08:06:31	3.08343	11941	100	25.4	11941
2888	2015-07-31	08:21:31	3.09385	12738	100	28	12738
2889	2015-07-31	08:36:31	3.10427	13182	100	28.9	13182
2890	2015-07-31	08:51:31	3.11468	13622	100	29.8	13622
2891	2015-07-31	09:06:31	3.1251	13895	100.1	31.1	13895
2892	2015-07-31	09:21:31	3.13552	15074	100	32.6	15074
2893	2015-07-31	09:36:31	3.14593	15376	100	33.3	15376
2894	2015-07-31	09:51:31	3.15635	36810	100	33.8	36810
2895	2015-07-31	10:06:31	3.16677	37882	100	35.5	37882
2896	2015-07-31	10:21:31	3.17718	41470	100	34.5	41470
2897	2015-07-31	10:36:31	3.1876	17564	100	34.8	17564
2898	2015-07-31	10:51:31	3.19802	14684	100	34.4	14684
2899	2015-07-31	11:06:31	3.20844	17948	100	34	17948
2900	2015-07-31	11:21:31	3.21885	18511	100	35.1	18511
2901	2015-07-31	11:36:31	3.22927	20116	100	35.9	20116
2902	2015-07-31	11:51:31	3.23969	20380	100	34.8	20380
2903	2015-07-31	12:06:31	3.2501	23249	100	37.9	23249
2904	2015-07-31	12:21:31	3.26052	15074	100	34.4	15074
2905	2015-07-31	12:36:31	3.27094	44220	100	35.1	44220
2906	2015-07-31	12:51:31	3.28135	46447	9.2	35.9	46447
2907	2015-07-31	13:06:31	3.29177	24838	100	34.3	24838
2908	2015-07-31	13:21:31	3.30219	15892	100	36.5	15892
2909	2015-07-31	13:36:31	3.31261	53204	12.3	35.6	53204
2910	2015-07-31	13:51:31	3.32302	16177	100	35.2	16177
2911	2015-07-31	14:06:31	3.33344	14402	100	34.7	14402
2912	2015-07-31	14:21:31	3.34386	18496	100	34.2	18496
2913	2015-07-31	14:36:31	3.35427	14957	100	35.1	14957
2914	2015-07-31	14:51:31	3.36469	50352	0.9	34.4	50352
2915	2015-07-31	15:06:31	3.37511	18051	100	35.8	18051
2916	2015-07-31	15:21:31	3.38552	15496	100	36	15496
2917	2015-07-31	15:36:31	3.39594	15892	100	36.5	15892
2918	2015-07-31	15:51:31	3.40636	15142	100	35.8	15142
2919	2015-07-31	16:06:31	3.41678	14030	100	35.1	14030
2920	2015-07-31	16:21:31	3.42719	12804	100	33.7	12804
2921	2015-07-31	16:36:31	3.43761	33135	100	33	33135
2922	2015-07-31	16:51:31	3.44803	14122	100	32.7	14122
2923	2015-07-31	17:06:31	3.45844	28021	100	33	28021
2924	2015-07-31	17:21:31	3.46886	12911	100	34.5	12911
2925	2015-07-31	17:36:31	3.47928	23770	99.9	33.6	23770
2926	2015-07-31	17:51:31	3.48969	11647	100	32.6	11647
2927	2015-07-31	18:06:31	3.50011	11375	100.1	32.4	11375
2928	2015-07-31	18:21:31	3.51053	10834	100	31.7	10834
2929	2015-07-31	18:36:31	3.52095	10969	100	31	10969
2930	2015-07-31	18:51:31	3.53136	10759	100	30.2	10759
2931	2015-07-31	19:06:31	3.54178	10433	100	29.6	10433
2932	2015-07-31	19:21:31	3.5522	10317	100	29.3	10317
2933	2015-07-31	19:36:31	3.56261	10275	100.1	29	10275
2934	2015-07-31	19:51:31	3.57303	9993	100	28.7	9993
2935	2015-07-31	20:06:31	3.58345	547	0	27.8	547
2936	2015-07-31	20:21:31	3.59386	337	0	26.6	337
2937	2015-07-31	20:36:31	3.60428	160	0	25.9	160
2938	2015-07-31	20:51:31	3.6147	47	0	25.6	47
2939	2015-07-31	21:06:31	3.62512	6	0	24.9	6
2940	2015-07-31	21:21:31	3.63553	0	0	24.4	0
2941	2015-07-31	21:36:31	3.64595	0	0	23.9	0
2942	2015-07-31	21:51:31	3.65637	0	0	23.6	0
2943	2015-07-31	22:06:31	3.66678	0	0	23.2	0
2944	2015-07-31	22:21:31	3.6772	0	0	22.9	0
2945	2015-07-31	22:36:31	3.68762	0	0	22.6	0
2946	2015-07-31	22:51:31	3.69803	0	0	22.3	0
2947	2015-07-31	23:06:31	3.70845	0	0	22	0
2948	2015-07-31	23:21:31	3.71887	0	0	21.6	0
2949	2015-07-31	23:36:31	3.72929	0	0	21.4	0
2950	2015-07-31	23:51:31	3.7397	0	0	21.2	0
2951	2015-08-01	00:06:31	3.75012	0	0	21.1	0
2952	2015-08-01	00:21:31	3.76054	0	0	20.8	0
2953	2015-08-01	00:36:31	3.77095	0	0	20.6	0
2954	2015-08-01	00:51:31	3.78137	0	0	20.4	0
2955	2015-08-01	01:06:31	3.79179	0	0	20.2	0
2956	2015-08-01	01:21:31	3.8022	0	0	19.9	0
2957	2015-08-01	01:36:31	3.81262	0	0	19.9	0
2958	2015-08-01	01:51:31	3.82304	0	0	19.6	0
2959	2015-08-01	02:06:31	3.83346	0	0	19.5	0
2960	2015-08-01	02:21:31	3.84387	0	0	19.4	0
2961	2015-08-01	02:36:31	3.85429	0	0	19.4	0
2962	2015-08-01	02:51:31	3.86471	0	0	19.3	0
2963	2015-08-01	03:06:31	3.87512	0	0	19.1	0
2964	2015-08-01	03:21:31	3.88554	0	0	19.1	0
2965	2015-08-01	03:36:31	3.89596	0	0	19	0
2966	2015-08-01	03:51:31	3.90637	0	0	19	0
2967	2015-08-01	04:06:31	3.91679	0	0	18.8	0
2968	2015-08-01	04:21:31	3.92721	0	0	18.6	0
2969	2015-08-01	04:36:31	3.93763	0	0	18.4	0
2970	2015-08-01	04:51:31	3.94804	0	0	18.3	0
2971	2015-08-01	05:06:31	3.95846	2	0	18.2	2
2972	2015-08-01	05:21:31	3.96888	25	0	18.1	25
2973	2015-08-01	05:36:31	3.97929	76	0	17.9	76
2974	2015-08-01	05:51:31	3.98971	172	0	17.8	172
2975	2015-08-01	06:06:31	4.00013	7012	100	17.9	7012
2976	2015-08-01	06:21:31	4.01054	10237	100	20.2	10237
2977	2015-08-01	06:36:31	4.02096	10451	100	21.8	10451
2978	2015-08-01	06:51:31	4.03138	11393	100	22.7	11393
2979	2015-08-01	07:06:31	4.0418	11363	100.1	23.7	11363
2980	2015-08-01	07:21:31	4.05221	12163	100	24.5	12163
2981	2015-08-01	07:36:31	4.06263	12466	100	25.4	12466
2982	2015-08-01	07:51:31	4.07305	12045	100	25.6	12045
2983	2015-08-01	08:06:31	4.08346	11494	100	26.4	11494
2984	2015-08-01	08:21:31	4.09388	12728	100	27.7	12728
2985	2015-08-01	08:36:31	4.1043	13009	100	27.9	13009
2986	2015-08-01	08:51:31	4.11471	13529	100	29	13529
2987	2015-08-01	09:06:31	4.12513	14246	100	30.9	14246
2988	2015-08-01	09:21:31	4.13555	16955	100.1	32.2	16955
2989	2015-08-01	09:36:31	4.14597	15469	100	33	15469
2990	2015-08-01	09:51:31	4.15638	37798	100	34.5	37798
2991	2015-08-01	10:06:31	4.1668	41253	100	35.8	41253
2992	2015-08-01	10:21:31	4.17722	39739	100	35.4	39739
2993	2015-08-01	10:36:31	4.18763	15928	100	34.9	15928
2994	2015-08-01	10:51:31	4.19805	17690	100	35	17690
2995	2015-08-01	11:06:31	4.20847	15834	100	34.4	15834
2996	2015-08-01	11:21:31	4.21888	17242	100	35.6	17242
2997	2015-08-01	11:36:31	4.2293	18561	100	34.6	18561
2998	2015-08-01	11:51:31	4.23972	22113	100	35.2	22113
2999	2015-08-01	12:06:31	4.25014	24068	100	36.3	24068
3000	2015-08-01	12:21:31	4.26055	20422	100	37	20422
3001	2015-08-01	12:36:31	4.27097	26777	100	36.8	26777
3002	2015-08-01	12:51:31	4.28139	24622	100	36.8	24622
3003	2015-08-01	13:06:31	4.2918	21860	100	36.1	21860
3004	2015-08-01	13:21:31	4.30222	29649	100	36.1	29649
3005	2015-08-01	13:36:31	4.31264	36042	100	36	36042
3006	2015-08-01	13:51:31	4.32305	47046	0.9	37.9	47046
3007	2015-08-01	14:06:31	4.33347	27847	100	38.6	27847
3008	2015-08-01	14:21:31	4.34389	20060	99.9	38.2	20060
3009	2015-08-01	14:36:31	4.35431	27070	100	37.9	27070
3010	2015-08-01	14:51:31	4.36472	19116	100	36.5	19116
3011	2015-08-01	15:06:31	4.37514	22290	100	35.7	22290
3012	2015-08-01	15:21:31	4.38556	18553	99.9	34.8	18553
3013	2015-08-01	15:36:31	4.39597	18650	100	35.1	18650
3014	2015-08-01	15:51:31	4.40639	17020	100	34.9	17020
3015	2015-08-01	16:06:31	4.41681	17859	100	35.2	17859
3016	2015-08-01	16:21:31	4.42722	7361	100	34.4	7361
3017	2015-08-01	16:36:31	4.43764	33983	100	35.2	33983
3018	2015-08-01	16:51:31	4.44806	14654	100	35.3	14654
3019	2015-08-01	17:06:31	4.45848	18748	100.1	35.1	18748
3020	2015-08-01	17:21:31	4.46889	13126	100	34.6	13126
3021	2015-08-01	17:36:31	4.47931	12863	100	33.5	12863
3022	2015-08-01	17:51:31	4.48973	12821	100	32.6	12821
3023	2015-08-01	18:06:31	4.50014	12617	100	32.2	12617
3024	2015-08-01	18:21:31	4.51056	10773	100	31.8	10773
3025	2015-08-01	18:36:31	4.52098	9759	100	32.1	9759
3026	2015-08-01	18:51:31	4.53139	9839	100	32.2	9839
3027	2015-08-01	19:06:31	4.54181	9821	100	32	9821
3028	2015-08-01	19:21:31	4.55223	9733	100	31.7	9733
3029	2015-08-01	19:36:31	4.56265	10165	100	31.7	10165
3030	2015-08-01	19:51:31	4.57306	10055	100	31.5	10055
3031	2015-08-01	20:06:31	4.58348	403	0	30.5	403
3032	2015-08-01	20:21:31	4.5939	77	0	29.4	77
3033	2015-08-01	20:36:31	4.60431	27	0	28.5	27
3034	2015-08-01	20:51:31	4.61473	7	0	28.1	7
3035	2015-08-01	21:06:31	4.62515	0	0	27.8	0
3036	2015-08-01	21:21:31	4.63556	0	0	27.4	0
3037	2015-08-01	21:36:31	4.64598	0	0	27.1	0
3038	2015-08-01	21:51:31	4.6564	0	0	26.8	0
3039	2015-08-01	22:06:31	4.66682	0	0	26.7	0
3040	2015-08-01	22:21:31	4.67723	0	0	26.6	0
3041	2015-08-01	22:36:31	4.68765	0	0	26.5	0
3042	2015-08-01	22:51:31	4.69807	0	0	26.4	0
3043	2015-08-01	23:06:31	4.70848	0	0	26.2	0
3044	2015-08-01	23:21:31	4.7189	0	0	26	0
3045	2015-08-01	23:36:31	4.72932	0	0	25.8	0
3046	2015-08-01	23:51:31	4.73973	0	0	25.8	0
3047	2015-08-02	00:06:31	4.75015	0	0	25.6	0
3048	2015-08-02	00:21:31	4.76057	0	0	25.5	0
3049	2015-08-02	00:36:31	4.77099	0	0	25.4	0
3050	2015-08-02	00:51:31	4.7814	0	0	25.2	0
3051	2015-08-02	01:06:31	4.79182	0	0	25.2	0
3052	2015-08-02	01:21:31	4.80224	0	0	25	0
3053	2015-08-02	01:36:31	4.81265	0	0	24.9	0
3054	2015-08-02	01:51:31	4.82307	0	0	25	0
3055	2015-08-02	02:06:31	4.83349	0	0	24.8	0
3056	2015-08-02	02:21:31	4.8439	0	0	24.8	0
3057	2015-08-02	02:36:31	4.85432	0	0	24.7	0
3058	2015-08-02	02:51:31	4.86474	0	0	24.6	0
3059	2015-08-02	03:06:31	4.87516	0	0	24.4	0
3060	2015-08-02	03:21:31	4.88557	0	0	24.4	0
3061	2015-08-02	03:36:31	4.89599	0	0	24.3	0
3062	2015-08-02	03:51:31	4.90641	0	0	24.2	0
3063	2015-08-02	04:06:31	4.91682	0	0	24	0
3064	2015-08-02	04:21:31	4.92724	0	0	24	0
3065	2015-08-02	04:36:31	4.93766	0	0	23.8	0
3066	2015-08-02	04:51:31	4.94808	0	0	23.7	0
3067	2015-08-02	05:06:31	4.95849	1	0	23.6	1
3068	2015-08-02	05:21:31	4.96891	15	0	23.4	15
3069	2015-08-02	05:36:31	4.97933	60	0	23.4	60
3070	2015-08-02	05:51:31	4.98974	229	0	23.3	229
3071	2015-08-02	06:06:31	5.00016	7126	100	23.4	7126
3072	2015-08-02	06:21:31	5.01058	10453	100	25.9	10453
3073	2015-08-02	06:36:31	5.02099	10608	100	27.4	10608
3074	2015-08-02	06:51:31	5.03141	10589	100	27.6	10589
3075	2015-08-02	07:06:31	5.04183	10995	100	26.6	10995
3076	2015-08-02	07:21:31	5.05225	11438	100	26.7	11438
3077	2015-08-02	07:36:31	5.06266	11331	100	27.3	11331
3078	2015-08-02	07:51:31	5.07308	11357	100	27.5	11357
3079	2015-08-02	08:06:31	5.0835	11514	100.1	28.1	11514
3080	2015-08-02	08:21:31	5.09391	11549	100	28.2	11549
3081	2015-08-02	08:36:31	5.10433	11545	100	28.6	11545
3082	2015-08-02	08:51:31	5.11475	11920	100	28.6	11920
3083	2015-08-02	09:06:31	5.12516	13099	100	29	13099
3084	2015-08-02	09:21:31	5.13558	13676	100	29.5	13676
3085	2015-08-02	09:36:31	5.146	12968	100	30	12968
3086	2015-08-02	09:51:31	5.15642	13325	100	30.3	13325
3087	2015-08-02	10:06:31	5.16683	14160	100	30.6	14160
3088	2015-08-02	10:21:31	5.17725	14596	100	31.2	14596
3089	2015-08-02	10:36:31	5.18767	14650	100	31.5	14650
3090	2015-08-02	10:51:31	5.19808	14192	100	31.9	14192
3091	2015-08-02	11:06:31	5.2085	14406	100	32.2	14406
3092	2015-08-02	11:21:31	5.21892	15830	100	32.3	15830
3093	2015-08-02	11:36:31	5.22933	18661	100	33.2	18661
3094	2015-08-02	11:51:31	5.23975	20017	100	34.5	20017
3095	2015-08-02	12:06:31	5.25017	21359	100	36.3	21359
3096	2015-08-02	12:21:31	5.26059	16241	100.1	34.2	16241
3097	2015-08-02	12:36:31	5.271	19017	100	33.2	19017
3098	2015-08-02	12:51:31	5.28142	16753	100	27.7	16753
3099	2015-08-02	13:06:31	5.29184	16108	100	31	16108
3100	2015-08-02	13:21:31	5.30225	16242	100	31.7	16242
3101	2015-08-02	13:36:31	5.31267	17668	100	32.3	17668
3102	2015-08-02	13:51:31	5.32309	20273	100	33	20273
3103	2015-08-02	14:06:31	5.3335	23654	100	35.2	23654
3104	2015-08-02	14:21:31	5.34392	24288	100	35.5	24288
3105	2015-08-02	14:36:31	5.35434	21960	100	34.7	21960
3106	2015-08-02	14:51:31	5.36476	21032	100	33.9	21032
3107	2015-08-02	15:06:31	5.37517	20065	100	34.1	20065
3108	2015-08-02	15:21:31	5.38559	17386	100	33.7	17386
3109	2015-08-02	15:36:31	5.39601	14647	100	32.5	14647
3110	2015-08-02	15:51:31	5.40642	14332	100	31.7	14332
3111	2015-08-02	16:06:31	5.41684	13961	100	32.3	13961
3112	2015-08-02	16:21:31	5.42726	13289	100	32.2	13289
3113	2015-08-02	16:36:31	5.43767	12552	100	31.5	12552
3114	2015-08-02	16:51:31	5.44809	12061	100	31	12061
3115	2015-08-02	17:06:31	5.45851	11843	100	30.5	11843
3116	2015-08-02	17:21:31	5.46893	12335	100	30	12335
3117	2015-08-02	17:36:31	5.47934	12379	100	29.7	12379
3118	2015-08-02	17:51:31	5.48976	12132	100	29.6	12132
3119	2015-08-02	18:06:31	5.50018	12077	100	29.7	12077
3120	2015-08-02	18:21:31	5.51059	12276	100	29.7	12276
3121	2015-08-02	18:36:31	5.52101	11641	100	30	11641
3122	2015-08-02	18:51:31	5.53143	11152	100	30.2	11152
3123	2015-08-02	19:06:31	5.54184	11127	100.1	30.2	11127
3124	2015-08-02	19:21:31	5.55226	10296	100	30.2	10296
3125	2015-08-02	19:36:31	5.56268	9954	100	30	9954
3126	2015-08-02	19:51:31	5.5731	9857	100	29.8	9857
3127	2015-08-02	20:06:31	5.58351	545	0	29	545
3128	2015-08-02	20:21:31	5.59393	274	0	27.8	274
3129	2015-08-02	20:36:31	5.60435	109	0	27.5	109
3130	2015-08-02	20:51:31	5.61476	19	0	27.2	19
3131	2015-08-02	21:06:31	5.62518	2	0	26.9	2
3132	2015-08-02	21:21:31	5.6356	0	0	26.6	0
3133	2015-08-02	21:36:31	5.64601	0	0	26.3	0
3134	2015-08-02	21:51:31	5.65643	0	0	26.2	0
3135	2015-08-02	22:06:31	5.66685	0	0	25.9	0
3136	2015-08-02	22:21:31	5.67727	0	0	25.7	0
3137	2015-08-02	22:36:31	5.68768	0	0	25.3	0
3138	2015-08-02	22:51:31	5.6981	0	0	25.2	0
3139	2015-08-02	23:06:31	5.70852	0	0	25	0
3140	2015-08-02	23:21:31	5.71893	0	0	24.7	0
3141	2015-08-02	23:36:31	5.72935	0	0	24.7	0
3142	2015-08-02	23:51:31	5.73977	0	0	24.4	0
3143	2015-08-03	00:06:31	5.75018	0	0	24.4	0
3144	2015-08-03	00:21:31	5.7606	0	0	24.2	0
3145	2015-08-03	00:36:31	5.77102	0	0	24	0
3146	2015-08-03	00:51:31	5.78144	0	0	23.9	0
3147	2015-08-03	01:06:31	5.79185	0	0	23.7	0
3148	2015-08-03	01:21:31	5.80227	0	0	23.6	0
3149	2015-08-03	01:36:31	5.81269	0	0	23.5	0
3150	2015-08-03	01:51:31	5.8231	0	0	23.4	0
3151	2015-08-03	02:06:31	5.83352	0	0	23.2	0
3152	2015-08-03	02:21:31	5.84394	0	0	23	0
3153	2015-08-03	02:36:31	5.85435	0	0	22.7	0
3154	2015-08-03	02:51:31	5.86477	0	0	22.4	0
3155	2015-08-03	03:06:31	5.87519	0	0	22.3	0
3156	2015-08-03	03:21:31	5.88561	0	0	22	0
3157	2015-08-03	03:36:31	5.89602	0	0	21.8	0
3158	2015-08-03	03:51:31	5.90644	0	0	21.5	0
3159	2015-08-03	04:06:31	5.91686	0	0	21.4	0
3160	2015-08-03	04:21:31	5.92727	0	0	21.3	0
3161	2015-08-03	04:36:31	5.93769	0	0	21.1	0
3162	2015-08-03	04:51:31	5.94811	0	0	20.9	0
3163	2015-08-03	05:06:31	5.95852	2	0	20.8	2
3164	2015-08-03	05:21:31	5.96894	21	0	20.6	21
3165	2015-08-03	05:36:31	5.97936	99	0	20.5	99
3166	2015-08-03	05:51:31	5.98978	257	0	20.4	257
3167	2015-08-03	06:06:31	6.00019	6861	100	20.5	6861
3168	2015-08-03	06:21:31	6.01061	10037	100	22.9	10037
3169	2015-08-03	06:36:31	6.02103	10161	100	24.2	10161
3170	2015-08-03	06:51:31	6.03144	10381	100	23.1	10381
3171	2015-08-03	07:06:31	6.04186	10521	100	24.3	10521
3172	2015-08-03	07:21:31	6.05228	10671	100	24.9	10671
3173	2015-08-03	07:36:31	6.06269	10782	99.9	25.6	10782
3174	2015-08-03	07:51:31	6.07311	11180	100	26.6	11180
3175	2015-08-03	08:06:31	6.08353	11766	100.1	28.3	11766
3176	2015-08-03	08:21:31	6.09395	12396	100	29	12396
3177	2015-08-03	08:36:31	6.10436	13182	100	30.7	13182
3178	2015-08-03	08:51:31	6.11478	13498	99.9	31.7	13498
3179	2015-08-03	09:06:31	6.1252	14047	100	33.1	14047
3180	2015-08-03	09:21:31	6.13561	14892	100	34.4	14892
3181	2015-08-03	09:36:31	6.14603	15532	100	33.8	15532
3182	2015-08-03	09:51:31	6.15645	19642	100	33.9	19642
3183	2015-08-03	10:06:31	6.16686	36973	100	34.7	36973
3184	2015-08-03	10:21:31	6.17728	38195	100	36	38195
3185	2015-08-03	10:36:31	6.1877	19747	100	36.5	19747
3186	2015-08-03	10:51:31	6.19812	38146	100	35.9	38146
3187	2015-08-03	11:06:31	6.20853	22262	100	37.8	22262
3188	2015-08-03	11:21:31	6.21895	16651	100	36.4	16651
3189	2015-08-03	11:36:31	6.22937	22808	100	35.5	22808
3190	2015-08-03	11:51:31	6.23978	20555	100	37.7	20555
3191	2015-08-03	12:06:31	6.2502	19427	100	39.1	19427
3192	2015-08-03	12:21:31	6.26062	17654	100	37.4	17654
3193	2015-08-03	12:36:31	6.27103	39206	100	38.5	39206
3194	2015-08-03	12:51:31	6.28145	18485	100	37.7	18485
3195	2015-08-03	13:06:31	6.29187	20425	100	36.6	20425
3196	2015-08-03	13:21:31	6.30229	47881	21.7	38.9	47881
3197	2015-08-03	13:36:31	6.3127	16936	100	36.6	16936
3198	2015-08-03	13:51:31	6.32312	15888	100	35.5	15888
3199	2015-08-03	14:06:31	6.33354	16127	100	35.2	16127
3200	2015-08-03	14:21:31	6.34395	18864	100	35.2	18864
3201	2015-08-03	14:36:31	6.35437	15972	100	35.4	15972
3202	2015-08-03	14:51:31	6.36479	40701	100	35.3	40701
3203	2015-08-03	15:06:31	6.3752	16398	100	37.2	16398
3204	2015-08-03	15:21:31	6.38562	15271	100	37	15271
3205	2015-08-03	15:36:31	6.39604	14106	100	37.3	14106
3206	2015-08-03	15:51:31	6.40646	15168	100	37.3	15168
3207	2015-08-03	16:06:31	6.41687	14028	100	37.2	14028
3208	2015-08-03	16:21:31	6.42729	12269	100	36.7	12269
3209	2015-08-03	16:36:31	6.43771	30906	100	36.5	30906
3210	2015-08-03	16:51:31	6.44812	13927	100	36.3	13927
3211	2015-08-03	17:06:31	6.45854	11420	100	35.8	11420
3212	2015-08-03	17:21:31	6.46896	11892	100	34.8	11892
3213	2015-08-03	17:36:31	6.47937	12705	100	34.5	12705
3214	2015-08-03	17:51:31	6.48979	10878	100	33.5	10878
3215	2015-08-03	18:06:31	6.50021	10958	100	33	10958
3216	2015-08-03	18:21:31	6.51063	10705	100	32.4	10705
3217	2015-08-03	18:36:31	6.52104	10541	100	32.3	10541
3218	2015-08-03	18:51:31	6.53146	10275	100	32.2	10275
3219	2015-08-03	19:06:31	6.54188	10094	100	32	10094
3220	2015-08-03	19:21:31	6.55229	9989	99.9	31.8	9989
3221	2015-08-03	19:36:31	6.56271	9729	100	31.5	9729
3222	2015-08-03	19:51:31	6.57313	9526	100	31.7	9526
3223	2015-08-03	20:06:31	6.58354	484	0	31.2	484
3224	2015-08-03	20:21:31	6.59396	285	0	30.1	285
3225	2015-08-03	20:36:31	6.60438	123	0	29.4	123
3226	2015-08-03	20:51:31	6.6148	28	0	28.8	28
3227	2015-08-03	21:06:31	6.62521	2	0	28.3	2
3228	2015-08-03	21:21:31	6.63563	0	0	27.9	0
3229	2015-08-03	21:36:31	6.64605	0	0	27.5	0
3230	2015-08-03	21:51:31	6.65646	0	0	27.1	0
3231	2015-08-03	22:06:31	6.66688	0	0	26.8	0
3232	2015-08-03	22:21:31	6.6773	0	0	26.6	0
3233	2015-08-03	22:36:31	6.68771	0	0	26.4	0
3234	2015-08-03	22:51:31	6.69813	0	0	26.3	0
3235	2015-08-03	23:06:31	6.70855	0	0	26.1	0
3236	2015-08-03	23:21:31	6.71897	0	0	25.8	0
3237	2015-08-03	23:36:31	6.72938	0	0	25.6	0
3238	2015-08-03	23:51:31	6.7398	0	0	25.4	0
3239	2015-08-04	00:06:31	6.75022	0	0	25.3	0
3240	2015-08-04	00:21:31	6.76063	0	0	25.1	0
3241	2015-08-04	00:36:31	6.77105	0	0	25	0
3242	2015-08-04	00:51:31	6.78147	0	0	24.8	0
3243	2015-08-04	01:06:31	6.79188	0	0	24.6	0
3244	2015-08-04	01:21:31	6.8023	0	0	24.5	0
3245	2015-08-04	01:36:31	6.81272	0	0	24.5	0
3246	2015-08-04	01:51:31	6.82314	0	0	24.2	0
3247	2015-08-04	02:06:31	6.83355	0	0	24.1	0
3248	2015-08-04	02:21:31	6.84397	0	0	24.1	0
3249	2015-08-04	02:36:31	6.85439	0	0	23.9	0
3250	2015-08-04	02:51:31	6.8648	0	0	23.9	0
3251	2015-08-04	03:06:31	6.87522	0	0	23.8	0
3252	2015-08-04	03:21:31	6.88564	0	0	23.6	0
3253	2015-08-04	03:36:31	6.89605	0	0	23.5	0
3254	2015-08-04	03:51:31	6.90647	0	0	23.4	0
3255	2015-08-04	04:06:31	6.91689	0	0	23.3	0
3256	2015-08-04	04:21:31	6.92731	0	0	23.2	0
3257	2015-08-04	04:36:31	6.93772	0	0	23	0
3258	2015-08-04	04:51:31	6.94814	0	0	22.8	0
3259	2015-08-04	05:06:31	6.95856	0	0	22.7	0
3260	2015-08-04	05:21:31	6.96897	19	0	22.5	19
3261	2015-08-04	05:36:31	6.97939	92	0	22.4	92
3262	2015-08-04	05:51:31	6.98981	239	0	22.3	239
3263	2015-08-04	06:06:31	7.00022	6831	100	22.4	6831
3264	2015-08-04	06:21:31	7.01064	9819	100	24.9	9819
3265	2015-08-04	06:36:31	7.02106	10060	100	26.3	10060
3266	2015-08-04	06:51:31	7.03148	10365	100	25.1	10365
3267	2015-08-04	07:06:31	7.04189	10562	100	25.8	10562
3268	2015-08-04	07:21:31	7.05231	11002	100	26.5	11002
3269	2015-08-04	07:36:31	7.06273	11115	100	27.3	11115
3270	2015-08-04	07:51:31	7.07314	11156	99.9	28.6	11156
3271	2015-08-04	08:06:31	7.08356	11472	100	29.3	11472
3272	2015-08-04	08:21:31	7.09398	12330	100	30.4	12330
3273	2015-08-04	08:36:31	7.10439	13143	100	32.3	13143
3274	2015-08-04	08:51:31	7.11481	13385	100	34	13385
3275	2015-08-04	09:06:31	7.12523	13791	100	35.1	13791
3276	2015-08-04	09:21:31	7.13565	14425	100	35.5	14425
3277	2015-08-04	09:36:31	7.14606	14456	100	36.8	14456
3278	2015-08-04	09:51:31	7.15648	35317	100	36.7	35317
3279	2015-08-04	10:06:31	7.1669	37534	100	36.1	37534
3280	2015-08-04	10:21:31	7.17731	38640	100	37	38640
3281	2015-08-04	10:36:31	7.18773	15756	100	37.6	15756
3282	2015-08-04	10:51:31	7.19815	40336	100	37.7	40336
3283	2015-08-04	11:06:31	7.20856	16874	100	38.2	16874
3284	2015-08-04	11:21:31	7.21898	16399	100	38.8	16399
3285	2015-08-04	11:36:31	7.2294	16304	100	38.7	16304
3286	2015-08-04	11:51:31	7.23982	16449	100	39.4	16449
3287	2015-08-04	12:06:31	7.25023	17207	100	41.2	17207
3288	2015-08-04	12:21:31	7.26065	16810	100	41.1	16810
3289	2015-08-04	12:36:31	7.27107	22644	99.9	36.9	22644
3290	2015-08-04	12:51:31	7.28148	36197	100	34.9	36197
3291	2015-08-04	13:06:31	7.2919	14843	100	34	14843
3292	2015-08-04	13:21:31	7.30232	51508	0.9	34.2	51508
3293	2015-08-04	13:36:31	7.31273	41271	99.9	34.9	41271
3294	2015-08-04	13:51:31	7.32315	50726	0.9	35.7	50726
3295	2015-08-04	14:06:31	7.33357	19977	100	36.5	19977
3296	2015-08-04	14:21:31	7.34399	46956	0.9	35.3	46956
3297	2015-08-04	14:36:31	7.3544	16256	100	34.7	16256
3298	2015-08-04	14:51:31	7.36482	48011	0.9	32.5	48011
3299	2015-08-04	15:06:31	7.37524	16707	100	33.9	16707
3300	2015-08-04	15:21:31	7.38565	15262	100	32.8	15262
3301	2015-08-04	15:36:31	7.39607	14061	100	33.3	14061
3302	2015-08-04	15:51:31	7.40649	13436	100	33	13436
3303	2015-08-04	16:06:31	7.4169	10891	100	36.2	10891
3304	2015-08-04	16:21:31	7.42732	36068	100	36.9	36068
3305	2015-08-04	16:36:31	7.43774	27360	100	36.6	27360
3306	2015-08-04	16:51:31	7.44816	14406	100	37.4	14406
3307	2015-08-04	17:06:31	7.45857	10591	100.1	36.5	10591
3308	2015-08-04	17:21:31	7.46899	12524	100	35.7	12524
3309	2015-08-04	17:36:31	7.47941	10552	100	35.7	10552
3310	2015-08-04	17:51:31	7.48982	12289	100	34.9	12289
3311	2015-08-04	18:06:31	7.50024	10970	100	35.2	10970
3312	2015-08-04	18:21:31	7.51066	10582	100	34.4	10582
3313	2015-08-04	18:36:31	7.52107	10248	100	34.3	10248
3314	2015-08-04	18:51:31	7.53149	10127	100	34.5	10127
3315	2015-08-04	19:06:31	7.54191	9910	100	34.2	9910
3316	2015-08-04	19:21:31	7.55233	9824	100	33.9	9824
3317	2015-08-04	19:36:31	7.56274	9521	100	33.7	9521
3318	2015-08-04	19:51:31	7.57316	9633	100	33.4	9633
3319	2015-08-04	20:06:31	7.58358	487	0	32.7	487
3320	2015-08-04	20:21:31	7.59399	224	0	31.7	224
3321	2015-08-04	20:36:31	7.60441	79	0	30.9	79
3322	2015-08-04	20:51:31	7.61483	18	0	30.5	18
3323	2015-08-04	21:06:31	7.62524	1	0	30.1	1
3324	2015-08-04	21:21:31	7.63566	0	0	29.5	0
3325	2015-08-04	21:36:31	7.64608	0	0	29.2	0
3326	2015-08-04	21:51:31	7.6565	0	0	29	0
3327	2015-08-04	22:06:31	7.66691	0	0	28.8	0
3328	2015-08-04	22:21:31	7.67733	0	0	28.5	0
3329	2015-08-04	22:36:31	7.68775	0	0	28.3	0
3330	2015-08-04	22:51:31	7.69816	0	0	28	0
3331	2015-08-04	23:06:31	7.70858	0	0	27.8	0
3332	2015-08-04	23:21:31	7.719	0	0	27.5	0
3333	2015-08-04	23:36:31	7.72941	0	0	27.3	0
3334	2015-08-04	23:51:31	7.73983	0	0	27.1	0
3335	2015-08-05	00:06:31	7.75025	0	0	26.9	0
3336	2015-08-05	00:21:31	7.76067	0	0	26.7	0
3337	2015-08-05	00:36:31	7.77108	0	0	26.3	0
3338	2015-08-05	00:51:31	7.7815	0	0	26.1	0
3339	2015-08-05	01:06:31	7.79192	0	0	26.1	0
3340	2015-08-05	01:21:31	7.80233	0	0	25.9	0
3341	2015-08-05	01:36:31	7.81275	0	0	25.9	0
3342	2015-08-05	01:51:31	7.82317	0	0	25.9	0
3343	2015-08-05	02:06:31	7.83358	0	0	25.9	0
3344	2015-08-05	02:21:31	7.844	0	0	25.7	0
3345	2015-08-05	02:36:31	7.85442	0	0	25.5	0
3346	2015-08-05	02:51:31	7.86484	0	0	25.4	0
3347	2015-08-05	03:06:31	7.87525	0	0	25.3	0
3348	2015-08-05	03:21:31	7.88567	0	0	25	0
3349	2015-08-05	03:36:31	7.89609	0	0	25	0
3350	2015-08-05	03:51:31	7.9065	0	0	24.9	0
3351	2015-08-05	04:06:31	7.91692	0	0	24.7	0
3352	2015-08-05	04:21:31	7.92734	0	0	24.5	0
3353	2015-08-05	04:36:31	7.93775	0	0	24.3	0
3354	2015-08-05	04:51:31	7.94817	0	0	24	0
3355	2015-08-05	05:06:31	7.95859	0	0	23.8	0
3356	2015-08-05	05:21:31	7.96901	12	0	23.5	12
3357	2015-08-05	05:36:31	7.97942	65	0	23.4	65
3358	2015-08-05	05:51:31	7.98984	175	0	23.3	175
3359	2015-08-05	06:06:31	8.00026	6757	100	23.5	6757
3360	2015-08-05	06:21:31	8.01067	9828	100	25.2	9828
3361	2015-08-05	06:36:31	8.02109	10025	100	26.6	10025
3362	2015-08-05	06:51:31	8.03151	10322	100	27.9	10322
3363	2015-08-05	07:06:31	8.04192	10362	100	27.8	10362
3364	2015-08-05	07:21:31	8.05234	10910	100	27.2	10910
3365	2015-08-05	07:36:31	8.06276	11119	100	26.9	11119
3366	2015-08-05	07:51:31	8.07318	11283	100	28.6	11283
3367	2015-08-05	08:06:31	8.08359	11852	100	29	11852
3368	2015-08-05	08:21:31	8.09401	14769	100	30.4	14769
3369	2015-08-05	08:36:31	8.10443	13821	100	31.2	13821
3370	2015-08-05	08:51:31	8.11484	14046	100	32.3	14046
3371	2015-08-05	09:06:31	8.12526	15216	100	33.2	15216
3372	2015-08-05	09:21:31	8.13568	16172	100	35	16172
3373	2015-08-05	09:36:31	8.14609	14158	100	35.3	14158
3374	2015-08-05	09:51:31	8.15651	34759	100	35.3	34759
3375	2015-08-05	10:06:31	8.16693	37848	100	35.3	37848
3376	2015-08-05	10:21:31	8.17735	36690	100	35.8	36690
3377	2015-08-05	10:36:31	8.18776	18226	100	36.5	18226
3378	2015-08-05	10:51:31	8.19818	26130	100	36.1	26130
3379	2015-08-05	11:06:31	8.2086	37107	100	36.4	37107
3380	2015-08-05	11:21:31	8.21901	17501	100	36.4	17501
3381	2015-08-05	11:36:31	8.22943	21466	100	38.2	21466
3382	2015-08-05	11:51:31	8.23985	19716	100	35.6	19716
3383	2015-08-05	12:06:31	8.25026	19867	100	35.2	19867
3384	2015-08-05	12:21:31	8.26068	19313	100	38.1	19313
3385	2015-08-05	12:36:31	8.2711	21926	100	38.7	21926
3386	2015-08-05	12:51:31	8.28152	14468	100	35.4	14468
3387	2015-08-05	13:06:31	8.29193	28391	99.9	37.1	28391
3388	2015-08-05	13:21:31	8.30235	13685	100	36.9	13685
3389	2015-08-05	13:36:31	8.31277	15034	100	35.4	15034
3390	2015-08-05	13:51:31	8.32318	50389	0.9	37.7	50389
3391	2015-08-05	14:06:31	8.3336	17392	100	34.7	17392
3392	2015-08-05	14:21:31	8.34402	21279	100.1	32.7	21279
3393	2015-08-05	14:36:31	8.35443	48862	0.9	32.4	48862
3394	2015-08-05	14:51:31	8.36485	47472	0.9	31.2	47472
3395	2015-08-05	15:06:31	8.37527	18919	100.1	31	18919
3396	2015-08-05	15:21:31	8.38569	13930	100	31.3	13930
3397	2015-08-05	15:36:31	8.3961	15071	100	29.5	15071
3398	2015-08-05	15:51:31	8.40652	14129	100	35	14129
3399	2015-08-05	16:06:31	8.41694	14584	100	35.7	14584
3400	2015-08-05	16:21:31	8.42735	28689	100	34.4	28689
3401	2015-08-05	16:36:31	8.43777	22328	100	35.4	22328
3402	2015-08-05	16:51:31	8.44819	14088	100	35.6	14088
3403	2015-08-05	17:06:31	8.4586	29275	100.1	36.5	29275
3404	2015-08-05	17:21:31	8.46902	12442	100.1	36	12442
3405	2015-08-05	17:36:31	8.47944	14389	100	36.8	14389
3406	2015-08-05	17:51:31	8.48986	12825	100	36	12825
3407	2015-08-05	18:06:31	8.50027	11428	100	35.1	11428
3408	2015-08-05	18:21:31	8.51069	10640	100	34.4	10640
3409	2015-08-05	18:36:31	8.52111	10402	100	34	10402
3410	2015-08-05	18:51:31	8.53152	10098	100	33.6	10098
3411	2015-08-05	19:06:31	8.54194	9990	100	33	9990
3412	2015-08-05	19:21:31	8.55236	9638	100	32.7	9638
3413	2015-08-05	19:36:31	8.56277	9692	100	32.4	9692
3414	2015-08-05	19:51:31	8.57319	9447	100	32	9447
3415	2015-08-05	20:06:31	8.58361	429	0	31.1	429
3416	2015-08-05	20:21:31	8.59403	216	0	30.5	216
3417	2015-08-05	20:36:31	8.60444	70	0	29.8	70
3418	2015-08-05	20:51:31	8.61486	13	0	29.2	13
3419	2015-08-05	21:06:31	8.62528	0	0	28.7	0
3420	2015-08-05	21:21:31	8.63569	0	0	28.4	0
3421	2015-08-05	21:36:31	8.64611	0	0	27.9	0
3422	2015-08-05	21:51:31	8.65653	0	0	27.6	0
3423	2015-08-05	22:06:31	8.66694	0	0	27.3	0
3424	2015-08-05	22:21:31	8.67736	0	0	27.1	0
3425	2015-08-05	22:36:31	8.68778	0	0	26.9	0
3426	2015-08-05	22:51:31	8.6982	0	0	26.6	0
3427	2015-08-05	23:06:31	8.70861	0	0	26.3	0
3428	2015-08-05	23:21:31	8.71903	0	0	26.2	0
3429	2015-08-05	23:36:31	8.72945	0	0	26.1	0
3430	2015-08-05	23:51:31	8.73986	0	0	25.9	0
3431	2015-08-06	00:06:31	8.75028	0	0	25.8	0
3432	2015-08-06	00:21:31	8.7607	0	0	25.8	0
3433	2015-08-06	00:36:31	8.77111	0	0	25.7	0
3434	2015-08-06	00:51:31	8.78153	0	0	25.5	0
3435	2015-08-06	01:06:31	8.79195	0	0	25.4	0
3436	2015-08-06	01:21:31	8.80237	0	0	25.2	0
3437	2015-08-06	01:36:31	8.81278	0	0	25.1	0
3438	2015-08-06	01:51:31	8.8232	0	0	24.9	0
3439	2015-08-06	02:06:31	8.83362	0	0	24.8	0
3440	2015-08-06	02:21:31	8.84403	0	0	24.6	0
3441	2015-08-06	02:36:31	8.85445	0	0	24.5	0
3442	2015-08-06	02:51:31	8.86487	0	0	24.4	0
3443	2015-08-06	03:06:31	8.87528	0	0	24.2	0
3444	2015-08-06	03:21:31	8.8857	0	0	24.2	0
3445	2015-08-06	03:36:31	8.89612	0	0	24.1	0
3446	2015-08-06	03:51:31	8.90654	0	0	24	0
3447	2015-08-06	04:06:31	8.91695	0	0	24	0
3448	2015-08-06	04:21:31	8.92737	0	0	24	0
3449	2015-08-06	04:36:31	8.93779	0	0	23.8	0
3450	2015-08-06	04:51:31	8.9482	0	0	23.7	0
3451	2015-08-06	05:06:31	8.95862	0	0	23.5	0
3452	2015-08-06	05:21:31	8.96904	9	0	23.4	9
3453	2015-08-06	05:36:31	8.97945	60	0	23.3	60
3454	2015-08-06	05:51:31	8.98987	179	0	23.3	179
3455	2015-08-06	06:06:31	9.00029	6800	100	23.5	6800
3456	2015-08-06	06:21:31	9.01071	9847	100	26	9847
3457	2015-08-06	06:36:31	9.02112	9750	100	26.6	9750
3458	2015-08-06	06:51:31	9.03154	9947	100	25.8	9947
3459	2015-08-06	07:06:31	9.04196	10461	100	26.2	10461
3460	2015-08-06	07:21:31	9.05237	10600	100.1	27.2	10600
3461	2015-08-06	07:36:31	9.06279	10719	100	27.4	10719
3462	2015-08-06	07:51:31	9.07321	10928	100	28.5	10928
3463	2015-08-06	08:06:31	9.08362	11323	100	28.9	11323
3464	2015-08-06	08:21:31	9.09404	12294	100	30.1	12294
3465	2015-08-06	08:36:31	9.10446	13341	100	31.9	13341
3466	2015-08-06	08:51:31	9.11488	13407	100	33.6	13407
3467	2015-08-06	09:06:31	9.12529	13854	100	35	13854
3468	2015-08-06	09:21:31	9.13571	14084	100	34.8	14084
3469	2015-08-06	09:36:31	9.14613	13778	100	34.2	13778
3470	2015-08-06	09:51:31	9.15654	15105	100	35.1	15105
3471	2015-08-06	10:06:31	9.16696	29128	100	35.9	29128
3472	2015-08-06	10:21:31	9.17738	33795	100	37.2	33795
3473	2015-08-06	10:36:31	9.18779	15674	100	37.7	15674
3474	2015-08-06	10:51:31	9.19821	41162	100	38.3	41162
3475	2015-08-06	11:06:31	9.20863	36821	100.1	39.4	36821
3476	2015-08-06	11:21:31	9.21905	25256	100	39.3	25256
3477	2015-08-06	11:36:31	9.22946	17475	100	39.8	17475
3478	2015-08-06	11:51:31	9.23988	16510	100.1	34.4	16510
3479	2015-08-06	12:06:31	9.2503	17321	100	35	17321
3480	2015-08-06	12:21:31	9.26071	16907	100	34.8	16907
3481	2015-08-06	12:36:31	9.27113	16699	99.9	34.8	16699
3482	2015-08-06	12:51:31	9.28155	16961	100	35.7	16961
3483	2015-08-06	13:06:31	9.29196	34346	100.1	34.8	34346
3484	2015-08-06	13:21:31	9.30238	18061	100	35.6	18061
3485	2015-08-06	13:36:31	9.3128	18124	100	36.5	18124
3486	2015-08-06	13:51:31	9.32322	30077	100	36.1	30077
3487	2015-08-06	14:06:31	9.33363	19974	100	35.4	19974
3488	2015-08-06	14:21:31	9.34405	25270	100	33.8	25270
3489	2015-08-06	14:36:31	9.35447	40697	100	33.7	40697
3490	2015-08-06	14:51:31	9.36488	39253	100	33.6	39253
3491	2015-08-06	15:06:31	9.3753	13266	100	32.8	13266
3492	2015-08-06	15:21:31	9.38572	14581	99.9	33.3	14581
3493	2015-08-06	15:36:31	9.39613	13410	100	38.4	13410
3494	2015-08-06	15:51:31	9.40655	13121	100	38.5	13121
3495	2015-08-06	16:06:31	9.41697	12909	100	39.5	12909
3496	2015-08-06	16:21:31	9.42739	33895	99.9	39.6	33895
3497	2015-08-06	16:36:31	9.4378	28669	100	39.1	28669
3498	2015-08-06	16:51:31	9.44822	12625	100	38.4	12625
3499	2015-08-06	17:06:31	9.45864	27609	100	38	27609
3500	2015-08-06	17:21:31	9.46905	11968	99.9	38.2	11968
3501	2015-08-06	17:36:31	9.47947	12245	100	38.2	12245
3502	2015-08-06	17:51:31	9.48989	11100	100	37.2	11100
3503	2015-08-06	18:06:31	9.5003	10333	100	36.4	10333
3504	2015-08-06	18:21:31	9.51072	10268	100	35.7	10268
3505	2015-08-06	18:36:31	9.52114	10444	100	34.7	10444
3506	2015-08-06	18:51:31	9.53156	10196	99.9	34.8	10196
3507	2015-08-06	19:06:31	9.54197	9724	100.1	33.8	9724
3508	2015-08-06	19:21:31	9.55239	9693	100	33.6	9693
3509	2015-08-06	19:36:31	9.56281	9756	100	33.6	9756
3510	2015-08-06	19:51:31	9.57322	9464	100	32.6	9464
3511	2015-08-06	20:06:31	9.58364	374	0	32.2	374
3512	2015-08-06	20:21:31	9.59406	153	0	30.8	153
3513	2015-08-06	20:36:31	9.60447	66	0	29.9	66
3514	2015-08-06	20:51:31	9.61489	11	0	29.6	11
3515	2015-08-06	21:06:31	9.62531	0	0	28.6	0
3516	2015-08-06	21:21:31	9.63573	0	0	28.4	0
3517	2015-08-06	21:36:31	9.64614	0	0	28.2	0
3518	2015-08-06	21:51:31	9.65656	0	0	27.2	0
3519	2015-08-06	22:06:31	9.66698	0	0	27.3	0
3520	2015-08-06	22:21:31	9.67739	0	0	26.4	0
3521	2015-08-06	22:36:31	9.68781	0	0	26.3	0
3522	2015-08-06	22:51:31	9.69823	0	0	26.3	0
3523	2015-08-06	23:06:31	9.70864	0	0	25.5	0
3524	2015-08-06	23:21:31	9.71906	0	0	26.7	0
3525	2015-08-06	23:36:31	9.72948	0	0	26.8	0
3526	2015-08-06	23:51:31	9.7399	0	0	26.8	0
3527	2015-08-07	00:06:31	9.75031	0	0	26.7	0
3528	2015-08-07	00:21:31	9.76073	0	0	26.6	0
3529	2015-08-07	00:36:31	9.77115	0	0	26.5	0
3530	2015-08-07	00:51:31	9.78156	0	0	26.4	0
3531	2015-08-07	01:06:31	9.79198	0	0	26.2	0
3532	2015-08-07	01:21:31	9.8024	0	0	26.1	0
3533	2015-08-07	01:36:31	9.81281	0	0	26	0
3534	2015-08-07	01:51:31	9.82323	0	0	25.8	0
3535	2015-08-07	02:06:31	9.83365	0	0	25.7	0
3536	2015-08-07	02:21:31	9.84407	0	0	25.8	0
3537	2015-08-07	02:36:31	9.85448	0	0	25.7	0
3538	2015-08-07	02:51:31	9.8649	0	0	25.6	0
3539	2015-08-07	03:06:31	9.87532	0	0	25.4	0
3540	2015-08-07	03:21:31	9.88573	0	0	25.2	0
3541	2015-08-07	03:36:31	9.89615	0	0	25.1	0
3542	2015-08-07	03:51:31	9.90657	0	0	25	0
3543	2015-08-07	04:06:31	9.91698	0	0	24.8	0
3544	2015-08-07	04:21:31	9.9274	0	0	24.7	0
3545	2015-08-07	04:36:31	9.93782	0	0	24.5	0
3546	2015-08-07	04:51:31	9.94824	0	0	24.4	0
3547	2015-08-07	05:06:31	9.95865	0	0	24.2	0
3548	2015-08-07	05:21:31	9.96907	8	0	24.1	8
3549	2015-08-07	05:36:31	9.97949	60	0	24.1	60
3550	2015-08-07	05:51:31	9.9899	186	0	24.1	186
3551	2015-08-07	06:06:31	10.0003	6647	100	24.2	6647
3552	2015-08-07	06:21:31	10.0107	9663	100	26.7	9663
3553	2015-08-07	06:36:31	10.0212	9874	100	26.5	9874
3554	2015-08-07	06:51:31	10.0316	10232	100	26.7	10232
3555	2015-08-07	07:06:31	10.042	10496	100	27.7	10496
3556	2015-08-07	07:21:31	10.0524	10383	100	28.8	10383
3557	2015-08-07	07:36:31	10.0628	10479	100	28.8	10479
3558	2015-08-07	07:51:31	10.0732	11083	99.9	29.3	11083
3559	2015-08-07	08:06:31	10.0837	11395	100	30	11395
3560	2015-08-07	08:21:31	10.0941	12455	100	31.3	12455
3561	2015-08-07	08:36:31	10.1045	13059	100	33.5	13059
3562	2015-08-07	08:51:31	10.1149	13594	100	35.2	13594
3563	2015-08-07	09:06:31	10.1253	13235	100	35.5	13235
3564	2015-08-07	09:21:31	10.1357	13812	100	36.1	13812
3565	2015-08-07	09:36:31	10.1462	14313	100	36.5	14313
3566	2015-08-07	09:51:31	10.1566	15074	100	37.5	15074
3567	2015-08-07	10:06:31	10.167	28860	100	37.7	28860
3568	2015-08-07	10:21:31	10.1774	27749	100	37.9	27749
3569	2015-08-07	10:36:31	10.1878	15261	100	38.9	15261
3570	2015-08-07	10:51:31	10.1982	37136	99.9	39.1	37136
3571	2015-08-07	11:06:31	10.2087	37398	99.9	40.4	37398
3572	2015-08-07	11:21:31	10.2191	35287	100	41.6	35287
3573	2015-08-07	11:36:31	10.2295	16355	99.9	41.3	16355
3574	2015-08-07	11:51:31	10.2399	16676	99.9	43	16676
3575	2015-08-07	12:06:31	10.2503	17874	99.9	44.1	17874
3576	2015-08-07	12:21:31	10.2607	18440	100	44.5	18440
3577	2015-08-07	12:36:31	10.2712	17606	100	39.3	17606
3578	2015-08-07	12:51:31	10.2816	14219	100	35.9	14219
3579	2015-08-07	13:06:31	10.292	33699	100	35.7	33699
3580	2015-08-07	13:21:31	10.3024	19442	100	37.1	19442
3581	2015-08-07	13:36:31	10.3128	20177	100	37.3	20177
3582	2015-08-07	13:51:31	10.3232	34635	100	38.5	34635
3583	2015-08-07	14:06:31	10.3337	18000	100	38.8	18000
3584	2015-08-07	14:21:31	10.3441	38930	99.9	36.7	38930
3585	2015-08-07	14:36:31	10.3545	42739	100	37.9	42739
3586	2015-08-07	14:51:31	10.3649	42782	100	37.9	42782
3587	2015-08-07	15:06:31	10.3753	18932	100	38.3	18932
3588	2015-08-07	15:21:31	10.3857	16357	100	38	16357
3589	2015-08-07	15:36:31	10.3962	15256	100	37.7	15256
3590	2015-08-07	15:51:31	10.4066	14154	100	37.3	14154
3591	2015-08-07	16:06:31	10.417	14267	100	36.8	14267
3592	2015-08-07	16:21:31	10.4274	30423	100	36.5	30423
3593	2015-08-07	16:36:31	10.4378	28855	99.9	36.1	28855
3594	2015-08-07	16:51:31	10.4483	13544	100	35.8	13544
3595	2015-08-07	17:06:31	10.4587	25879	100	35.2	25879
3596	2015-08-07	17:21:31	10.4691	12279	100	37.2	12279
3597	2015-08-07	17:36:31	10.4795	12730	100	38.2	12730
3598	2015-08-07	17:51:31	10.4899	11801	100	38.5	11801
3599	2015-08-07	18:06:31	10.5003	11127	100	37.6	11127
3600	2015-08-07	18:21:31	10.5108	10483	100	37.4	10483
3601	2015-08-07	18:36:31	10.5212	10415	100	36.3	10415
3602	2015-08-07	18:51:31	10.5316	10056	100	37.2	10056
3603	2015-08-07	19:06:31	10.542	9725	100	37	9725
3604	2015-08-07	19:21:31	10.5524	9522	100	36.9	9522
3605	2015-08-07	19:36:31	10.5628	9279	100	36.5	9279
3606	2015-08-07	19:51:31	10.5733	9127	100	36.1	9127
3607	2015-08-07	20:06:31	10.5837	362	0	35.2	362
3608	2015-08-07	20:21:31	10.5941	180	0	34	180
3609	2015-08-07	20:36:31	10.6045	60	0	33.1	60
3610	2015-08-07	20:51:31	10.6149	9	0	32.4	9
3611	2015-08-07	21:06:31	10.6253	0	0	31.8	0
3612	2015-08-07	21:21:31	10.6358	0	0	31.3	0
3613	2015-08-07	21:36:31	10.6462	0	0	30.9	0
3614	2015-08-07	21:51:31	10.6566	0	0	30.6	0
3615	2015-08-07	22:06:31	10.667	0	0	30.5	0
3616	2015-08-07	22:21:31	10.6774	0	0	30.2	0
3617	2015-08-07	22:36:31	10.6878	0	0	29.9	0
3618	2015-08-07	22:51:31	10.6983	0	0	29.7	0
3619	2015-08-07	23:06:31	10.7087	0	0	29.5	0
3620	2015-08-07	23:21:31	10.7191	0	0	29.4	0
3621	2015-08-07	23:36:31	10.7295	0	0	29.2	0
3622	2015-08-07	23:51:31	10.7399	0	0	29.2	0
3623	2015-08-08	00:06:31	10.7503	0	0	28.9	0
3624	2015-08-08	00:21:31	10.7608	0	0	28.8	0
3625	2015-08-08	00:36:31	10.7712	0	0	28.7	0
3626	2015-08-08	00:51:31	10.7816	0	0	28.4	0
3627	2015-08-08	01:06:31	10.792	0	0	28.2	0
3628	2015-08-08	01:21:31	10.8024	0	0	28	0
3629	2015-08-08	01:36:31	10.8128	0	0	27.8	0
3630	2015-08-08	01:51:31	10.8233	0	0	27.7	0
3631	2015-08-08	02:06:31	10.8337	0	0	27.5	0
3632	2015-08-08	02:21:31	10.8441	0	0	27.3	0
3633	2015-08-08	02:36:31	10.8545	0	0	27.1	0
3634	2015-08-08	02:51:31	10.8649	0	0	27	0
3635	2015-08-08	03:06:31	10.8753	0	0	26.8	0
3636	2015-08-08	03:21:31	10.8858	0	0	26.7	0
3637	2015-08-08	03:36:31	10.8962	0	0	26.6	0
3638	2015-08-08	03:51:31	10.9066	0	0	26.4	0
3639	2015-08-08	04:06:31	10.917	0	0	26.2	0
3640	2015-08-08	04:21:31	10.9274	0	0	26.2	0
3641	2015-08-08	04:36:31	10.9379	0	0	26.1	0
3642	2015-08-08	04:51:31	10.9483	0	0	26	0
3643	2015-08-08	05:06:31	10.9587	0	0	25.8	0
3644	2015-08-08	05:21:31	10.9691	7	0	25.6	7
3645	2015-08-08	05:36:31	10.9795	51	0	25.5	51
3646	2015-08-08	05:51:31	10.9899	158	0	25.5	158
3647	2015-08-08	06:06:31	11.0004	6443	100	25.6	6443
3648	2015-08-08	06:21:31	11.0108	9469	100	28.3	9469
3649	2015-08-08	06:36:31	11.0212	9624	100	30	9624
3650	2015-08-08	06:51:31	11.0316	9836	100	30.9	9836
3651	2015-08-08	07:06:31	11.042	9894	100	28.8	9894
3652	2015-08-08	07:21:31	11.0524	10014	100	29.3	10014
3653	2015-08-08	07:36:31	11.0629	10131	100	30	10131
3654	2015-08-08	07:51:31	11.0733	10352	100	30.5	10352
3655	2015-08-08	08:06:31	11.0837	10654	100	31.2	10654
3656	2015-08-08	08:21:31	11.0941	11526	100	32.5	11526
3657	2015-08-08	08:36:31	11.1045	12123	100	34.5	12123
3658	2015-08-08	08:51:31	11.1149	12363	100	35.6	12363
3659	2015-08-08	09:06:31	11.1254	12678	100	36.6	12678
3660	2015-08-08	09:21:31	11.1358	13304	100	37.9	13304
3661	2015-08-08	09:36:31	11.1462	13252	100	37.9	13252
3662	2015-08-08	09:51:31	11.1566	13973	100	39.1	13973
3663	2015-08-08	10:06:31	11.167	29310	100	39.1	29310
3664	2015-08-08	10:21:31	11.1774	20953	100	40.6	20953
3665	2015-08-08	10:36:31	11.1879	14697	100	41.9	14697
3666	2015-08-08	10:51:31	11.1983	39286	100	42.2	39286
3667	2015-08-08	11:06:31	11.2087	40581	100	43.7	40581
3668	2015-08-08	11:21:31	11.2191	39333	100	43.4	39333
3669	2015-08-08	11:36:31	11.2295	15857	100	44.1	15857
3670	2015-08-08	11:51:31	11.2399	15462	100	43.7	15462
3671	2015-08-08	12:06:31	11.2504	15792	100	43.7	15792
3672	2015-08-08	12:21:31	11.2608	15825	100	44	15825
3673	2015-08-08	12:36:31	11.2712	16094	100	44.7	16094
3674	2015-08-08	12:51:31	11.2816	16188	100	44.8	16188
3675	2015-08-08	13:06:31	11.292	28711	100	44	28711
3676	2015-08-08	13:21:31	11.3024	22277	100	43.6	22277
3677	2015-08-08	13:36:31	11.3129	16613	100	44.8	16613
3678	2015-08-08	13:51:31	11.3233	42312	100	45.6	42312
3679	2015-08-08	14:06:31	11.3337	16073	100	45.5	16073
3680	2015-08-08	14:21:31	11.3441	43224	100	44.9	43224
3681	2015-08-08	14:36:31	11.3545	44169	100	44.1	44169
3682	2015-08-08	14:51:31	11.3649	41279	100	44.3	41279
3683	2015-08-08	15:06:31	11.3754	15893	100	44.5	15893
3684	2015-08-08	15:21:31	11.3858	13996	100	43.8	13996
3685	2015-08-08	15:36:31	11.3962	13729	100	44.5	13729
3686	2015-08-08	15:51:31	11.4066	13316	100	43.5	13316
3687	2015-08-08	16:06:31	11.417	12706	100	43	12706
3688	2015-08-08	16:21:31	11.4274	31172	100	43.3	31172
3689	2015-08-08	16:36:31	11.4379	26856	100	42.4	26856
3690	2015-08-08	16:51:31	11.4483	10921	100	41.9	10921
3691	2015-08-08	17:06:31	11.4587	10847	100	40.6	10847
3692	2015-08-08	17:21:31	11.4691	12020	100	40	12020
3693	2015-08-08	17:36:31	11.4795	12045	100	40.3	12045
3694	2015-08-08	17:51:31	11.49	10827	100	39.3	10827
3695	2015-08-08	18:06:31	11.5004	10257	100	39.2	10257
3696	2015-08-08	18:21:31	11.5108	10045	100	38.9	10045
3697	2015-08-08	18:36:31	11.5212	9686	100	37.6	9686
3698	2015-08-08	18:51:31	11.5316	9159	100	37.3	9159
3699	2015-08-08	19:06:31	11.542	9008	100	36.2	9008
3700	2015-08-08	19:21:31	11.5525	8736	100	34.8	8736
3701	2015-08-08	19:36:31	11.5629	8468	100	35.1	8468
3702	2015-08-08	19:51:31	11.5733	8490	100	34.9	8490
3703	2015-08-08	20:06:31	11.5837	182	0	34.2	182
3704	2015-08-08	20:21:31	11.5941	120	0	33.2	120
3705	2015-08-08	20:36:31	11.6045	39	0	32.5	39
3706	2015-08-08	20:51:31	11.615	5	0	32.1	5
3707	2015-08-08	21:06:31	11.6254	0	0	31.6	0
3708	2015-08-08	21:21:31	11.6358	0	0	31.4	0
3709	2015-08-08	21:36:31	11.6462	0	0	31.2	0
3710	2015-08-08	21:51:31	11.6566	0	0	31.2	0
3711	2015-08-08	22:06:31	11.667	0	0	30.9	0
3712	2015-08-08	22:21:31	11.6775	0	0	30.7	0
3713	2015-08-08	22:36:31	11.6879	0	0	30.7	0
3714	2015-08-08	22:51:31	11.6983	0	0	30.3	0
3715	2015-08-08	23:06:31	11.7087	0	0	30.1	0
3716	2015-08-08	23:21:31	11.7191	0	0	29.7	0
3717	2015-08-08	23:36:31	11.7295	0	0	29.4	0
3718	2015-08-08	23:51:31	11.74	0	0	29.1	0
3719	2015-08-09	00:06:31	11.7504	0	0	28.7	0
3720	2015-08-09	00:21:31	11.7608	0	0	28.5	0
3721	2015-08-09	00:36:31	11.7712	0	0	28.3	0
3722	2015-08-09	00:51:31	11.7816	0	0	28	0
3723	2015-08-09	01:06:31	11.792	0	0	27.8	0
3724	2015-08-09	01:21:31	11.8025	0	0	27.7	0
3725	2015-08-09	01:36:31	11.8129	0	0	27.4	0
3726	2015-08-09	01:51:31	11.8233	0	0	27.3	0
3727	2015-08-09	02:06:31	11.8337	0	0	27	0
3728	2015-08-09	02:21:31	11.8441	0	0	27	0
3729	2015-08-09	02:36:31	11.8545	0	0	26.8	0
3730	2015-08-09	02:51:31	11.865	0	0	26.7	0
3731	2015-08-09	03:06:31	11.8754	0	0	26.7	0
3732	2015-08-09	03:21:31	11.8858	0	0	26.6	0
3733	2015-08-09	03:36:31	11.8962	0	0	26.5	0
3734	2015-08-09	03:51:31	11.9066	0	0	26.4	0
3735	2015-08-09	04:06:31	11.917	0	0	26.3	0
3736	2015-08-09	04:21:31	11.9275	0	0	26.1	0
3737	2015-08-09	04:36:31	11.9379	0	0	25.8	0
3738	2015-08-09	04:51:31	11.9483	0	0	25.7	0
3739	2015-08-09	05:06:31	11.9587	0	0	25.6	0
3740	2015-08-09	05:21:31	11.9691	4	0	25.4	4
3741	2015-08-09	05:36:31	11.9796	38	0	25.2	38
3742	2015-08-09	05:51:31	11.99	139	0	25.2	139
3743	2015-08-09	06:06:31	12.0004	6430	100	25.3	6430
3744	2015-08-09	06:21:31	12.0108	9409	100	27.8	9409
3745	2015-08-09	06:36:31	12.0212	9628	100	29	9628
3746	2015-08-09	06:51:31	12.0316	9970	100	29.7	9970
3747	2015-08-09	07:06:31	12.0421	10230	100	30.4	10230
3748	2015-08-09	07:21:31	12.0525	10278	100	28.9	10278
3749	2015-08-09	07:36:31	12.0629	10635	100	29.4	10635
3750	2015-08-09	07:51:31	12.0733	11544	100	29.7	11544
3751	2015-08-09	08:06:31	12.0837	11459	100.1	30.5	11459
3752	2015-08-09	08:21:31	12.0941	12046	100	31.4	12046
3753	2015-08-09	08:36:31	12.1046	12914	100	32.6	12914
3754	2015-08-09	08:51:31	12.115	12038	100	32.8	12038
3755	2015-08-09	09:06:31	12.1254	13478	100	34.1	13478
3756	2015-08-09	09:21:31	12.1358	14361	100	35.2	14361
3757	2015-08-09	09:36:31	12.1462	14695	100	35.1	14695
3758	2015-08-09	09:51:31	12.1566	15668	100	35.7	15668
3759	2015-08-09	10:06:31	12.1671	22830	100	36	22830
3760	2015-08-09	10:21:31	12.1775	17558	100	36.5	17558
3761	2015-08-09	10:36:31	12.1879	17795	100	36	17795
3762	2015-08-09	10:51:31	12.1983	28324	100.1	35.5	28324
3763	2015-08-09	11:06:31	12.2087	20328	100.1	34.7	20328
3764	2015-08-09	11:21:31	12.2191	18070	100	34.3	18070
3765	2015-08-09	11:36:31	12.2296	19745	100	34.3	19745
3766	2015-08-09	11:51:31	12.24	17563	100	34.9	17563
3767	2015-08-09	12:06:31	12.2504	18845	100.1	36.2	18845
3768	2015-08-09	12:21:31	12.2608	19088	100	37.2	19088
3769	2015-08-09	12:36:31	12.2712	19016	100	38.1	19016
3770	2015-08-09	12:51:31	12.2816	19116	100	39.4	19116
3771	2015-08-09	13:06:31	12.2921	22756	100	38.8	22756
3772	2015-08-09	13:21:31	12.3025	29815	100	38.6	29815
3773	2015-08-09	13:36:31	12.3129	18762	100	38.3	18762
3774	2015-08-09	13:51:31	12.3233	35635	99.9	40.4	35635
3775	2015-08-09	14:06:31	12.3337	17966	99.9	41.1	17966
3776	2015-08-09	14:21:31	12.3441	38093	100	39.1	38093
3777	2015-08-09	14:36:31	12.3546	38383	100	39.2	38383
3778	2015-08-09	14:51:31	12.365	36483	99.9	39	36483
3779	2015-08-09	15:06:31	12.3754	16773	100	39.6	16773
3780	2015-08-09	15:21:31	12.3858	15189	100	39.2	15189
3781	2015-08-09	15:36:31	12.3962	14603	100	38.8	14603
3782	2015-08-09	15:51:31	12.4066	14029	100	39.2	14029
3783	2015-08-09	16:06:31	12.4171	13819	100	39.6	13819
3784	2015-08-09	16:21:31	12.4275	26963	100	38.4	26963
3785	2015-08-09	16:36:31	12.4379	18018	100	38.6	18018
3786	2015-08-09	16:51:31	12.4483	13270	100	37.8	13270
3787	2015-08-09	17:06:31	12.4587	15231	100	37.8	15231
3788	2015-08-09	17:21:31	12.4691	12068	100	37.8	12068
3789	2015-08-09	17:36:31	12.4796	11495	100	36.3	11495
3790	2015-08-09	17:51:31	12.49	11171	100	36.4	11171
3791	2015-08-09	18:06:31	12.5004	10698	100	35.4	10698
3792	2015-08-09	18:21:31	12.5108	10351	100	34.9	10351
3793	2015-08-09	18:36:31	12.5212	10260	100	34.7	10260
3794	2015-08-09	18:51:31	12.5317	9888	100	35.2	9888
3795	2015-08-09	19:06:31	12.5421	9511	100	34.7	9511
3796	2015-08-09	19:21:31	12.5525	9454	100	34.3	9454
3797	2015-08-09	19:36:31	12.5629	9144	100	33.7	9144
3798	2015-08-09	19:51:31	12.5733	8887	100	33.2	8887
3799	2015-08-09	20:06:31	12.5837	322	0	32	322
3800	2015-08-09	20:21:31	12.5942	152	0	31.4	152
3801	2015-08-09	20:36:31	12.6046	37	0	30.9	37
3802	2015-08-09	20:51:31	12.615	4	0	30.3	4
3803	2015-08-09	21:06:31	12.6254	0	0	29.8	0
3804	2015-08-09	21:21:31	12.6358	0	0	29.5	0
3805	2015-08-09	21:36:31	12.6462	0	0	29.2	0
3806	2015-08-09	21:51:31	12.6567	0	0	28.9	0
3807	2015-08-09	22:06:31	12.6671	0	0	28.7	0
3808	2015-08-09	22:21:31	12.6775	0	0	28.4	0
3809	2015-08-09	22:36:31	12.6879	0	0	28.2	0
3810	2015-08-09	22:51:31	12.6983	0	0	28	0
3811	2015-08-09	23:06:31	12.7087	0	0	27.8	0
3812	2015-08-09	23:21:31	12.7192	0	0	27.7	0
3813	2015-08-09	23:36:31	12.7296	0	0	27.6	0
3814	2015-08-09	23:51:31	12.74	0	0	27.3	0
3815	2015-08-10	00:06:31	12.7504	0	0	27.2	0
3816	2015-08-10	00:21:31	12.7608	0	0	27	0
3817	2015-08-10	00:36:31	12.7712	0	0	26.9	0
3818	2015-08-10	00:51:31	12.7817	0	0	26.7	0
3819	2015-08-10	01:06:31	12.7921	0	0	26.6	0
3820	2015-08-10	01:21:31	12.8025	0	0	26.4	0
3821	2015-08-10	01:36:31	12.8129	0	0	26.2	0
3822	2015-08-10	01:51:31	12.8233	0	0	26.1	0
3823	2015-08-10	02:06:31	12.8337	0	0	25.9	0
3824	2015-08-10	02:21:31	12.8442	0	0	25.8	0
3825	2015-08-10	02:36:31	12.8546	0	0	25.8	0
3826	2015-08-10	02:51:31	12.865	0	0	25.7	0
3827	2015-08-10	03:06:31	12.8754	0	0	25.5	0
3828	2015-08-10	03:21:31	12.8858	0	0	25.3	0
3829	2015-08-10	03:36:31	12.8962	0	0	25.1	0
3830	2015-08-10	03:51:31	12.9067	0	0	24.9	0
3831	2015-08-10	04:06:31	12.9171	0	0	24.9	0
3832	2015-08-10	04:21:31	12.9275	0	0	24.8	0
3833	2015-08-10	04:36:31	12.9379	0	0	24.7	0
3834	2015-08-10	04:51:31	12.9483	0	0	24.5	0
3835	2015-08-10	05:06:31	12.9587	0	0	24.4	0
3836	2015-08-10	05:21:31	12.9692	3	0	24.3	3
3837	2015-08-10	05:36:31	12.9796	35	0	24.1	35
3838	2015-08-10	05:51:31	12.99	131	0	24.2	131
3839	2015-08-10	06:06:31	13.0004	6032	100	24.3	6032
3840	2015-08-10	06:21:31	13.0108	9261	100	27.1	9261
3841	2015-08-10	06:36:31	13.0213	9449	100.1	28.5	9449
3842	2015-08-10	06:51:31	13.0317	9745	100	29.4	9745
3843	2015-08-10	07:06:31	13.0421	9930	100	30.1	9930
3844	2015-08-10	07:21:31	13.0525	10114	100	31	10114
3845	2015-08-10	07:36:31	13.0629	10305	100	28.8	10305
3846	2015-08-10	07:51:31	13.0733	10441	100	29.2	10441
3847	2015-08-10	08:06:31	13.0838	10996	100	29.8	10996
3848	2015-08-10	08:21:31	13.0942	11689	100	31.1	11689
3849	2015-08-10	08:36:31	13.1046	12187	100	32.9	12187
3850	2015-08-10	08:51:31	13.115	12552	100	34.5	12552
3851	2015-08-10	09:06:31	13.1254	12730	100.1	35.2	12730
3852	2015-08-10	09:21:31	13.1358	13355	100	35.2	13355
3853	2015-08-10	09:36:31	13.1463	13649	100	35.9	13649
3854	2015-08-10	09:51:31	13.1567	14467	100	36.7	14467
3855	2015-08-10	10:06:31	13.1671	27280	100	37.3	27280
3856	2015-08-10	10:21:31	13.1775	15557	100	37.6	15557
3857	2015-08-10	10:36:31	13.1879	15528	100	39.1	15528
3858	2015-08-10	10:51:31	13.1983	35665	100	39.1	35665
3859	2015-08-10	11:06:31	13.2088	37631	100	40.3	37631
3860	2015-08-10	11:21:31	13.2192	37505	100	36.9	37505
3861	2015-08-10	11:36:31	13.2296	34650	100	36.8	34650
3862	2015-08-10	11:51:31	13.24	16217	100	37.5	16217
3863	2015-08-10	12:06:31	13.2504	16860	100	38.2	16860
3864	2015-08-10	12:21:31	13.2608	18038	100	42	18038
3865	2015-08-10	12:36:31	13.2713	15898	100	40.6	15898
3866	2015-08-10	12:51:31	13.2817	16302	100	41.3	16302
3867	2015-08-10	13:06:31	13.2921	14653	100	36.2	14653
3868	2015-08-10	13:21:31	13.3025	24057	100	36.9	24057
3869	2015-08-10	13:36:31	13.3129	18097	100	36.8	18097
3870	2015-08-10	13:51:31	13.3233	23313	100	38.6	23313
3871	2015-08-10	14:06:31	13.3338	18524	100	38.2	18524
3872	2015-08-10	14:21:31	13.3442	32192	100	35.2	32192
3873	2015-08-10	14:36:31	13.3546	13927	100	34.7	13927
3874	2015-08-10	14:51:31	13.365	25493	100	35.4	25493
3875	2015-08-10	15:06:31	13.3754	16060	100	35.5	16060
3876	2015-08-10	15:21:31	13.3858	13489	100	35.6	13489
3877	2015-08-10	15:36:31	13.3963	14691	100	35.5	14691
3878	2015-08-10	15:51:31	13.4067	14918	100	35.4	14918
3879	2015-08-10	16:06:31	13.4171	12811	100	34.8	12811
3880	2015-08-10	16:21:31	13.4275	17516	100	34.3	17516
3881	2015-08-10	16:36:31	13.4379	14153	100	33.3	14153
3882	2015-08-10	16:51:31	13.4483	19096	100	33.2	19096
3883	2015-08-10	17:06:31	13.4588	13520	100	33.2	13520
3884	2015-08-10	17:21:31	13.4692	12530	99.9	33.2	12530
3885	2015-08-10	17:36:31	13.4796	11811	100	36.3	11811
3886	2015-08-10	17:51:31	13.49	11377	100	37.1	11377
3887	2015-08-10	18:06:31	13.5004	10771	100	37.1	10771
3888	2015-08-10	18:21:31	13.5108	10444	100	36.9	10444
3889	2015-08-10	18:36:31	13.5213	9901	100	36.5	9901
3890	2015-08-10	18:51:31	13.5317	9637	100	36.2	9637
3891	2015-08-10	19:06:31	13.5421	9436	100.1	35.9	9436
3892	2015-08-10	19:21:31	13.5525	9408	100	35.6	9408
3893	2015-08-10	19:36:31	13.5629	9178	100	35.4	9178
3894	2015-08-10	19:51:31	13.5734	9009	100	35.1	9009
3895	2015-08-10	20:06:31	13.5838	424	0	34.1	424
3896	2015-08-10	20:21:31	13.5942	177	0	32.9	177
3897	2015-08-10	20:36:31	13.6046	36	0	32	36
3898	2015-08-10	20:51:31	13.615	2	0	31.3	2
3899	2015-08-10	21:06:31	13.6254	0	0	30.7	0
3900	2015-08-10	21:21:31	13.6359	0	0	30.5	0
3901	2015-08-10	21:36:31	13.6463	0	0	30.1	0
3902	2015-08-10	21:51:31	13.6567	0	0	29.8	0
3903	2015-08-10	22:06:31	13.6671	0	0	29.5	0
3904	2015-08-10	22:21:31	13.6775	0	0	29.2	0
3905	2015-08-10	22:36:31	13.6879	0	0	28.9	0
3906	2015-08-10	22:51:31	13.6984	0	0	28.8	0
3907	2015-08-10	23:06:31	13.7088	0	0	28.6	0
3908	2015-08-10	23:21:31	13.7192	0	0	28.4	0
3909	2015-08-10	23:36:31	13.7296	0	0	28.2	0
3910	2015-08-10	23:51:31	13.74	0	0	28	0
3911	2015-08-11	00:06:31	13.7504	0	0	27.8	0
3912	2015-08-11	00:21:31	13.7609	0	0	27.7	0
3913	2015-08-11	00:36:31	13.7713	0	0	27.4	0
3914	2015-08-11	00:51:31	13.7817	0	0	27.2	0
3915	2015-08-11	01:06:31	13.7921	0	0	27	0
3916	2015-08-11	01:21:31	13.8025	0	0	26.7	0
3917	2015-08-11	01:36:31	13.8129	0	0	26.5	0
3918	2015-08-11	01:51:31	13.8234	0	0	26.2	0
3919	2015-08-11	02:06:31	13.8338	0	0	26.1	0
3920	2015-08-11	02:21:31	13.8442	0	0	26	0
3921	2015-08-11	02:36:31	13.8546	0	0	25.9	0
3922	2015-08-11	02:51:31	13.865	0	0	25.7	0
3923	2015-08-11	03:06:31	13.8754	0	0	25.5	0
3924	2015-08-11	03:21:31	13.8859	0	0	25.4	0
3925	2015-08-11	03:36:31	13.8963	0	0	25.3	0
3926	2015-08-11	03:51:31	13.9067	0	0	25.2	0
3927	2015-08-11	04:06:31	13.9171	0	0	25	0
3928	2015-08-11	04:21:31	13.9275	0	0	24.9	0
3929	2015-08-11	04:36:31	13.9379	0	0	24.7	0
3930	2015-08-11	04:51:31	13.9484	0	0	24.7	0
3931	2015-08-11	05:06:31	13.9588	0	0	24.7	0
3932	2015-08-11	05:21:31	13.9692	2	0	24.6	2
3933	2015-08-11	05:36:31	13.9796	29	0	24.6	29
3934	2015-08-11	05:51:31	13.99	114	0	24.5	114
3935	2015-08-11	06:06:31	14.0004	6064	100	24.7	6064
3936	2015-08-11	06:21:31	14.0109	9202	100	27.6	9202
3937	2015-08-11	06:36:31	14.0213	9396	100	29.2	9396
3938	2015-08-11	06:51:31	14.0317	9624	100	30.1	9624
3939	2015-08-11	07:06:31	14.0421	10020	100	30.8	10020
3940	2015-08-11	07:21:31	14.0525	9844	99.9	28.7	9844
3941	2015-08-11	07:36:31	14.063	10039	100	28.8	10039
3942	2015-08-11	07:51:31	14.0734	10734	100	29.2	10734
3943	2015-08-11	08:06:31	14.0838	11180	100	29.8	11180
3944	2015-08-11	08:21:31	14.0942	12024	100	31.1	12024
3945	2015-08-11	08:36:31	14.1046	12343	100	31.7	12343
3946	2015-08-11	08:51:31	14.115	12818	100	33	12818
3947	2015-08-11	09:06:31	14.1255	13278	100	34.6	13278
3948	2015-08-11	09:21:31	14.1359	13649	100	35.3	13649
3949	2015-08-11	09:36:31	14.1463	13873	100.1	36.4	13873
3950	2015-08-11	09:51:31	14.1567	14869	100	36.6	14869
3951	2015-08-11	10:06:31	14.1671	26904	100	37.3	26904
3952	2015-08-11	10:21:31	14.1775	15873	100	38	15873
3953	2015-08-11	10:36:31	14.188	18299	100	38.3	18299
3954	2015-08-11	10:51:31	14.1984	35158	100	39.7	35158
3955	2015-08-11	11:06:31	14.2088	37065	100	40.2	37065
3956	2015-08-11	11:21:31	14.2192	36393	100	40.1	36393
3957	2015-08-11	11:36:31	14.2296	34433	100	41.5	34433
3958	2015-08-11	11:51:31	14.24	17315	100	41.5	17315
3959	2015-08-11	12:06:31	14.2505	17773	100	43.8	17773
3960	2015-08-11	12:21:31	14.2609	19248	100	43.6	19248
3961	2015-08-11	12:36:31	14.2713	17866	99.9	44.1	17866
3962	2015-08-11	12:51:31	14.2817	18000	100	45.2	18000
3963	2015-08-11	13:06:31	14.2921	19218	100	40	19218
3964	2015-08-11	13:21:31	14.3025	16121	100	36.9	16121
3965	2015-08-11	13:36:31	14.313	18340	100	37.3	18340
3966	2015-08-11	13:51:31	14.3234	23021	100	38.3	23021
3967	2015-08-11	14:06:31	14.3338	14842	100	36.6	14842
3968	2015-08-11	14:21:31	14.3442	15929	100	34.6	15929
3969	2015-08-11	14:36:31	14.3546	32968	100	34.7	32968
3970	2015-08-11	14:51:31	14.365	33268	100	34.6	33268
3971	2015-08-11	15:06:31	14.3755	17613	100	34.8	17613
3972	2015-08-11	15:21:31	14.3859	15873	100	35.2	15873
3973	2015-08-11	15:36:31	14.3963	15827	100	35.6	15827
3974	2015-08-11	15:51:31	14.4067	12712	100	33.9	12712
3975	2015-08-11	16:06:31	14.4171	13729	100	33.3	13729
3976	2015-08-11	16:21:31	14.4275	12428	100	32.1	12428
3977	2015-08-11	16:36:31	14.438	12486	100	31.4	12486
3978	2015-08-11	16:51:31	14.4484	11432	100	30.3	11432
3979	2015-08-11	17:06:31	14.4588	11495	100	29.8	11495
3980	2015-08-11	17:21:31	14.4692	12942	100	28.9	12942
3981	2015-08-11	17:36:31	14.4796	12238	100	29.6	12238
3982	2015-08-11	17:51:31	14.49	11448	100	29.7	11448
3983	2015-08-11	18:06:31	14.5005	11970	100.1	33.7	11970
3984	2015-08-11	18:21:31	14.5109	11381	100	35.3	11381
3985	2015-08-11	18:36:31	14.5213	9687	100	35.2	9687
3986	2015-08-11	18:51:31	14.5317	9664	100	34.2	9664
3987	2015-08-11	19:06:31	14.5421	9759	100	33.7	9759
3988	2015-08-11	19:21:31	14.5525	9528	100	33.4	9528
3989	2015-08-11	19:36:31	14.563	9183	100	33.2	9183
3990	2015-08-11	19:51:31	14.5734	9027	100	33	9027
3991	2015-08-11	20:06:31	14.5838	214	0	32.3	214
3992	2015-08-11	20:21:31	14.5942	69	0	31	69
3993	2015-08-11	20:36:31	14.6046	17	0	31	17
3994	2015-08-11	20:51:31	14.6151	1	0	30.7	1
3995	2015-08-11	21:06:31	14.6255	0	0	30.4	0
3996	2015-08-11	21:21:31	14.6359	0	0	30.2	0
3997	2015-08-11	21:36:31	14.6463	0	0	30	0
3998	2015-08-11	21:51:31	14.6567	0	0	29.8	0
3999	2015-08-11	22:06:31	14.6671	0	0	29.6	0
4000	2015-08-11	22:21:31	14.6776	0	0	29.5	0
4001	2015-08-11	22:36:31	14.688	0	0	29.4	0
4002	2015-08-11	22:51:31	14.6984	0	0	29.3	0
4003	2015-08-11	23:06:31	14.7088	0	0	28.9	0
4004	2015-08-11	23:21:31	14.7192	0	0	28.9	0
4005	2015-08-11	23:36:31	14.7296	0	0	28.8	0
4006	2015-08-11	23:51:31	14.7401	0	0	28.5	0
4007	2015-08-12	00:06:31	14.7505	0	0	28.3	0
4008	2015-08-12	00:21:31	14.7609	0	0	28.3	0
4009	2015-08-12	00:36:31	14.7713	0	0	28.3	0
4010	2015-08-12	00:51:31	14.7817	0	0	28.1	0
4011	2015-08-12	01:06:31	14.7921	0	0	28	0
4012	2015-08-12	01:21:31	14.8026	0	0	27.9	0
4013	2015-08-12	01:36:31	14.813	0	0	27.7	0
4014	2015-08-12	01:51:31	14.8234	0	0	27.6	0
4015	2015-08-12	02:06:31	14.8338	0	0	27.4	0
4016	2015-08-12	02:21:31	14.8442	0	0	27.1	0
4017	2015-08-12	02:36:31	14.8546	0	0	26.9	0
4018	2015-08-12	02:51:31	14.8651	0	0	26.7	0
4019	2015-08-12	03:06:31	14.8755	0	0	26.5	0
4020	2015-08-12	03:21:31	14.8859	0	0	26.3	0
4021	2015-08-12	03:36:31	14.8963	0	0	26.2	0
4022	2015-08-12	03:51:31	14.9067	0	0	26	0
4023	2015-08-12	04:06:31	14.9171	0	0	26	0
4024	2015-08-12	04:21:31	14.9276	0	0	25.8	0
4025	2015-08-12	04:36:31	14.938	0	0	25.7	0
4026	2015-08-12	04:51:31	14.9484	0	0	25.5	0
4027	2015-08-12	05:06:31	14.9588	0	0	25.3	0
4028	2015-08-12	05:21:31	14.9692	2	0	25.1	2
4029	2015-08-12	05:36:31	14.9796	22	0	24.9	22
4030	2015-08-12	05:51:31	14.9901	98	0	24.9	98
4031	2015-08-12	06:06:31	15.0005	6323	100	25	6323
4032	2015-08-12	06:21:31	15.0109	9008	100	27.8	9008
4033	2015-08-12	06:36:31	15.0213	9153	100	29.2	9153
4034	2015-08-12	06:51:31	15.0317	9422	100	30	9422
4035	2015-08-12	07:06:31	15.0421	10075	100	30.5	10075
4036	2015-08-12	07:21:31	15.0526	10199	100	28.9	10199
4037	2015-08-12	07:36:31	15.063	10373	100	29	10373
4038	2015-08-12	07:51:31	15.0734	10401	99.9	29.4	10401
4039	2015-08-12	08:06:31	15.0838	11321	100	30	11321
4040	2015-08-12	08:21:31	15.0942	12393	100	31.2	12393
4041	2015-08-12	08:36:31	15.1047	12286	100	32.4	12286
4042	2015-08-12	08:51:31	15.1151	13367	100	34.1	13367
4043	2015-08-12	09:06:31	15.1255	13372	100	35	13372
4044	2015-08-12	09:21:31	15.1359	14067	100	35.5	14067
4045	2015-08-12	09:36:31	15.1463	15270	100.1	36.3	15270
4046	2015-08-12	09:51:31	15.1567	15849	100	37.1	15849
4047	2015-08-12	10:06:31	15.1672	21975	100	37.8	21975
4048	2015-08-12	10:21:31	15.1776	16833	100	37.8	16833
4049	2015-08-12	10:36:31	15.188	23633	100	39.1	23633
4050	2015-08-12	10:51:31	15.1984	28870	100	38.8	28870
4051	2015-08-12	11:06:31	15.2088	27938	100	37	27938
4052	2015-08-12	11:21:31	15.2192	31314	100	38.4	31314
4053	2015-08-12	11:36:31	15.2297	33415	100	38.4	33415
4054	2015-08-12	11:51:31	15.2401	17571	100	38.1	17571
4055	2015-08-12	12:06:31	15.2505	19324	100	38.7	19324
4056	2015-08-12	12:21:31	15.2609	20035	100	40.1	20035
4057	2015-08-12	12:36:31	15.2713	19415	100	40.6	19415
4058	2015-08-12	12:51:31	15.2817	18784	100.1	38.4	18784
4059	2015-08-12	13:06:31	15.2922	20130	100	36.1	20130
4060	2015-08-12	13:21:31	15.3026	20182	100	35.6	20182
4061	2015-08-12	13:36:31	15.313	19139	100	34.6	19139
4062	2015-08-12	13:51:31	15.3234	30693	100	35.9	30693
4063	2015-08-12	14:06:31	15.3338	17514	100	36	17514
4064	2015-08-12	14:21:31	15.3442	36653	100	35.8	36653
4065	2015-08-12	14:36:31	15.3547	37135	100	35.3	37135
4066	2015-08-12	14:51:31	15.3651	36202	100	35.4	36202
4067	2015-08-12	15:06:31	15.3755	16548	100	35.3	16548
4068	2015-08-12	15:21:31	15.3859	14759	100	35.8	14759
4069	2015-08-12	15:36:31	15.3963	13619	100	35.3	13619
4070	2015-08-12	15:51:31	15.4067	13300	100	34.9	13300
4071	2015-08-12	16:06:31	15.4172	13216	100	34.5	13216
4072	2015-08-12	16:21:31	15.4276	21126	100	34.1	21126
4073	2015-08-12	16:36:31	15.438	13895	100	33.8	13895
4074	2015-08-12	16:51:31	15.4484	20708	100	34.4	20708
4075	2015-08-12	17:06:31	15.4588	12008	100	37.1	12008
4076	2015-08-12	17:21:31	15.4692	11331	100	36.9	11331
4077	2015-08-12	17:36:31	15.4797	10066	100	36.6	10066
4078	2015-08-12	17:51:31	15.4901	8767	100	35.2	8767
4079	2015-08-12	18:06:31	15.5005	9490	100	35.4	9490
4080	2015-08-12	18:21:31	15.5109	9542	100	35.1	9542
4081	2015-08-12	18:36:31	15.5213	9310	100	35	9310
4082	2015-08-12	18:51:31	15.5317	8877	100	34.7	8877
4083	2015-08-12	19:06:31	15.5422	8563	100	34.5	8563
4084	2015-08-12	19:21:31	15.5526	8207	100	34.3	8207
4085	2015-08-12	19:36:31	15.563	7692	100	33.8	7692
4086	2015-08-12	19:51:31	15.5734	7531	100	33.5	7531
4087	2015-08-12	20:06:31	15.5838	165	0	32.6	165
4088	2015-08-12	20:21:31	15.5942	62	0	31.5	62
4089	2015-08-12	20:36:31	15.6047	15	0	30.9	15
4090	2015-08-12	20:51:31	15.6151	1	0	30.7	1
4091	2015-08-12	21:06:31	15.6255	0	0	30.4	0
4092	2015-08-12	21:21:31	15.6359	0	0	30.1	0
4093	2015-08-12	21:36:31	15.6463	0	0	29.8	0
4094	2015-08-12	21:51:31	15.6568	0	0	29.4	0
4095	2015-08-12	22:06:31	15.6672	0	0	29.2	0
4096	2015-08-12	22:21:31	15.6776	0	0	28.9	0
4097	2015-08-12	22:36:31	15.688	0	0	28.7	0
4098	2015-08-12	22:51:31	15.6984	0	0	28.4	0
4099	2015-08-12	23:06:31	15.7088	0	0	28.2	0
4100	2015-08-12	23:21:31	15.7193	0	0	28.1	0
4101	2015-08-12	23:36:31	15.7297	0	0	27.9	0
4102	2015-08-12	23:51:31	15.7401	0	0	27.7	0
4103	2015-08-13	00:06:31	15.7505	0	0	27.6	0
4104	2015-08-13	00:21:31	15.7609	0	0	27.5	0
4105	2015-08-13	00:36:31	15.7713	0	0	27.4	0
4106	2015-08-13	00:51:31	15.7818	0	0	27.3	0
4107	2015-08-13	01:06:31	15.7922	0	0	27.2	0
4108	2015-08-13	01:21:31	15.8026	0	0	27.2	0
4109	2015-08-13	01:36:31	15.813	0	0	27	0
4110	2015-08-13	01:51:31	15.8234	0	0	27	0
4111	2015-08-13	02:06:31	15.8338	0	0	26.8	0
4112	2015-08-13	02:21:31	15.8443	0	0	26.6	0
4113	2015-08-13	02:36:31	15.8547	0	0	26.5	0
4114	2015-08-13	02:51:31	15.8651	0	0	26.4	0
4115	2015-08-13	03:06:31	15.8755	0	0	26.4	0
4116	2015-08-13	03:21:31	15.8859	0	0	26.3	0
4117	2015-08-13	03:36:31	15.8963	0	0	26.2	0
4118	2015-08-13	03:51:31	15.9068	0	0	26.2	0
4119	2015-08-13	04:06:31	15.9172	0	0	26.2	0
4120	2015-08-13	04:21:31	15.9276	0	0	26	0
4121	2015-08-13	04:36:31	15.938	0	0	26	0
4122	2015-08-13	04:51:31	15.9484	0	0	25.9	0
4123	2015-08-13	05:06:31	15.9588	0	0	25.9	0
4124	2015-08-13	05:21:31	15.9693	0	0	25.8	0
4125	2015-08-13	05:36:31	15.9797	13	0	25.7	13
4126	2015-08-13	05:51:31	15.9901	64	0	25.6	64
4127	2015-08-13	06:06:31	16.0005	5320	100	25.7	5320
4128	2015-08-13	06:21:31	16.0109	8377	100	28.5	8377
4129	2015-08-13	06:36:31	16.0213	8833	100	29.8	8833
4130	2015-08-13	06:51:31	16.0318	8844	100	30.6	8844
4131	2015-08-13	07:06:31	16.0422	8674	100	28.8	8674
4132	2015-08-13	07:21:31	16.0526	13550	99.9	28.6	13550
4133	2015-08-13	07:36:31	16.063	14026	100	28.9	14026
4134	2015-08-13	07:51:31	16.0734	14290	99.9	29.4	14290
4135	2015-08-13	08:06:31	16.0838	14650	100	29.8	14650
4136	2015-08-13	08:21:31	16.0943	15595	100	30.8	15595
4137	2015-08-13	08:36:31	16.1047	20945	100	32.4	20945
4138	2015-08-13	08:51:31	16.1151	16981	100	31.1	16981
4139	2015-08-13	09:06:31	16.1255	17322	100	32.5	17322
4140	2015-08-13	09:21:31	16.1359	26669	100	33.4	26669
4141	2015-08-13	09:36:31	16.1464	28680	100	34.2	28680
4142	2015-08-13	09:51:31	16.1568	28041	100	35.3	28041
4143	2015-08-13	10:06:31	16.1672	18919	100	35.5	18919
1	2015-08-13	10:22:44	16.1776	32122	100	32.6	32122
2	2015-08-13	10:37:44	16.188	36896	100	30.8	36896
3	2015-08-13	10:52:44	16.1984	30020	100	31.5	30020
4	2015-08-13	11:07:44	16.2089	37999	100	31.7	37999
5	2015-08-13	11:22:44	16.2193	26854	100	32.8	26854
6	2015-08-13	11:37:44	16.2297	38066	100	33.7	38066
7	2015-08-13	11:52:44	16.2401	40809	100	34	40809
8	2015-08-13	12:07:44	16.2505	40233	100	35.1	40233
9	2015-08-13	12:22:44	16.2609	31012	100	35.7	31012
10	2015-08-13	12:37:44	16.2714	20990	100	35.8	20990
11	2015-08-13	12:52:44	16.2818	21133	100	36.4	21133
12	2015-08-13	13:07:44	16.2922	31551	100	35.3	31551
13	2015-08-13	13:22:44	16.3026	38391	100.3	35.2	38391
14	2015-08-13	13:37:44	16.313	20805	100	35.5	20805
15	2015-08-13	13:52:44	16.3234	20033	100	36.9	20033
16	2015-08-13	14:07:44	16.3339	23774	100	35.8	23774
17	2015-08-13	14:22:44	16.3443	31048	100	35.7	31048
18	2015-08-13	14:37:44	16.3547	36016	100	35.6	36016
19	2015-08-13	14:52:44	16.3651	37498	100	35.7	37498
20	2015-08-13	15:07:44	16.3755	19487	100	35	19487
21	2015-08-13	15:22:44	16.3859	35476	100	34.6	35476
22	2015-08-13	15:37:44	16.3964	18197	100	34.4	18197
23	2015-08-13	15:52:44	16.4068	17538	100.1	34.1	17538
24	2015-08-13	16:07:44	16.4172	17774	100	34.1	17774
25	2015-08-13	16:22:44	16.4276	16529	100	33.5	16529
26	2015-08-13	16:37:44	16.438	16289	100	33.1	16289
27	2015-08-13	16:52:44	16.4484	15868	100	32.7	15868
28	2015-08-13	17:07:44	16.4589	15009	100	32.1	15009
29	2015-08-13	17:22:44	16.4693	14709	100	31.9	14709
30	2015-08-13	17:37:44	16.4797	14335	100	34.5	14335
31	2015-08-13	17:52:44	16.4901	13946	100	35.6	13946
32	2015-08-13	18:07:44	16.5005	13636	100	35.8	13636
33	2015-08-13	18:22:44	16.5109	13376	100	35.7	13376
34	2015-08-13	18:37:44	16.5214	12935	100	35.4	12935
35	2015-08-13	18:52:44	16.5318	12635	100	35.2	12635
36	2015-08-13	19:07:44	16.5422	12220	100	34.9	12220
37	2015-08-13	19:22:44	16.5526	12103	100	34.5	12103
38	2015-08-13	19:37:44	16.563	11776	100	34.1	11776
39	2015-08-13	19:52:44	16.5734	11593	100	33.7	11593
40	2015-08-13	20:07:44	16.5839	187	0	32.6	187
41	2015-08-13	20:22:44	16.5943	72	0	31.4	72
42	2015-08-13	20:37:44	16.6047	15	0	30.9	15
43	2015-08-13	20:52:44	16.6151	0	0	30.5	0
44	2015-08-13	21:07:44	16.6255	0	0	30.1	0
45	2015-08-13	21:22:44	16.6359	0	0	29.8	0
46	2015-08-13	21:37:44	16.6464	0	0	29.5	0
47	2015-08-13	21:52:44	16.6568	0	0	29.1	0
48	2015-08-13	22:07:44	16.6672	0	0	28.9	0
49	2015-08-13	22:22:44	16.6776	0	0	28.5	0
50	2015-08-13	22:37:44	16.688	0	0	28.4	0
51	2015-08-13	22:52:44	16.6985	0	0	28.3	0
52	2015-08-13	23:07:44	16.7089	0	0	28.2	0
53	2015-08-13	23:22:44	16.7193	0	0	28	0
54	2015-08-13	23:37:44	16.7297	0	0	27.8	0
55	2015-08-13	23:52:44	16.7401	0	0	27.6	0
56	2015-08-14	00:07:44	16.7505	0	0	27.5	0
57	2015-08-14	00:22:44	16.761	0	0	27.3	0
58	2015-08-14	00:37:44	16.7714	0	0	27.2	0
59	2015-08-14	00:52:44	16.7818	0	0	27	0
60	2015-08-14	01:07:44	16.7922	0	0	26.9	0
61	2015-08-14	01:22:44	16.8026	0	0	26.7	0
62	2015-08-14	01:37:44	16.813	0	0	26.6	0
63	2015-08-14	01:52:44	16.8235	0	0	26.5	0
64	2015-08-14	02:07:44	16.8339	0	0	26.4	0
65	2015-08-14	02:22:44	16.8443	0	0	26.3	0
66	2015-08-14	02:37:44	16.8547	0	0	26.3	0
67	2015-08-14	02:52:44	16.8651	0	0	26.2	0
68	2015-08-14	03:07:44	16.8755	0	0	26.1	0
69	2015-08-14	03:22:44	16.886	0	0	26	0
70	2015-08-14	03:37:44	16.8964	0	0	25.8	0
71	2015-08-14	03:52:44	16.9068	0	0	25.7	0
72	2015-08-14	04:07:44	16.9172	0	0	25.7	0
73	2015-08-14	04:22:44	16.9276	0	0	25.6	0
74	2015-08-14	04:37:44	16.938	0	0	25.4	0
75	2015-08-14	04:52:44	16.9485	0	0	25.2	0
76	2015-08-14	05:07:44	16.9589	0	0	25.1	0
77	2015-08-14	05:22:44	16.9693	1	0	24.9	1
78	2015-08-14	05:37:44	16.9797	22	0	24.7	22
79	2015-08-14	05:52:44	16.9901	96	0	24.6	96
80	2015-08-14	06:07:44	17.0005	10242	100	25	10242
81	2015-08-14	06:22:44	17.011	12027	100	27.8	12027
82	2015-08-14	06:37:44	17.0214	12394	100	29.3	12394
83	2015-08-14	06:52:44	17.0318	12696	100	30	12696
84	2015-08-14	07:07:44	17.0422	13491	100	30.7	13491
85	2015-08-14	07:22:44	17.0526	13625	100	29.4	13625
86	2015-08-14	07:37:44	17.063	13651	100	28.9	13651
87	2015-08-14	07:52:44	17.0735	13825	99.9	29.3	13825
88	2015-08-14	08:07:44	17.0839	14328	100	29.9	14328
89	2015-08-14	08:22:44	17.0943	15720	100	31.3	15720
90	2015-08-14	08:37:44	17.1047	25291	100	33.4	25291
91	2015-08-14	08:52:44	17.1151	24259	100	35.3	24259
92	2015-08-14	09:07:44	17.1255	16421	100	35.1	16421
93	2015-08-14	09:22:44	17.136	18630	100	34.2	18630
94	2015-08-14	09:37:44	17.1464	21461	100	34.4	21461
95	2015-08-14	09:52:44	17.1568	27332	100	30.3	27332
96	2015-08-14	10:07:44	17.1672	19086	100	29.7	19086
97	2015-08-14	10:22:44	17.1776	34919	100	29.9	34919
98	2015-08-14	10:37:44	17.1881	28443	100	30.5	28443
99	2015-08-14	10:52:44	17.1985	40099	100	31.7	40099
100	2015-08-14	11:07:44	17.2089	33279	100	32.4	33279
101	2015-08-14	11:22:44	17.2193	42359	100	33.6	42359
102	2015-08-14	11:37:44	17.2297	33460	100	34.8	33460
103	2015-08-14	11:52:44	17.2401	44303	100	36.3	44303
104	2015-08-14	12:07:44	17.2506	45395	100	38.1	45395
105	2015-08-14	12:22:44	17.261	41114	100	38	41114
106	2015-08-14	12:37:44	17.2714	19637	100	38.3	19637
107	2015-08-14	12:52:44	17.2818	20338	100	38.3	20338
108	2015-08-14	13:07:44	17.2922	19042	100	36.2	19042
109	2015-08-14	13:22:44	17.3026	43454	100.2	36.1	43454
110	2015-08-14	13:37:44	17.3131	22758	100	37.6	22758
111	2015-08-14	13:52:44	17.3235	19500	100	38.4	19500
112	2015-08-14	14:07:44	17.3339	19770	100	37.4	19770
113	2015-08-14	14:22:44	17.3443	20266	100	37	20266
114	2015-08-14	14:37:44	17.3547	43346	100	37	43346
115	2015-08-14	14:52:44	17.3651	14333	100	36.4	14333
116	2015-08-14	15:07:44	17.3756	18625	100	36.4	18625
117	2015-08-14	15:22:44	17.386	37089	100	36.7	37089
118	2015-08-14	15:37:44	17.3964	17064	100	36	17064
119	2015-08-14	15:52:44	17.4068	16480	100.1	36.4	16480
120	2015-08-14	16:07:44	17.4172	14277	100	35	14277
121	2015-08-14	16:22:44	17.4276	14992	100	35.2	14992
122	2015-08-14	16:37:44	17.4381	16448	100	34.5	16448
123	2015-08-14	16:52:44	17.4485	14294	100	33.6	14294
124	2015-08-14	17:07:44	17.4589	13636	100	36.2	13636
125	2015-08-14	17:22:44	17.4693	14931	100	37.3	14931
126	2015-08-14	17:37:44	17.4797	14200	100	36.6	14200
127	2015-08-14	17:52:44	17.4901	11976	100	36.1	11976
128	2015-08-14	18:07:44	17.5006	11926	100	34.8	11926
129	2015-08-14	18:22:44	17.511	11610	100	34.6	11610
130	2015-08-14	18:37:44	17.5214	11662	100	35	11662
131	2015-08-14	18:52:44	17.5318	11601	100	34.7	11601
132	2015-08-14	19:07:44	17.5422	11603	100	34.4	11603
133	2015-08-14	19:22:44	17.5526	11655	100	34.2	11655
134	2015-08-14	19:37:44	17.5631	11563	100	33.8	11563
135	2015-08-14	19:52:44	17.5735	11355	100	33.7	11355
136	2015-08-14	20:07:44	17.5839	129	0	32.4	129
137	2015-08-14	20:22:44	17.5943	45	0	31.4	45
138	2015-08-14	20:37:44	17.6047	8	0	30.9	8
139	2015-08-14	20:52:44	17.6151	0	0	30.6	0
140	2015-08-14	21:07:44	17.6256	0	0	30.2	0
141	2015-08-14	21:22:44	17.636	0	0	29.8	0
142	2015-08-14	21:37:44	17.6464	0	0	29.7	0
143	2015-08-14	21:52:44	17.6568	0	0	29.5	0
144	2015-08-14	22:07:44	17.6672	0	0	29.5	0
145	2015-08-14	22:22:44	17.6776	0	0	29.4	0
146	2015-08-14	22:37:44	17.6881	0	0	29.3	0
147	2015-08-14	22:52:44	17.6985	0	0	28.9	0
148	2015-08-14	23:07:44	17.7089	0	0	28.7	0
149	2015-08-14	23:22:44	17.7193	0	0	28.3	0
150	2015-08-14	23:37:44	17.7297	0	0	28.1	0
151	2015-08-14	23:52:44	17.7402	0	0	27.9	0
152	2015-08-15	00:07:44	17.7506	0	0	27.8	0
153	2015-08-15	00:22:44	17.761	0	0	27.7	0
154	2015-08-15	00:37:44	17.7714	0	0	27.7	0
155	2015-08-15	00:52:44	17.7818	0	0	27.4	0
156	2015-08-15	01:07:44	17.7922	0	0	27.1	0
157	2015-08-15	01:22:44	17.8027	0	0	26.9	0
158	2015-08-15	01:37:44	17.8131	0	0	26.7	0
159	2015-08-15	01:52:44	17.8235	0	0	26.5	0
160	2015-08-15	02:07:44	17.8339	0	0	26.4	0
161	2015-08-15	02:22:44	17.8443	0	0	26.3	0
162	2015-08-15	02:37:44	17.8547	0	0	26.3	0
163	2015-08-15	02:52:44	17.8652	0	0	26.2	0
164	2015-08-15	03:07:44	17.8756	0	0	25.9	0
165	2015-08-15	03:22:44	17.886	0	0	25.7	0
166	2015-08-15	03:37:44	17.8964	0	0	25.8	0
167	2015-08-15	03:52:44	17.9068	0	0	25.8	0
168	2015-08-15	04:07:44	17.9172	0	0	25.8	0
169	2015-08-15	04:22:44	17.9277	0	0	25.6	0
170	2015-08-15	04:37:44	17.9381	0	0	25.5	0
171	2015-08-15	04:52:44	17.9485	0	0	25.2	0
172	2015-08-15	05:07:44	17.9589	0	0	25	0
173	2015-08-15	05:22:44	17.9693	1	0	25	1
174	2015-08-15	05:37:44	17.9797	18	0	24.9	18
175	2015-08-15	05:52:44	17.9902	90	0	24.8	90
176	2015-08-15	06:07:44	18.0006	10102	100	25.1	10102
177	2015-08-15	06:22:44	18.011	12257	100	27.9	12257
178	2015-08-15	06:37:44	18.0214	12443	100	29.5	12443
179	2015-08-15	06:52:44	18.0318	12845	100	30.4	12845
180	2015-08-15	07:07:44	18.0422	13157	100	30.6	13157
181	2015-08-15	07:22:44	18.0527	13393	100	29.9	13393
182	2015-08-15	07:37:44	18.0631	13537	100	28.7	13537
183	2015-08-15	07:52:44	18.0735	14248	100	29.1	14248
184	2015-08-15	08:07:44	18.0839	14821	100.1	29.7	14821
185	2015-08-15	08:22:44	18.0943	15376	100	30.8	15376
186	2015-08-15	08:37:44	18.1047	22460	100	32.4	22460
187	2015-08-15	08:52:44	18.1152	18510	100	33.6	18510
188	2015-08-15	09:07:44	18.1256	16160	99.9	34.3	16160
189	2015-08-15	09:22:44	18.136	30131	100	35.7	30131
190	2015-08-15	09:37:44	18.1464	31736	100	36	31736
191	2015-08-15	09:52:44	18.1568	25341	100	36.5	25341
192	2015-08-15	10:07:44	18.1672	19486	100	35.8	19486
193	2015-08-15	10:22:44	18.1777	26464	100	35.5	26464
194	2015-08-15	10:37:44	18.1881	29331	100	29.6	29331
195	2015-08-15	10:52:44	18.1985	26466	100	28.7	26466
196	2015-08-15	11:07:44	18.2089	35651	100	28.8	35651
197	2015-08-15	11:22:44	18.2193	38940	100	30.1	38940
198	2015-08-15	11:37:44	18.2298	21531	100	29.8	21531
199	2015-08-15	11:52:44	18.2402	15236	100	28.8	15236
200	2015-08-15	12:07:44	18.2506	22290	100	28	22290
201	2015-08-15	12:22:44	18.261	15777	100	29.2	15777
202	2015-08-15	12:37:44	18.2714	15566	100	28.9	15566
203	2015-08-15	12:52:44	18.2818	18318	100	28.9	18318
204	2015-08-15	13:07:44	18.2923	20213	100	29.8	20213
205	2015-08-15	13:22:44	18.3027	43997	100	30	43997
206	2015-08-15	13:37:44	18.3131	28457	100	28.6	28457
207	2015-08-15	13:52:44	18.3235	22669	100	29.5	22669
208	2015-08-15	14:07:44	18.3339	19828	100	31.1	19828
209	2015-08-15	14:22:44	18.3443	24520	100	32	24520
210	2015-08-15	14:37:44	18.3548	45011	100	32.8	45011
211	2015-08-15	14:52:44	18.3652	43532	100	32.9	43532
212	2015-08-15	15:07:44	18.3756	17668	100	32.6	17668
213	2015-08-15	15:22:44	18.386	40784	100	32.7	40784
214	2015-08-15	15:37:44	18.3964	19135	100	33	19135
215	2015-08-15	15:52:44	18.4068	17170	100	32.8	17170
216	2015-08-15	16:07:44	18.4173	17165	100	32.5	17165
217	2015-08-15	16:22:44	18.4277	15360	100	31.8	15360
218	2015-08-15	16:37:44	18.4381	13902	100	30.4	13902
219	2015-08-15	16:52:44	18.4485	15332	99.9	29.7	15332
220	2015-08-15	17:07:44	18.4589	15295	100	29	15295
221	2015-08-15	17:22:44	18.4693	14575	100	28.9	14575
222	2015-08-15	17:37:44	18.4798	14686	100	28.2	14686
223	2015-08-15	17:52:44	18.4902	13682	100	28.8	13682
224	2015-08-15	18:07:44	18.5006	13045	100	28.7	13045
225	2015-08-15	18:22:44	18.511	12756	100	28.5	12756
226	2015-08-15	18:37:44	18.5214	12643	100	28	12643
227	2015-08-15	18:52:44	18.5318	12405	99.9	27.6	12405
228	2015-08-15	19:07:44	18.5423	12519	100	27.4	12519
229	2015-08-15	19:22:44	18.5527	12188	100	27.1	12188
230	2015-08-15	19:37:44	18.5631	12178	100	26.8	12178
231	2015-08-15	19:52:44	18.5735	11938	100	26.5	11938
232	2015-08-15	20:07:44	18.5839	182	0	26.3	182
233	2015-08-15	20:22:44	18.5943	60	0	26.5	60
234	2015-08-15	20:37:44	18.6048	8	0	25.4	8
235	2015-08-15	20:52:44	18.6152	0	0	25.2	0
236	2015-08-15	21:07:44	18.6256	0	0	24.9	0
237	2015-08-15	21:22:44	18.636	0	0	24.6	0
238	2015-08-15	21:37:44	18.6464	0	0	24.4	0
239	2015-08-15	21:52:44	18.6568	0	0	24.4	0
240	2015-08-15	22:07:44	18.6673	0	0	23.9	0
241	2015-08-15	22:22:44	18.6777	0	0	23.8	0
242	2015-08-15	22:37:44	18.6881	0	0	23.5	0
243	2015-08-15	22:52:44	18.6985	0	0	23.3	0
244	2015-08-15	23:07:44	18.7089	0	0	23.2	0
245	2015-08-15	23:22:44	18.7193	0	0	24.1	0
246	2015-08-15	23:37:44	18.7298	0	0	23.9	0
247	2015-08-15	23:52:44	18.7402	0	0	23.8	0
248	2015-08-16	00:07:44	18.7506	0	0	23.8	0
249	2015-08-16	00:22:44	18.761	0	0	23.8	0
250	2015-08-16	00:37:44	18.7714	0	0	23.8	0
251	2015-08-16	00:52:44	18.7819	0	0	23.9	0
252	2015-08-16	01:07:44	18.7923	0	0	24.2	0
253	2015-08-16	01:22:44	18.8027	0	0	24.1	0
254	2015-08-16	01:37:44	18.8131	0	0	24	0
255	2015-08-16	01:52:44	18.8235	0	0	24	0
256	2015-08-16	02:07:44	18.8339	0	0	23.9	0
257	2015-08-16	02:22:44	18.8444	0	0	23.9	0
258	2015-08-16	02:37:44	18.8548	0	0	23.9	0
259	2015-08-16	02:52:44	18.8652	0	0	23.9	0
260	2015-08-16	03:07:44	18.8756	0	0	23.9	0
261	2015-08-16	03:22:44	18.886	0	0	23.8	0
262	2015-08-16	03:37:44	18.8964	0	0	23.6	0
263	2015-08-16	03:52:44	18.9069	0	0	23.6	0
264	2015-08-16	04:07:44	18.9173	0	0	23.4	0
265	2015-08-16	04:22:44	18.9277	0	0	23.4	0
266	2015-08-16	04:37:44	18.9381	0	0	23.3	0
267	2015-08-16	04:52:44	18.9485	0	0	23.3	0
268	2015-08-16	05:07:44	18.9589	0	0	23.3	0
269	2015-08-16	05:22:44	18.9694	0	0	23.2	0
270	2015-08-16	05:37:44	18.9798	1	0	23.1	1
271	2015-08-16	05:52:44	18.9902	15	0	23.1	15
272	2015-08-16	06:07:44	19.0006	10074	100	23.5	10074
273	2015-08-16	06:22:44	19.011	12430	100	26.2	12430
274	2015-08-16	06:37:44	19.0214	12493	100	27.5	12493
275	2015-08-16	06:52:44	19.0319	12460	100	28.2	12460
276	2015-08-16	07:07:44	19.0423	12309	100	28.3	12309
277	2015-08-16	07:22:44	19.0527	12565	100	28.8	12565
278	2015-08-16	07:37:44	19.0631	13592	100	29.3	13592
279	2015-08-16	07:52:44	19.0735	14513	100	29.7	14513
280	2015-08-16	08:07:44	19.0839	13617	100	29.3	13617
281	2015-08-16	08:22:44	19.0944	18713	100	29.4	18713
282	2015-08-16	08:37:44	19.1048	16180	100	29.7	16180
283	2015-08-16	08:52:44	19.1152	15504	100	29.9	15504
284	2015-08-16	09:07:44	19.1256	15185	100	29.6	15185
285	2015-08-16	09:22:44	19.136	14981	100	29.7	14981
286	2015-08-16	09:37:44	19.1464	14635	100	29.7	14635
287	2015-08-16	09:52:44	19.1569	14786	100	29.9	14786
288	2015-08-16	10:07:44	19.1673	13713	100	29.9	13713
289	2015-08-16	10:22:44	19.1777	13958	100	29.8	13958
290	2015-08-16	10:37:44	19.1881	16811	100	30.2	16811
291	2015-08-16	10:52:44	19.1985	16229	100	30.7	16229
292	2015-08-16	11:07:44	19.2089	17138	100	31.5	17138
293	2015-08-16	11:22:44	19.2194	16712	100	31.9	16712
294	2015-08-16	11:37:44	19.2298	37296	100	33.4	37296
295	2015-08-16	11:52:44	19.2402	16357	100	33.6	16357
296	2015-08-16	12:07:44	19.2506	22104	100	34.7	22104
297	2015-08-16	12:22:44	19.261	35118	100	36.6	35118
298	2015-08-16	12:37:44	19.2715	17460	100	35.2	17460
299	2015-08-16	12:52:44	19.2819	25423	100	35	25423
300	2015-08-16	13:07:44	19.2923	22686	100	36.4	22686
301	2015-08-16	13:22:44	19.3027	37463	100	37.7	37463
302	2015-08-16	13:37:44	19.3131	21052	100	37	21052
303	2015-08-16	13:52:44	19.3235	20508	100	37	20508
304	2015-08-16	14:07:44	19.334	16357	100	36.3	16357
305	2015-08-16	14:22:44	19.3444	18248	100	35.6	18248
306	2015-08-16	14:37:44	19.3548	22279	100	36	22279
307	2015-08-16	14:52:44	19.3652	19027	100.1	36.7	19027
308	2015-08-16	15:07:44	19.3756	17088	100	36.6	17088
309	2015-08-16	15:22:44	19.386	15849	100	36	15849
310	2015-08-16	15:37:44	19.3965	15077	100	34.9	15077
311	2015-08-16	15:52:44	19.4069	16349	100	34.3	16349
312	2015-08-16	16:07:44	19.4173	10613	100	32.6	10613
313	2015-08-16	16:22:44	19.4277	11058	100	29.8	11058
314	2015-08-16	16:37:44	19.4381	12682	100	29	12682
315	2015-08-16	16:52:44	19.4485	11534	100	28.8	11534
316	2015-08-16	17:07:44	19.459	12156	100	28.4	12156
317	2015-08-16	17:22:44	19.4694	12359	100	30.2	12359
318	2015-08-16	17:37:44	19.4798	11709	100	31.4	11709
319	2015-08-16	17:52:44	19.4902	11606	100	28.8	11606
320	2015-08-16	18:07:44	19.5006	11327	100	28.3	11327
321	2015-08-16	18:22:44	19.511	11748	100	28.1	11748
322	2015-08-16	18:37:44	19.5215	11633	100	28.1	11633
323	2015-08-16	18:52:44	19.5319	11678	99.9	28.1	11678
324	2015-08-16	19:07:44	19.5423	11641	100	28.1	11641
325	2015-08-16	19:22:44	19.5527	11445	100	28.1	11445
326	2015-08-16	19:37:44	19.5631	11218	100	27.9	11218
327	2015-08-16	19:52:44	19.5735	10841	100	27.7	10841
328	2015-08-16	20:07:44	19.584	89	0	26.9	89
329	2015-08-16	20:22:44	19.5944	29	0	26.5	29
330	2015-08-16	20:37:44	19.6048	3	0	26.2	3
331	2015-08-16	20:52:44	19.6152	0	0	25.7	0
332	2015-08-16	21:07:44	19.6256	0	0	25.4	0
333	2015-08-16	21:22:44	19.636	0	0	25	0
334	2015-08-16	21:37:44	19.6465	0	0	24.6	0
335	2015-08-16	21:52:44	19.6569	0	0	24.3	0
336	2015-08-16	22:07:44	19.6673	0	0	24.2	0
337	2015-08-16	22:22:44	19.6777	0	0	23.9	0
338	2015-08-16	22:37:44	19.6881	0	0	23.6	0
339	2015-08-16	22:52:44	19.6985	0	0	23.6	0
340	2015-08-16	23:07:44	19.709	0	0	23.4	0
341	2015-08-16	23:22:44	19.7194	0	0	23.3	0
342	2015-08-16	23:37:44	19.7298	0	0	23	0
343	2015-08-16	23:52:44	19.7402	0	0	23	0
344	2015-08-17	00:07:44	19.7506	0	0	22.9	0
345	2015-08-17	00:22:44	19.761	0	0	22.8	0
346	2015-08-17	00:37:44	19.7715	0	0	22.8	0
347	2015-08-17	00:52:44	19.7819	0	0	22.6	0
348	2015-08-17	01:07:44	19.7923	0	0	22.6	0
349	2015-08-17	01:22:44	19.8027	0	0	22.5	0
350	2015-08-17	01:37:44	19.8131	0	0	22.4	0
351	2015-08-17	01:52:44	19.8236	0	0	22.3	0
352	2015-08-17	02:07:44	19.834	0	0	22.2	0
353	2015-08-17	02:22:44	19.8444	0	0	22.2	0
354	2015-08-17	02:37:44	19.8548	0	0	22.2	0
355	2015-08-17	02:52:44	19.8652	0	0	22.1	0
356	2015-08-17	03:07:44	19.8756	0	0	22	0
357	2015-08-17	03:22:44	19.8861	0	0	22	0
358	2015-08-17	03:37:44	19.8965	0	0	21.9	0
359	2015-08-17	03:52:44	19.9069	0	0	21.9	0
360	2015-08-17	04:07:44	19.9173	0	0	22	0
361	2015-08-17	04:22:44	19.9277	0	0	22	0
362	2015-08-17	04:37:44	19.9381	0	0	22.1	0
363	2015-08-17	04:52:44	19.9486	0	0	22.1	0
364	2015-08-17	05:07:44	19.959	0	0	22.1	0
365	2015-08-17	05:22:44	19.9694	0	0	22.2	0
366	2015-08-17	05:37:44	19.9798	2	0	22.2	2
367	2015-08-17	05:52:44	19.9902	18	0	22.2	18
368	2015-08-17	06:07:44	20.0006	9527	100	22.6	9527
369	2015-08-17	06:22:44	20.0111	11597	100	25.3	11597
370	2015-08-17	06:37:44	20.0215	11470	100.1	26.7	11470
371	2015-08-17	06:52:44	20.0319	11690	100	27.2	11690
372	2015-08-17	07:07:44	20.0423	12395	100	27.8	12395
373	2015-08-17	07:22:44	20.0527	12405	100	28.3	12405
374	2015-08-17	07:37:44	20.0631	12236	100	28.3	12236
375	2015-08-17	07:52:44	20.0736	11671	100	26.1	11671
376	2015-08-17	08:07:44	20.084	11924	100	28	11924
377	2015-08-17	08:22:44	20.0944	11888	100	28.1	11888
378	2015-08-17	08:37:44	20.1048	11982	100	28.2	11982
379	2015-08-17	08:52:44	20.1152	12715	100	28.4	12715
380	2015-08-17	09:07:44	20.1256	13273	100	28.6	13273
381	2015-08-17	09:22:44	20.1361	15516	100.1	29.1	15516
382	2015-08-17	09:37:44	20.1465	13538	100	29.1	13538
383	2015-08-17	09:52:44	20.1569	12779	100	28.3	12779
384	2015-08-17	10:07:44	20.1673	11773	100	28.1	11773
385	2015-08-17	10:22:44	20.1777	11365	100.1	27.2	11365
386	2015-08-17	10:37:44	20.1881	11502	100.1	27.4	11502
387	2015-08-17	10:52:44	20.1986	12298	100.1	27.9	12298
388	2015-08-17	11:07:44	20.209	14157	100	27.1	14157
389	2015-08-17	11:22:44	20.2194	14253	100.1	28.3	14253
390	2015-08-17	11:37:44	20.2298	14429	100.1	27.3	14429
391	2015-08-17	11:52:44	20.2402	15112	100.1	27.3	15112
392	2015-08-17	12:07:44	20.2506	13478	100	28.9	13478
393	2015-08-17	12:22:44	20.2611	14379	100	28	14379
394	2015-08-17	12:37:44	20.2715	13418	100	28.9	13418
395	2015-08-17	12:52:44	20.2819	12930	100	28.2	12930
396	2015-08-17	13:07:44	20.2923	14067	100	28.1	14067
397	2015-08-17	13:22:44	20.3027	11890	100.1	27.8	11890
398	2015-08-17	13:37:44	20.3132	12345	100.1	27.4	12345
399	2015-08-17	13:52:44	20.3236	12402	100	27.4	12402
400	2015-08-17	14:07:44	20.334	12857	100	29.2	12857
401	2015-08-17	14:22:44	20.3444	13396	100	29.9	13396
402	2015-08-17	14:37:44	20.3548	12569	100	30.4	12569
403	2015-08-17	14:52:44	20.3652	12807	100	29.9	12807
404	2015-08-17	15:07:44	20.3757	12303	100.1	29.8	12303
405	2015-08-17	15:22:44	20.3861	12531	100	30	12531
406	2015-08-17	15:37:44	20.3965	12345	100	29.6	12345
407	2015-08-17	15:52:44	20.4069	13249	100	29.6	13249
408	2015-08-17	16:07:44	20.4173	12873	100	29.5	12873
409	2015-08-17	16:22:44	20.4277	11962	100	29	11962
410	2015-08-17	16:37:44	20.4382	11534	100	28.1	11534
411	2015-08-17	16:52:44	20.4486	11749	100	27.3	11749
412	2015-08-17	17:07:44	20.459	11872	100	28.9	11872
413	2015-08-17	17:22:44	20.4694	11821	100	29	11821
414	2015-08-17	17:37:44	20.4798	11523	100	29.2	11523
415	2015-08-17	17:52:44	20.4902	11550	100	29.1	11550
416	2015-08-17	18:07:44	20.5007	11716	100.1	29.3	11716
417	2015-08-17	18:22:44	20.5111	11644	100	29.1	11644
418	2015-08-17	18:37:44	20.5215	11256	100	29.1	11256
419	2015-08-17	18:52:44	20.5319	11359	99.9	28.2	11359
420	2015-08-17	19:07:44	20.5423	11276	100	28.8	11276
421	2015-08-17	19:22:44	20.5527	11256	100	28.7	11256
422	2015-08-17	19:37:44	20.5632	11186	100.1	28	11186
423	2015-08-17	19:52:44	20.5736	11103	100	28.2	11103
424	2015-08-17	20:07:44	20.584	17	0	27.2	17
425	2015-08-17	20:22:44	20.5944	6	0	25.4	6
426	2015-08-17	20:37:44	20.6048	0	0	24.4	0
427	2015-08-17	20:52:44	20.6152	0	0	23.7	0
428	2015-08-17	21:07:44	20.6257	0	0	23.3	0
429	2015-08-17	21:22:44	20.6361	0	0	22.9	0
430	2015-08-17	21:37:44	20.6465	0	0	22.5	0
431	2015-08-17	21:52:44	20.6569	0	0	22.3	0
432	2015-08-17	22:07:44	20.6673	0	0	22	0
433	2015-08-17	22:22:44	20.6777	0	0	21.8	0
434	2015-08-17	22:37:44	20.6882	0	0	21.7	0
435	2015-08-17	22:52:44	20.6986	0	0	21.5	0
436	2015-08-17	23:07:44	20.709	0	0	21.5	0
437	2015-08-17	23:22:44	20.7194	0	0	21.3	0
438	2015-08-17	23:37:44	20.7298	0	0	21.2	0
439	2015-08-17	23:52:44	20.7402	0	0	21.1	0
440	2015-08-18	00:07:44	20.7507	0	0	21	0
441	2015-08-18	00:22:44	20.7611	0	0	21	0
442	2015-08-18	00:37:44	20.7715	0	0	20.8	0
443	2015-08-18	00:52:44	20.7819	0	0	20.6	0
444	2015-08-18	01:07:44	20.7923	0	0	20.6	0
445	2015-08-18	01:22:44	20.8027	0	0	20.4	0
446	2015-08-18	01:37:44	20.8132	0	0	20.3	0
[truncated: 1,752 more rows]

## Sheet: datalogger outdoors
One sensor between the containers (air temperature), the other 5 cm deep in the substrate (soil temperature)
Month	Day	Year	Hour	Min	Sec	TemperatureSoil	TemperatureAir	c				Time (days from 30July)	Temperature soil	Temperature air
7	30	15	17	8	48	26.73	26.73					0.708333	26.73	26.73
7	30	15	17	14	48	25.95	25.95					0.7125	25.95	25.95
7	30	15	17	20	48	26.73	26.73					0.716667	26.73	26.73
7	30	15	17	26	48	27.12	27.12					0.720833	27.12	27.12
7	30	15	17	32	48	22.48	23.24					0.725	22.48	23.24
7	30	15	17	38	48	21.71	21.71					0.729167	21.71	21.71
7	30	15	17	44	48	23.24	23.24					0.733333	23.24	23.24
7	30	15	17	50	48	23.24	23.63					0.7375	23.24	23.63
7	30	15	17	56	48	23.24	23.24					0.741667	23.24	23.24
7	30	15	18	2	48	23.24	23.24					0.745833	23.24	23.24
7	30	15	18	8	48	23.24	23.24					0.75	23.24	23.24
7	30	15	18	14	48	23.24	23.24					0.754167	23.24	23.24
7	30	15	18	20	48	22.09	22.48					0.758333	22.09	22.48
7	30	15	18	26	48	22.86	21.33					0.7625	22.86	21.33
7	30	15	18	32	48	22.86	20.95					0.766667	22.86	20.95
7	30	15	18	38	48	22.86	20.95					0.770833	22.86	20.95
7	30	15	18	44	48	22.48	20.95					0.775	22.48	20.95
7	30	15	18	50	48	22.48	20.57					0.779167	22.48	20.57
7	30	15	18	56	48	22.48	20.95					0.783333	22.48	20.95
7	30	15	19	2	48	22.48	20.57					0.7875	22.48	20.57
7	30	15	19	8	48	22.09	20.19					0.791667	22.09	20.19
7	30	2015	19	14	48	22.09	20.19					0.795833	22.09	20.19
7	30	2015	19	20	48	22.09	20.19					0.8	22.09	20.19
7	30	2015	19	26	48	22.09	20.19					0.804167	22.09	20.19
7	30	2015	19	32	48	21.71	20.19					0.808333	21.71	20.19
7	30	2015	19	38	48	21.71	20.19					0.8125	21.71	20.19
7	30	2015	19	44	48	21.71	20.19					0.816667	21.71	20.19
7	30	2015	19	50	48	21.71	19.81					0.820833	21.71	19.81
7	30	2015	19	56	48	21.33	19.81					0.825	21.33	19.81
7	30	2015	20	2	48	21.33	19.81					0.829167	21.33	19.81
7	30	2015	20	8	48	21.33	19.42					0.833333	21.33	19.42
7	30	2015	20	14	48	21.33	19.42					0.8375	21.33	19.42
7	30	2015	20	20	48	20.95	19.42					0.841667	20.95	19.42
7	30	2015	20	26	48	20.95	19.42					0.845833	20.95	19.42
7	30	2015	20	32	48	20.95	19.04					0.85	20.95	19.04
7	30	2015	20	38	48	20.95	18.66					0.854167	20.95	18.66
7	30	2015	20	44	48	20.57	18.66					0.858333	20.57	18.66
7	30	2015	20	50	48	20.57	18.28					0.8625	20.57	18.28
7	30	2015	20	56	48	20.57	18.28					0.866667	20.57	18.28
7	30	2015	21	2	48	20.57	17.9					0.870833	20.57	17.9
7	30	2015	21	8	48	20.19	18.28					0.875	20.19	18.28
7	30	2015	21	14	48	20.19	17.14					0.879167	20.19	17.14
7	30	2015	21	20	48	20.19	16.38					0.883333	20.19	16.38
7	30	2015	21	26	48	20.19	16.76					0.8875	20.19	16.76
7	30	2015	21	32	48	19.81	17.14					0.891667	19.81	17.14
7	30	2015	21	38	48	19.81	17.14					0.895833	19.81	17.14
7	30	2015	21	44	48	19.81	17.14					0.9	19.81	17.14
7	30	2015	21	50	48	19.81	17.14					0.904167	19.81	17.14
7	30	2015	21	56	48	19.42	17.14					0.908333	19.42	17.14
7	30	2015	22	2	48	19.42	17.14					0.9125	19.42	17.14
7	30	2015	22	8	48	19.42	16					0.916667	19.42	16
7	30	2015	22	14	48	19.42	14.85					0.920833	19.42	14.85
7	30	2015	22	20	48	19.04	14.47					0.925	19.04	14.47
7	30	2015	22	26	48	19.04	14.47					0.929167	19.04	14.47
7	30	2015	22	32	48	19.04	14.09					0.933333	19.04	14.09
7	30	2015	22	38	48	19.04	14.47					0.9375	19.04	14.47
7	30	2015	22	44	48	18.66	14.09					0.941667	18.66	14.09
7	30	2015	22	50	48	18.66	14.09					0.945833	18.66	14.09
7	30	2015	22	56	48	18.66	13.7					0.95	18.66	13.7
7	30	2015	23	2	48	18.66	13.32					0.954167	18.66	13.32
7	30	2015	23	8	48	18.28	13.32					0.958333	18.28	13.32
7	30	2015	23	14	48	18.28	13.7					0.9625	18.28	13.7
7	30	2015	23	20	48	18.28	14.09					0.966667	18.28	14.09
7	30	2015	23	26	48	18.28	15.23					0.970833	18.28	15.23
7	30	2015	23	32	48	17.9	15.62					0.975	17.9	15.62
7	30	2015	23	38	48	17.9	15.62					0.979167	17.9	15.62
7	30	2015	23	44	48	17.9	15.23					0.983333	17.9	15.23
7	30	2015	23	50	48	17.9	15.23					0.9875	17.9	15.23
7	30	2015	23	56	48	17.9	15.62					0.991667	17.9	15.62
7	31	2015	0	2	48	17.52	15.62					0.995833	17.52	15.62
7	31	2015	0	8	48	17.52	15.62					1	17.52	15.62
7	31	2015	0	14	48	17.52	15.62					1.00417	17.52	15.62
7	31	2015	0	20	48	17.52	15.62					1.00833	17.52	15.62
7	31	2015	0	26	48	17.52	15.62					1.0125	17.52	15.62
7	31	2015	0	32	48	17.52	15.62					1.01667	17.52	15.62
7	31	2015	0	38	48	17.14	14.85					1.02083	17.14	14.85
7	31	2015	0	44	48	17.14	14.85					1.025	17.14	14.85
7	31	2015	0	50	48	17.14	15.23					1.02917	17.14	15.23
7	31	2015	0	56	48	17.14	14.85					1.03333	17.14	14.85
7	31	2015	1	2	48	17.14	14.85					1.0375	17.14	14.85
7	31	2015	1	8	48	17.14	14.85					1.04167	17.14	14.85
7	31	2015	1	14	48	16.76	14.47					1.04583	16.76	14.47
7	31	2015	1	20	48	16.76	14.09					1.05	16.76	14.09
7	31	2015	1	26	48	16.76	13.32					1.05417	16.76	13.32
7	31	2015	1	32	48	16.76	13.7					1.05833	16.76	13.7
7	31	2015	1	38	48	16.76	13.7					1.0625	16.76	13.7
7	31	2015	1	44	48	16.38	13.7					1.06667	16.38	13.7
7	31	2015	1	50	48	16.38	14.47					1.07083	16.38	14.47
7	31	2015	1	56	48	16.38	14.85					1.075	16.38	14.85
7	31	2015	2	2	48	16.38	14.85					1.07917	16.38	14.85
7	31	2015	2	8	48	16.38	14.85					1.08333	16.38	14.85
7	31	2015	2	14	48	16.38	14.85					1.0875	16.38	14.85
7	31	2015	2	20	48	16.38	14.47					1.09167	16.38	14.47
7	31	2015	2	26	48	16	14.47					1.09583	16	14.47
7	31	2015	2	32	48	16	14.09					1.1	16	14.09
7	31	2015	2	38	48	16	14.47					1.10417	16	14.47
7	31	2015	2	44	48	16	14.09					1.10833	16	14.09
7	31	2015	2	50	48	16	14.09					1.1125	16	14.09
7	31	2015	2	56	48	16	13.7					1.11667	16	13.7
7	31	2015	3	2	48	16	13.7					1.12083	16	13.7
7	31	2015	3	8	48	16	13.7					1.125	16	13.7
7	31	2015	3	14	48	15.62	13.7					1.12917	15.62	13.7
7	31	2015	3	20	48	15.62	13.7					1.13333	15.62	13.7
7	31	2015	3	26	48	15.62	13.7					1.1375	15.62	13.7
7	31	2015	3	32	48	15.62	14.09					1.14167	15.62	14.09
7	31	2015	3	38	48	15.62	13.32					1.14583	15.62	13.32
7	31	2015	3	44	48	15.62	12.93					1.15	15.62	12.93
7	31	2015	3	50	48	15.62	12.93					1.15417	15.62	12.93
7	31	2015	3	56	48	15.62	12.16					1.15833	15.62	12.16
7	31	2015	4	2	48	15.23	12.55					1.1625	15.23	12.55
7	31	2015	4	8	48	15.23	12.93					1.16667	15.23	12.93
7	31	2015	4	14	48	15.23	12.16					1.17083	15.23	12.16
7	31	2015	4	20	48	15.23	12.55					1.175	15.23	12.55
7	31	2015	4	26	48	15.23	12.16					1.17917	15.23	12.16
7	31	2015	4	32	48	15.23	12.16					1.18333	15.23	12.16
7	31	2015	4	38	48	14.85	12.16					1.1875	14.85	12.16
7	31	2015	4	44	48	14.85	12.16					1.19167	14.85	12.16
7	31	2015	4	50	48	14.85	12.16					1.19583	14.85	12.16
7	31	2015	4	56	48	14.85	12.16					1.2	14.85	12.16
7	31	2015	5	2	48	14.85	12.16					1.20417	14.85	12.16
7	31	2015	5	8	48	14.47	12.16					1.20833	14.47	12.16
7	31	2015	5	14	48	14.47	12.16					1.2125	14.47	12.16
7	31	2015	5	20	48	14.47	12.16					1.21667	14.47	12.16
7	31	2015	5	26	48	14.47	12.55					1.22083	14.47	12.55
7	31	2015	5	32	48	14.47	12.55					1.225	14.47	12.55
7	31	2015	5	38	48	14.47	12.55					1.22917	14.47	12.55
7	31	2015	5	44	48	14.09	12.55					1.23333	14.09	12.55
7	31	2015	5	50	48	14.09	12.93					1.2375	14.09	12.93
7	31	2015	5	56	48	14.09	12.55					1.24167	14.09	12.55
7	31	2015	6	2	48	14.09	12.93					1.24583	14.09	12.93
7	31	2015	6	8	48	14.09	12.93					1.25	14.09	12.93
7	31	2015	6	14	48	14.09	12.55					1.25417	14.09	12.55
7	31	2015	6	20	48	14.09	12.55					1.25833	14.09	12.55
7	31	2015	6	26	48	14.09	12.55					1.2625	14.09	12.55
7	31	2015	6	32	48	14.09	12.55					1.26667	14.09	12.55
7	31	2015	6	38	48	14.09	12.93					1.27083	14.09	12.93
7	31	2015	6	44	48	14.09	12.93					1.275	14.09	12.93
7	31	2015	6	50	48	14.09	12.93					1.27917	14.09	12.93
7	31	2015	6	56	48	13.7	13.32					1.28333	13.7	13.32
7	31	2015	7	2	48	13.7	12.93					1.2875	13.7	12.93
7	31	2015	7	8	48	13.7	12.93					1.29167	13.7	12.93
7	31	2015	7	14	48	13.7	13.32					1.29583	13.7	13.32
7	31	2015	7	20	48	13.7	13.32					1.3	13.7	13.32
7	31	2015	7	26	48	13.7	13.7					1.30417	13.7	13.7
7	31	2015	7	32	48	13.7	14.09					1.30833	13.7	14.09
7	31	2015	7	38	48	13.7	14.09					1.3125	13.7	14.09
7	31	2015	7	44	48	13.7	14.47					1.31667	13.7	14.47
7	31	2015	7	50	48	13.7	14.85					1.32083	13.7	14.85
7	31	2015	7	56	48	14.09	15.23					1.325	14.09	15.23
7	31	2015	8	2	48	14.09	15.62					1.32917	14.09	15.62
7	31	2015	8	8	48	14.09	15.62					1.33333	14.09	15.62
7	31	2015	8	14	48	14.09	15.62					1.3375	14.09	15.62
7	31	2015	8	20	48	14.09	16.38					1.34167	14.09	16.38
7	31	2015	8	26	48	14.09	16.38					1.34583	14.09	16.38
7	31	2015	8	32	48	14.09	17.14					1.35	14.09	17.14
7	31	2015	8	38	48	14.47	17.14					1.35417	14.47	17.14
7	31	2015	8	44	48	14.47	17.9					1.35833	14.47	17.9
7	31	2015	8	50	48	14.47	17.9					1.3625	14.47	17.9
7	31	2015	8	56	48	14.85	17.9					1.36667	14.85	17.9
7	31	2015	9	2	48	14.85	18.66					1.37083	14.85	18.66
7	31	2015	9	8	48	14.85	19.42					1.375	14.85	19.42
7	31	2015	9	14	48	15.23	19.81					1.37917	15.23	19.81
7	31	2015	9	20	48	15.23	19.42					1.38333	15.23	19.42
7	31	2015	9	26	48	15.62	19.81					1.3875	15.62	19.81
7	31	2015	9	32	48	15.62	19.81					1.39167	15.62	19.81
7	31	2015	9	38	48	15.62	19.42					1.39583	15.62	19.42
7	31	2015	9	44	48	16	20.19					1.4	16	20.19
7	31	2015	9	50	48	16	20.19					1.40417	16	20.19
7	31	2015	9	56	48	16.38	20.19					1.40833	16.38	20.19
7	31	2015	10	2	48	16.38	20.57					1.4125	16.38	20.57
7	31	2015	10	8	48	16.76	21.71					1.41667	16.76	21.71
7	31	2015	10	14	48	17.14	21.71					1.42083	17.14	21.71
7	31	2015	10	20	48	17.14	23.63					1.425	17.14	23.63
7	31	2015	10	26	48	17.52	24.01					1.42917	17.52	24.01
7	31	2015	10	32	48	17.52	25.17					1.43333	17.52	25.17
7	31	2015	10	38	48	17.9	25.17					1.4375	17.9	25.17
7	31	2015	10	44	48	18.28	25.17					1.44167	18.28	25.17
7	31	2015	10	50	48	18.28	27.91					1.44583	18.28	27.91
7	31	2015	10	56	48	18.66	31.12					1.45	18.66	31.12
7	31	2015	11	2	48	18.66	29.5					1.45417	18.66	29.5
7	31	2015	11	8	48	19.04	37					1.45833	19.04	37
7	31	2015	11	14	48	19.04	41.99					1.4625	19.04	41.99
7	31	2015	11	20	48	19.04	37					1.46667	19.04	37
7	31	2015	11	26	48	19.42	40.59					1.47083	19.42	40.59
7	31	2015	11	32	48	19.42	37					1.475	19.42	37
7	31	2015	11	38	48	19.81	32.76					1.47917	19.81	32.76
7	31	2015	11	44	48	20.19	29.1					1.48333	20.19	29.1
7	31	2015	11	50	48	20.19	26.34					1.4875	20.19	26.34
7	31	2015	11	56	48	20.57	26.34					1.49167	20.57	26.34
7	31	2015	12	2	48	20.57	27.12					1.49583	20.57	27.12
7	31	2015	12	8	48	20.95	26.73					1.5	20.95	26.73
7	31	2015	12	14	48	21.33	26.34					1.50417	21.33	26.34
7	31	2015	12	20	48	21.33	25.17					1.50833	21.33	25.17
7	31	2015	12	26	48	21.71	24.01					1.5125	21.71	24.01
7	31	2015	12	32	48	21.71	25.56					1.51667	21.71	25.56
7	31	2015	12	38	48	22.09	25.56					1.52083	22.09	25.56
7	31	2015	12	44	48	22.09	26.73					1.525	22.09	26.73
7	31	2015	12	50	48	22.09	25.95					1.52917	22.09	25.95
7	31	2015	12	56	48	22.48	26.34					1.53333	22.48	26.34
7	31	2015	13	2	48	22.48	24.01					1.5375	22.48	24.01
7	31	2015	13	8	48	22.86	25.17					1.54167	22.86	25.17
7	31	2015	13	14	48	22.86	25.56					1.54583	22.86	25.56
7	31	2015	13	20	48	23.24	26.34					1.55	23.24	26.34
7	31	2015	13	26	48	23.24	24.4					1.55417	23.24	24.4
7	31	2015	13	32	48	23.63	25.17					1.55833	23.63	25.17
7	31	2015	13	38	48	23.63	24.79					1.5625	23.63	24.79
7	31	2015	13	44	48	23.63	25.17					1.56667	23.63	25.17
7	31	2015	13	50	48	24.01	24.79					1.57083	24.01	24.79
7	31	2015	13	56	48	24.01	24.4					1.575	24.01	24.4
7	31	2015	14	2	48	24.01	24.4					1.57917	24.01	24.4
7	31	2015	14	8	48	24.4	24.01					1.58333	24.4	24.01
7	31	2015	14	14	48	24.4	24.01					1.5875	24.4	24.01
7	31	2015	14	20	48	24.4	24.4					1.59167	24.4	24.4
7	31	2015	14	26	48	24.4	24.4					1.59583	24.4	24.4
7	31	2015	14	32	48	24.4	24.01					1.6	24.4	24.01
7	31	2015	14	38	48	24.79	23.63					1.60417	24.79	23.63
7	31	2015	14	44	48	24.79	24.01					1.60833	24.79	24.01
7	31	2015	14	50	48	24.79	24.01					1.6125	24.79	24.01
7	31	2015	14	56	48	24.79	24.79					1.61667	24.79	24.79
7	31	2015	15	2	48	25.17	24.79					1.62083	25.17	24.79
7	31	2015	15	8	48	25.17	24.79					1.625	25.17	24.79
7	31	2015	15	14	48	25.17	24.4					1.62917	25.17	24.4
7	31	2015	15	20	48	25.56	24.4					1.63333	25.56	24.4
7	31	2015	15	26	48	25.56	24.79					1.6375	25.56	24.79
7	31	2015	15	32	48	25.56	24.4					1.64167	25.56	24.4
7	31	2015	15	38	48	25.95	24.01					1.64583	25.95	24.01
7	31	2015	15	44	48	25.95	24.4					1.65	25.95	24.4
7	31	2015	15	50	48	26.34	24.4					1.65417	26.34	24.4
7	31	2015	15	56	48	26.34	24.4					1.65833	26.34	24.4
7	31	2015	16	2	48	26.34	24.01					1.6625	26.34	24.01
7	31	2015	16	8	48	26.34	24.01					1.66667	26.34	24.01
7	31	2015	16	14	48	26.34	23.63					1.67083	26.34	23.63
7	31	2015	16	20	48	26.73	23.24					1.675	26.73	23.24
7	31	2015	16	26	48	26.73	22.86					1.67917	26.73	22.86
7	31	2015	16	32	48	26.73	23.24					1.68333	26.73	23.24
7	31	2015	16	38	48	26.34	23.24					1.6875	26.34	23.24
7	31	2015	16	44	48	26.34	23.24					1.69167	26.34	23.24
7	31	2015	16	50	48	26.34	23.24					1.69583	26.34	23.24
7	31	2015	16	56	48	26.34	23.24					1.7	26.34	23.24
7	31	2015	17	2	48	26.73	23.24					1.70417	26.73	23.24
7	31	2015	17	8	48	26.73	23.24					1.70833	26.73	23.24
7	31	2015	17	14	48	26.73	22.86					1.7125	26.73	22.86
7	31	2015	17	20	48	26.73	22.48					1.71667	26.73	22.48
7	31	2015	17	26	48	26.73	22.86					1.72083	26.73	22.86
7	31	2015	17	32	48	26.73	22.86					1.725	26.73	22.86
7	31	2015	17	38	48	26.73	22.86					1.72917	26.73	22.86
7	31	2015	17	44	48	26.73	22.86					1.73333	26.73	22.86
7	31	2015	17	50	48	26.73	22.48					1.7375	26.73	22.48
7	31	2015	17	56	48	26.73	22.09					1.74167	26.73	22.09
7	31	2015	18	2	48	26.73	22.09					1.74583	26.73	22.09
7	31	2015	18	8	48	26.73	22.09					1.75	26.73	22.09
7	31	2015	18	14	48	26.73	22.09					1.75417	26.73	22.09
7	31	2015	18	20	48	26.34	22.09					1.75833	26.34	22.09
7	31	2015	18	26	48	26.34	21.71					1.7625	26.34	21.71
7	31	2015	18	32	48	26.34	21.71					1.76667	26.34	21.71
7	31	2015	18	38	48	26.34	21.71					1.77083	26.34	21.71
7	31	2015	18	44	48	26.34	21.71					1.775	26.34	21.71
7	31	2015	18	50	48	26.34	21.33					1.77917	26.34	21.33
7	31	2015	18	56	48	25.95	21.71					1.78333	25.95	21.71
7	31	2015	19	2	48	25.95	21.33					1.7875	25.95	21.33
7	31	2015	19	8	48	25.95	21.33					1.79167	25.95	21.33
7	31	2015	19	14	48	25.95	20.95					1.79583	25.95	20.95
7	31	2015	19	20	48	25.56	20.95					1.8	25.56	20.95
7	31	2015	19	26	48	25.56	20.95					1.80417	25.56	20.95
7	31	2015	19	32	48	25.56	20.95					1.80833	25.56	20.95
7	31	2015	19	38	48	25.17	20.57					1.8125	25.17	20.57
7	31	2015	19	44	48	25.17	20.57					1.81667	25.17	20.57
7	31	2015	19	50	48	25.17	20.57					1.82083	25.17	20.57
7	31	2015	19	56	48	25.17	20.19					1.825	25.17	20.19
7	31	2015	20	2	48	24.79	20.19					1.82917	24.79	20.19
7	31	2015	20	8	48	24.79	20.19					1.83333	24.79	20.19
7	31	2015	20	14	48	24.79	20.19					1.8375	24.79	20.19
7	31	2015	20	20	48	24.4	19.81					1.84167	24.4	19.81
7	31	2015	20	26	48	24.4	19.42					1.84583	24.4	19.42
7	31	2015	20	32	48	24.4	19.42					1.85	24.4	19.42
7	31	2015	20	38	48	24.01	19.04					1.85417	24.01	19.04
7	31	2015	20	44	48	24.01	19.04					1.85833	24.01	19.04
7	31	2015	20	50	48	23.63	19.04					1.8625	23.63	19.04
7	31	2015	20	56	48	23.63	18.66					1.86667	23.63	18.66
7	31	2015	21	2	48	23.63	18.66					1.87083	23.63	18.66
7	31	2015	21	8	48	23.24	18.66					1.875	23.24	18.66
7	31	2015	21	14	48	23.24	18.28					1.87917	23.24	18.28
7	31	2015	21	20	48	23.24	18.28					1.88333	23.24	18.28
7	31	2015	21	26	48	22.86	18.28					1.8875	22.86	18.28
7	31	2015	21	32	48	22.86	18.28					1.89167	22.86	18.28
7	31	2015	21	38	48	22.86	17.9					1.89583	22.86	17.9
7	31	2015	21	44	48	22.48	17.9					1.9	22.48	17.9
7	31	2015	21	50	48	22.48	17.9					1.90417	22.48	17.9
7	31	2015	21	56	48	22.48	17.9					1.90833	22.48	17.9
7	31	2015	22	2	48	22.09	17.9					1.9125	22.09	17.9
7	31	2015	22	8	48	22.09	17.9					1.91667	22.09	17.9
7	31	2015	22	14	48	22.09	17.52					1.92083	22.09	17.52
7	31	2015	22	20	48	21.71	17.52					1.925	21.71	17.52
7	31	2015	22	26	48	21.71	17.14					1.92917	21.71	17.14
7	31	2015	22	32	48	21.71	17.14					1.93333	21.71	17.14
7	31	2015	22	38	48	21.71	16.76					1.9375	21.71	16.76
7	31	2015	22	44	48	21.33	16.76					1.94167	21.33	16.76
7	31	2015	22	50	48	21.33	16.76					1.94583	21.33	16.76
7	31	2015	22	56	48	21.33	16.38					1.95	21.33	16.38
7	31	2015	23	2	48	20.95	16.38					1.95417	20.95	16.38
7	31	2015	23	8	48	20.95	16.38					1.95833	20.95	16.38
7	31	2015	23	14	48	20.95	16.38					1.9625	20.95	16.38
7	31	2015	23	20	48	20.57	16					1.96667	20.57	16
7	31	2015	23	26	48	20.57	16					1.97083	20.57	16
7	31	2015	23	32	48	20.57	16.38					1.975	20.57	16.38
7	31	2015	23	38	48	20.57	16					1.97917	20.57	16
7	31	2015	23	44	48	20.19	16.38					1.98333	20.19	16.38
7	31	2015	23	50	48	20.19	16					1.9875	20.19	16
7	31	2015	23	56	48	20.19	16					1.99167	20.19	16
8	1	2015	0	2	48	20.19	15.62					1.99583	20.19	15.62
8	1	2015	0	8	48	19.81	16					2	19.81	16
8	1	2015	0	14	48	19.81	16					2.00417	19.81	16
8	1	2015	0	20	48	19.81	16					2.00833	19.81	16
8	1	2015	0	26	48	19.42	15.62					2.0125	19.42	15.62
8	1	2015	0	32	48	19.42	14.85					2.01667	19.42	14.85
8	1	2015	0	38	48	19.42	14.85					2.02083	19.42	14.85
8	1	2015	0	44	48	19.42	15.23					2.025	19.42	15.23
8	1	2015	0	50	48	19.42	15.62					2.02917	19.42	15.62
8	1	2015	0	56	48	19.04	15.62					2.03333	19.04	15.62
8	1	2015	1	2	48	19.04	15.23					2.0375	19.04	15.23
8	1	2015	1	8	48	19.04	15.23					2.04167	19.04	15.23
8	1	2015	1	14	48	19.04	14.47					2.04583	19.04	14.47
8	1	2015	1	20	48	19.04	14.47					2.05	19.04	14.47
8	1	2015	1	26	48	18.66	14.47					2.05417	18.66	14.47
8	1	2015	1	32	48	18.66	14.47					2.05833	18.66	14.47
8	1	2015	1	38	48	18.66	14.47					2.0625	18.66	14.47
8	1	2015	1	44	48	18.66	14.47					2.06667	18.66	14.47
8	1	2015	1	50	48	18.28	14.09					2.07083	18.28	14.09
8	1	2015	1	56	48	18.28	14.09					2.075	18.28	14.09
8	1	2015	2	2	48	18.28	14.09					2.07917	18.28	14.09
8	1	2015	2	8	48	18.28	14.85					2.08333	18.28	14.85
8	1	2015	2	14	48	18.28	15.23					2.0875	18.28	15.23
8	1	2015	2	20	48	17.9	14.85					2.09167	17.9	14.85
8	1	2015	2	26	48	17.9	15.23					2.09583	17.9	15.23
8	1	2015	2	32	48	17.9	15.23					2.1	17.9	15.23
8	1	2015	2	38	48	17.9	15.23					2.10417	17.9	15.23
8	1	2015	2	44	48	17.9	15.23					2.10833	17.9	15.23
8	1	2015	2	50	48	17.52	15.23					2.1125	17.52	15.23
8	1	2015	2	56	48	17.52	15.23					2.11667	17.52	15.23
8	1	2015	3	2	48	17.52	15.23					2.12083	17.52	15.23
8	1	2015	3	8	48	17.52	15.23					2.125	17.52	15.23
8	1	2015	3	14	48	17.52	15.23					2.12917	17.52	15.23
8	1	2015	3	20	48	17.52	15.23					2.13333	17.52	15.23
8	1	2015	3	26	48	17.14	15.23					2.1375	17.14	15.23
8	1	2015	3	32	48	17.14	15.23					2.14167	17.14	15.23
8	1	2015	3	38	48	17.14	15.23					2.14583	17.14	15.23
8	1	2015	3	44	48	17.14	15.23					2.15	17.14	15.23
8	1	2015	3	50	48	17.14	14.85					2.15417	17.14	14.85
8	1	2015	3	56	48	17.14	14.85					2.15833	17.14	14.85
8	1	2015	4	2	48	17.14	14.85					2.1625	17.14	14.85
8	1	2015	4	8	48	16.76	14.47					2.16667	16.76	14.47
8	1	2015	4	14	48	16.76	14.85					2.17083	16.76	14.85
8	1	2015	4	20	48	16.76	14.47					2.175	16.76	14.47
8	1	2015	4	26	48	16.76	14.47					2.17917	16.76	14.47
8	1	2015	4	32	48	16.76	14.09					2.18333	16.76	14.09
8	1	2015	4	38	48	16.76	14.47					2.1875	16.76	14.47
8	1	2015	4	44	48	16.76	14.09					2.19167	16.76	14.09
8	1	2015	4	50	48	16.38	14.09					2.19583	16.38	14.09
8	1	2015	4	56	48	16.38	14.09					2.2	16.38	14.09
8	1	2015	5	2	48	16.38	14.09					2.20417	16.38	14.09
8	1	2015	5	8	48	16.38	14.09					2.20833	16.38	14.09
8	1	2015	5	14	48	16.38	14.09					2.2125	16.38	14.09
8	1	2015	5	20	48	16.38	14.09					2.21667	16.38	14.09
8	1	2015	5	26	48	16.38	14.09					2.22083	16.38	14.09
8	1	2015	5	32	48	16	13.7					2.225	16	13.7
8	1	2015	5	38	48	16	13.7					2.22917	16	13.7
8	1	2015	5	44	48	16	13.32					2.23333	16	13.32
8	1	2015	5	50	48	16	13.32					2.2375	16	13.32
8	1	2015	5	56	48	16	13.32					2.24167	16	13.32
8	1	2015	6	2	48	16	13.32					2.24583	16	13.32
8	1	2015	6	8	48	16	13.32					2.25	16	13.32
8	1	2015	6	14	48	15.62	13.32					2.25417	15.62	13.32
8	1	2015	6	20	48	15.62	12.93					2.25833	15.62	12.93
8	1	2015	6	26	48	15.62	13.32					2.2625	15.62	13.32
8	1	2015	6	32	48	15.62	13.32					2.26667	15.62	13.32
8	1	2015	6	38	48	15.62	14.09					2.27083	15.62	14.09
8	1	2015	6	44	48	15.62	14.09					2.275	15.62	14.09
8	1	2015	6	50	48	15.62	14.47					2.27917	15.62	14.47
8	1	2015	6	56	48	15.62	14.85					2.28333	15.62	14.85
8	1	2015	7	2	48	15.62	15.62					2.2875	15.62	15.62
8	1	2015	7	8	48	15.62	15.62					2.29167	15.62	15.62
8	1	2015	7	14	48	15.62	15.62					2.29583	15.62	15.62
8	1	2015	7	20	48	15.62	15.62					2.3	15.62	15.62
8	1	2015	7	26	48	15.62	15.62					2.30417	15.62	15.62
8	1	2015	7	32	48	15.62	15.23					2.30833	15.62	15.23
8	1	2015	7	38	48	15.62	15.62					2.3125	15.62	15.62
8	1	2015	7	44	48	15.62	15.62					2.31667	15.62	15.62
8	1	2015	7	50	48	15.62	15.62					2.32083	15.62	15.62
8	1	2015	7	56	48	15.62	16					2.325	15.62	16
8	1	2015	8	2	48	15.62	16.38					2.32917	15.62	16.38
8	1	2015	8	8	48	15.62	16.38					2.33333	15.62	16.38
8	1	2015	8	14	48	15.62	16.76					2.3375	15.62	16.76
8	1	2015	8	20	48	15.62	17.52					2.34167	15.62	17.52
8	1	2015	8	26	48	15.62	18.28					2.34583	15.62	18.28
8	1	2015	8	32	48	15.62	18.66					2.35	15.62	18.66
8	1	2015	8	38	48	15.62	18.66					2.35417	15.62	18.66
8	1	2015	8	44	48	16	18.66					2.35833	16	18.66
8	1	2015	8	50	48	16	18.28					2.3625	16	18.28
8	1	2015	8	56	48	16	18.66					2.36667	16	18.66
8	1	2015	9	2	48	16	19.42					2.37083	16	19.42
8	1	2015	9	8	48	16.38	19.42					2.375	16.38	19.42
8	1	2015	9	14	48	16.38	20.19					2.37917	16.38	20.19
8	1	2015	9	20	48	16.38	20.57					2.38333	16.38	20.57
8	1	2015	9	26	48	16.76	20.57					2.3875	16.76	20.57
8	1	2015	9	32	48	16.76	20.95					2.39167	16.76	20.95
8	1	2015	9	38	48	17.14	21.71					2.39583	17.14	21.71
8	1	2015	9	44	48	17.14	22.09					2.4	17.14	22.09
8	1	2015	9	50	48	17.14	22.86					2.40417	17.14	22.86
8	1	2015	9	56	48	17.52	23.63					2.40833	17.52	23.63
8	1	2015	10	2	48	17.52	24.01					2.4125	17.52	24.01
8	1	2015	10	8	48	17.9	24.79					2.41667	17.9	24.79
8	1	2015	10	14	48	17.9	25.56					2.42083	17.9	25.56
8	1	2015	10	20	48	18.28	27.12					2.425	18.28	27.12
8	1	2015	10	26	48	18.66	27.52					2.42917	18.66	27.52
8	1	2015	10	32	48	18.66	27.91					2.43333	18.66	27.91
8	1	2015	10	38	48	19.04	29.5					2.4375	19.04	29.5
8	1	2015	10	44	48	19.04	29.5					2.44167	19.04	29.5
8	1	2015	10	50	48	19.42	29.9					2.44583	19.42	29.9
8	1	2015	10	56	48	19.42	29.9					2.45	19.42	29.9
8	1	2015	11	2	48	19.81	33.17					2.45417	19.81	33.17
8	1	2015	11	8	48	19.81	39.22					2.45833	19.81	39.22
8	1	2015	11	14	48	20.19	40.59					2.4625	20.19	40.59
8	1	2015	11	20	48	20.19	41.52					2.46667	20.19	41.52
8	1	2015	11	26	48	20.19	35.7					2.47083	20.19	35.7
8	1	2015	11	32	48	20.57	30.71					2.475	20.57	30.71
8	1	2015	11	38	48	20.57	30.31					2.47917	20.57	30.31
8	1	2015	11	44	48	20.95	29.9					2.48333	20.95	29.9
8	1	2015	11	50	48	20.95	29.5					2.4875	20.95	29.5
8	1	2015	11	56	48	20.95	28.7					2.49167	20.95	28.7
8	1	2015	12	2	48	21.33	29.1					2.49583	21.33	29.1
8	1	2015	12	8	48	21.33	29.9					2.5	21.33	29.9
8	1	2015	12	14	48	21.71	30.71					2.50417	21.71	30.71
8	1	2015	12	20	48	21.71	29.5					2.50833	21.71	29.5
8	1	2015	12	26	48	22.09	29.5					2.5125	22.09	29.5
8	1	2015	12	32	48	22.09	29.5					2.51667	22.09	29.5
8	1	2015	12	38	48	22.48	28.7					2.52083	22.48	28.7
8	1	2015	12	44	48	22.48	28.7					2.525	22.48	28.7
8	1	2015	12	50	48	22.86	29.9					2.52917	22.86	29.9
8	1	2015	12	56	48	22.86	28.7					2.53333	22.86	28.7
8	1	2015	13	2	48	23.24	30.31					2.5375	23.24	30.31
8	1	2015	13	8	48	23.24	30.31					2.54167	23.24	30.31
8	1	2015	13	14	48	23.24	29.9					2.54583	23.24	29.9
8	1	2015	13	20	48	23.63	29.5					2.55	23.63	29.5
8	1	2015	13	26	48	23.63	29.5					2.55417	23.63	29.5
8	1	2015	13	32	48	24.01	29.1					2.55833	24.01	29.1
8	1	2015	13	38	48	24.01	28.7					2.5625	24.01	28.7
8	1	2015	13	44	48	24.4	29.5					2.56667	24.4	29.5
8	1	2015	13	50	48	24.4	29.5					2.57083	24.4	29.5
8	1	2015	13	56	48	24.79	29.5					2.575	24.79	29.5
8	1	2015	14	2	48	24.79	29.9					2.57917	24.79	29.9
8	1	2015	14	8	48	24.79	29.5					2.58333	24.79	29.5
8	1	2015	14	14	48	25.17	30.31					2.5875	25.17	30.31
8	1	2015	14	20	48	25.17	29.9					2.59167	25.17	29.9
8	1	2015	14	26	48	25.56	29.5					2.59583	25.56	29.5
8	1	2015	14	32	48	25.56	29.9					2.6	25.56	29.9
8	1	2015	14	38	48	25.95	29.1					2.60417	25.95	29.1
8	1	2015	14	44	48	25.95	28.31					2.60833	25.95	28.31
8	1	2015	14	50	48	26.34	28.7					2.6125	26.34	28.7
8	1	2015	14	56	48	26.34	28.7					2.61667	26.34	28.7
8	1	2015	15	2	48	26.34	28.31					2.62083	26.34	28.31
8	1	2015	15	8	48	26.34	29.1					2.625	26.34	29.1
8	1	2015	15	14	48	26.73	28.7					2.62917	26.73	28.7
8	1	2015	15	20	48	26.73	28.31					2.63333	26.73	28.31
8	1	2015	15	26	48	26.73	28.31					2.6375	26.73	28.31
8	1	2015	15	32	48	26.73	28.31					2.64167	26.73	28.31
8	1	2015	15	38	48	26.73	28.31					2.64583	26.73	28.31
8	1	2015	15	44	48	27.12	28.31					2.65	27.12	28.31
8	1	2015	15	50	48	27.12	28.31					2.65417	27.12	28.31
8	1	2015	15	56	48	27.12	28.31					2.65833	27.12	28.31
8	1	2015	16	2	48	27.12	27.91					2.6625	27.12	27.91
8	1	2015	16	8	48	27.12	28.31					2.66667	27.12	28.31
8	1	2015	16	14	48	27.12	27.91					2.67083	27.12	27.91
8	1	2015	16	20	48	27.52	27.91					2.675	27.52	27.91
8	1	2015	16	26	48	27.52	27.91					2.67917	27.52	27.91
8	1	2015	16	32	48	27.52	27.52					2.68333	27.52	27.52
8	1	2015	16	38	48	27.52	27.91					2.6875	27.52	27.91
8	1	2015	16	44	48	27.52	27.52					2.69167	27.52	27.52
8	1	2015	16	50	48	27.91	27.52					2.69583	27.91	27.52
8	1	2015	16	56	48	27.91	27.52					2.7	27.91	27.52
8	1	2015	17	2	48	28.31	27.91					2.70417	28.31	27.91
8	1	2015	17	8	48	28.31	27.52					2.70833	28.31	27.52
8	1	2015	17	14	48	28.31	26.73					2.7125	28.31	26.73
8	1	2015	17	20	48	28.31	26.73					2.71667	28.31	26.73
8	1	2015	17	26	48	28.31	26.73					2.72083	28.31	26.73
8	1	2015	17	32	48	28.31	26.73					2.725	28.31	26.73
8	1	2015	17	38	48	28.31	26.73					2.72917	28.31	26.73
8	1	2015	17	44	48	28.31	26.73					2.73333	28.31	26.73
8	1	2015	17	50	48	28.31	26.73					2.7375	28.31	26.73
8	1	2015	17	56	48	27.91	26.34					2.74167	27.91	26.34
8	1	2015	18	2	48	27.91	26.34					2.74583	27.91	26.34
8	1	2015	18	8	48	27.91	26.34					2.75	27.91	26.34
8	1	2015	18	14	48	27.91	25.95					2.75417	27.91	25.95
8	1	2015	18	20	48	27.91	25.95					2.75833	27.91	25.95
8	1	2015	18	26	48	27.52	25.56					2.7625	27.52	25.56
8	1	2015	18	32	48	27.52	25.17					2.76667	27.52	25.17
8	1	2015	18	38	48	27.52	24.79					2.77083	27.52	24.79
8	1	2015	18	44	48	27.52	24.79					2.775	27.52	24.79
8	1	2015	18	50	48	27.12	24.79					2.77917	27.12	24.79
8	1	2015	18	56	48	27.12	24.4					2.78333	27.12	24.4
8	1	2015	19	2	48	27.12	24.4					2.7875	27.12	24.4
8	1	2015	19	8	48	27.12	24.01					2.79167	27.12	24.01
8	1	2015	19	14	48	26.73	24.01					2.79583	26.73	24.01
8	1	2015	19	20	48	26.73	24.01					2.8	26.73	24.01
8	1	2015	19	26	48	26.73	23.63					2.80417	26.73	23.63
8	1	2015	19	32	48	26.34	23.63					2.80833	26.34	23.63
8	1	2015	19	38	48	26.34	23.63					2.8125	26.34	23.63
8	1	2015	19	44	48	26.34	23.63					2.81667	26.34	23.63
8	1	2015	19	50	48	26.34	23.63					2.82083	26.34	23.63
8	1	2015	19	56	48	25.95	23.63					2.825	25.95	23.63
8	1	2015	20	2	48	25.95	23.63					2.82917	25.95	23.63
8	1	2015	20	8	48	25.95	23.63					2.83333	25.95	23.63
8	1	2015	20	14	48	25.95	23.63					2.8375	25.95	23.63
8	1	2015	20	20	48	25.56	23.24					2.84167	25.56	23.24
8	1	2015	20	26	48	25.56	23.24					2.84583	25.56	23.24
8	1	2015	20	32	48	25.56	23.24					2.85	25.56	23.24
8	1	2015	20	38	48	25.56	22.86					2.85417	25.56	22.86
8	1	2015	20	44	48	25.17	22.86					2.85833	25.17	22.86
8	1	2015	20	50	48	25.17	22.86					2.8625	25.17	22.86
8	1	2015	20	56	48	25.17	22.86					2.86667	25.17	22.86
8	1	2015	21	2	48	25.17	22.86					2.87083	25.17	22.86
8	1	2015	21	8	48	25.17	22.86					2.875	25.17	22.86
8	1	2015	21	14	48	24.79	22.48					2.87917	24.79	22.48
8	1	2015	21	20	48	24.79	22.48					2.88333	24.79	22.48
8	1	2015	21	26	48	24.79	22.48					2.8875	24.79	22.48
8	1	2015	21	32	48	24.4	22.48					2.89167	24.4	22.48
8	1	2015	21	38	48	24.4	22.48					2.89583	24.4	22.48
8	1	2015	21	44	48	24.4	22.09					2.9	24.4	22.09
8	1	2015	21	50	48	24.4	22.09					2.90417	24.4	22.09
8	1	2015	21	56	48	24.4	22.09					2.90833	24.4	22.09
8	1	2015	22	2	48	24.01	21.71					2.9125	24.01	21.71
8	1	2015	22	8	48	24.01	21.71					2.91667	24.01	21.71
8	1	2015	22	14	48	24.01	21.71					2.92083	24.01	21.71
8	1	2015	22	20	48	24.01	21.71					2.925	24.01	21.71
8	1	2015	22	26	48	23.63	21.71					2.92917	23.63	21.71
8	1	2015	22	32	48	23.63	21.71					2.93333	23.63	21.71
8	1	2015	22	38	48	23.63	21.71					2.9375	23.63	21.71
8	1	2015	22	44	48	23.63	21.71					2.94167	23.63	21.71
8	1	2015	22	50	48	23.63	21.71					2.94583	23.63	21.71
8	1	2015	22	56	48	23.63	21.71					2.95	23.63	21.71
8	1	2015	23	2	48	23.24	21.33					2.95417	23.24	21.33
8	1	2015	23	8	48	23.24	21.33					2.95833	23.24	21.33
8	1	2015	23	14	48	23.24	21.33					2.9625	23.24	21.33
8	1	2015	23	20	48	23.24	21.33					2.96667	23.24	21.33
8	1	2015	23	26	48	23.24	21.33					2.97083	23.24	21.33
8	1	2015	23	32	48	23.24	21.71					2.975	23.24	21.71
8	1	2015	23	38	48	22.86	21.71					2.97917	22.86	21.71
8	1	2015	23	44	48	22.86	21.33					2.98333	22.86	21.33
8	1	2015	23	50	48	22.86	20.95					2.9875	22.86	20.95
8	1	2015	23	56	48	22.86	21.33					2.99167	22.86	21.33
8	2	2015	0	2	48	22.86	21.33					2.99583	22.86	21.33
8	2	2015	0	8	48	22.86	20.95					3	22.86	20.95
8	2	2015	0	14	48	22.86	20.95					3.00417	22.86	20.95
8	2	2015	0	20	48	22.48	20.57					3.00833	22.48	20.57
8	2	2015	0	26	48	22.48	20.95					3.0125	22.48	20.95
8	2	2015	0	32	48	22.48	20.57					3.01667	22.48	20.57
8	2	2015	0	38	48	22.48	20.57					3.02083	22.48	20.57
8	2	2015	0	44	48	22.48	20.57					3.025	22.48	20.57
8	2	2015	0	50	48	22.48	20.57					3.02917	22.48	20.57
8	2	2015	0	56	48	22.48	20.95					3.03333	22.48	20.95
8	2	2015	1	2	48	22.09	20.57					3.0375	22.09	20.57
8	2	2015	1	8	48	22.09	20.57					3.04167	22.09	20.57
8	2	2015	1	14	48	22.09	20.57					3.04583	22.09	20.57
8	2	2015	1	20	48	22.09	20.57					3.05	22.09	20.57
8	2	2015	1	26	48	22.09	20.57					3.05417	22.09	20.57
8	2	2015	1	32	48	22.09	20.95					3.05833	22.09	20.95
8	2	2015	1	38	48	22.09	21.33					3.0625	22.09	21.33
8	2	2015	1	44	48	22.09	20.95					3.06667	22.09	20.95
8	2	2015	1	50	48	21.71	20.95					3.07083	21.71	20.95
8	2	2015	1	56	48	21.71	20.95					3.075	21.71	20.95
8	2	2015	2	2	48	21.71	20.57					3.07917	21.71	20.57
8	2	2015	2	8	48	21.71	20.57					3.08333	21.71	20.57
8	2	2015	2	14	48	21.71	20.19					3.0875	21.71	20.19
8	2	2015	2	20	48	21.71	20.19					3.09167	21.71	20.19
8	2	2015	2	26	48	21.71	20.19					3.09583	21.71	20.19
8	2	2015	2	32	48	21.71	20.19					3.1	21.71	20.19
8	2	2015	2	38	48	21.71	20.19					3.10417	21.71	20.19
8	2	2015	2	44	48	21.71	20.19					3.10833	21.71	20.19
8	2	2015	2	50	48	21.33	20.19					3.1125	21.33	20.19
8	2	2015	2	56	48	21.33	19.81					3.11667	21.33	19.81
8	2	2015	3	2	48	21.33	19.81					3.12083	21.33	19.81
8	2	2015	3	8	48	21.33	19.81					3.125	21.33	19.81
8	2	2015	3	14	48	21.33	19.81					3.12917	21.33	19.81
8	2	2015	3	20	48	21.33	19.81					3.13333	21.33	19.81
8	2	2015	3	26	48	21.33	19.81					3.1375	21.33	19.81
8	2	2015	3	32	48	21.33	19.81					3.14167	21.33	19.81
8	2	2015	3	38	48	21.33	19.42					3.14583	21.33	19.42
8	2	2015	3	44	48	21.33	19.42					3.15	21.33	19.42
8	2	2015	3	50	48	20.95	19.42					3.15417	20.95	19.42
8	2	2015	3	56	48	20.95	19.42					3.15833	20.95	19.42
8	2	2015	4	2	48	20.95	19.04					3.1625	20.95	19.04
8	2	2015	4	8	48	20.95	19.04					3.16667	20.95	19.04
8	2	2015	4	14	48	20.95	19.04					3.17083	20.95	19.04
8	2	2015	4	20	48	20.95	19.04					3.175	20.95	19.04
8	2	2015	4	26	48	20.95	19.04					3.17917	20.95	19.04
8	2	2015	4	32	48	20.95	19.04					3.18333	20.95	19.04
8	2	2015	4	38	48	20.95	19.04					3.1875	20.95	19.04
8	2	2015	4	44	48	20.95	19.42					3.19167	20.95	19.42
8	2	2015	4	50	48	20.57	19.04					3.19583	20.57	19.04
8	2	2015	4	56	48	20.57	19.04					3.2	20.57	19.04
8	2	2015	5	2	48	20.57	19.04					3.20417	20.57	19.04
8	2	2015	5	8	48	20.57	19.04					3.20833	20.57	19.04
8	2	2015	5	14	48	20.57	19.04					3.2125	20.57	19.04
8	2	2015	5	20	48	20.57	19.04					3.21667	20.57	19.04
8	2	2015	5	26	48	20.57	18.66					3.22083	20.57	18.66
8	2	2015	5	32	48	20.57	18.66					3.225	20.57	18.66
8	2	2015	5	38	48	20.57	18.28					3.22917	20.57	18.28
8	2	2015	5	44	48	20.19	18.66					3.23333	20.19	18.66
8	2	2015	5	50	48	20.19	18.66					3.2375	20.19	18.66
8	2	2015	5	56	48	20.19	19.04					3.24167	20.19	19.04
8	2	2015	6	2	48	20.19	19.04					3.24583	20.19	19.04
8	2	2015	6	8	48	20.19	19.04					3.25	20.19	19.04
8	2	2015	6	14	48	20.19	19.04					3.25417	20.19	19.04
8	2	2015	6	20	48	20.19	19.04					3.25833	20.19	19.04
8	2	2015	6	26	48	20.19	19.42					3.2625	20.19	19.42
8	2	2015	6	32	48	20.19	19.42					3.26667	20.19	19.42
8	2	2015	6	38	48	20.19	19.42					3.27083	20.19	19.42
8	2	2015	6	44	48	20.19	19.42					3.275	20.19	19.42
8	2	2015	6	50	48	20.19	19.42					3.27917	20.19	19.42
8	2	2015	6	56	48	20.19	19.42					3.28333	20.19	19.42
8	2	2015	7	2	48	20.19	19.81					3.2875	20.19	19.81
8	2	2015	7	8	48	20.19	19.81					3.29167	20.19	19.81
8	2	2015	7	14	48	19.81	19.81					3.29583	19.81	19.81
8	2	2015	7	20	48	19.81	20.19					3.3	19.81	20.19
8	2	2015	7	26	48	19.81	20.19					3.30417	19.81	20.19
8	2	2015	7	32	48	19.81	20.19					3.30833	19.81	20.19
8	2	2015	7	38	48	19.81	20.19					3.3125	19.81	20.19
8	2	2015	7	44	48	19.81	20.19					3.31667	19.81	20.19
8	2	2015	7	50	48	19.81	20.19					3.32083	19.81	20.19
8	2	2015	7	56	48	19.81	20.19					3.325	19.81	20.19
8	2	2015	8	2	48	19.81	20.57					3.32917	19.81	20.57
8	2	2015	8	8	48	19.81	20.57					3.33333	19.81	20.57
8	2	2015	8	14	48	19.81	20.57					3.3375	19.81	20.57
8	2	2015	8	20	48	20.19	20.57					3.34167	20.19	20.57
8	2	2015	8	26	48	20.19	20.57					3.34583	20.19	20.57
8	2	2015	8	32	48	20.19	20.57					3.35	20.19	20.57
8	2	2015	8	38	48	20.19	20.95					3.35417	20.19	20.95
8	2	2015	8	44	48	20.19	20.95					3.35833	20.19	20.95
8	2	2015	8	50	48	20.19	20.95					3.3625	20.19	20.95
8	2	2015	8	56	48	20.19	21.33					3.36667	20.19	21.33
8	2	2015	9	2	48	20.19	21.33					3.37083	20.19	21.33
8	2	2015	9	8	48	20.19	21.71					3.375	20.19	21.71
8	2	2015	9	14	48	20.19	21.71					3.37917	20.19	21.71
8	2	2015	9	20	48	20.19	22.09					3.38333	20.19	22.09
8	2	2015	9	26	48	20.19	22.09					3.3875	20.19	22.09
8	2	2015	9	32	48	20.19	22.09					3.39167	20.19	22.09
8	2	2015	9	38	48	20.19	22.48					3.39583	20.19	22.48
8	2	2015	9	44	48	20.19	22.48					3.4	20.19	22.48
8	2	2015	9	50	48	20.19	22.48					3.40417	20.19	22.48
8	2	2015	9	56	48	20.57	22.48					3.40833	20.57	22.48
8	2	2015	10	2	48	20.57	22.86					3.4125	20.57	22.86
8	2	2015	10	8	48	20.57	22.86					3.41667	20.57	22.86
8	2	2015	10	14	48	20.57	22.86					3.42083	20.57	22.86
8	2	2015	10	20	48	20.57	23.24					3.425	20.57	23.24
8	2	2015	10	26	48	20.57	23.24					3.42917	20.57	23.24
8	2	2015	10	32	48	20.95	23.24					3.43333	20.95	23.24
8	2	2015	10	38	48	20.95	23.24					3.4375	20.95	23.24
8	2	2015	10	44	48	20.95	23.63					3.44167	20.95	23.63
8	2	2015	10	50	48	20.95	23.63					3.44583	20.95	23.63
8	2	2015	10	56	48	20.95	23.63					3.45	20.95	23.63
8	2	2015	11	2	48	20.95	23.63					3.45417	20.95	23.63
8	2	2015	11	8	48	21.33	24.01					3.45833	21.33	24.01
8	2	2015	11	14	48	21.33	25.17					3.4625	21.33	25.17
8	2	2015	11	20	48	21.33	26.73					3.46667	21.33	26.73
8	2	2015	11	26	48	21.33	25.95					3.47083	21.33	25.95
8	2	2015	11	32	48	21.33	28.31					3.475	21.33	28.31
8	2	2015	11	38	48	21.33	27.91					3.47917	21.33	27.91
8	2	2015	11	44	48	21.71	27.91					3.48333	21.71	27.91
8	2	2015	11	50	48	21.71	27.91					3.4875	21.71	27.91
8	2	2015	11	56	48	21.71	27.91					3.49167	21.71	27.91
8	2	2015	12	2	48	21.71	29.1					3.49583	21.71	29.1
8	2	2015	12	8	48	22.09	29.1					3.5	22.09	29.1
8	2	2015	12	14	48	22.09	27.91					3.50417	22.09	27.91
8	2	2015	12	20	48	22.48	27.12					3.50833	22.48	27.12
8	2	2015	12	26	48	22.48	26.73					3.5125	22.48	26.73
8	2	2015	12	32	48	22.86	26.34					3.51667	22.86	26.34
8	2	2015	12	38	48	22.86	26.34					3.52083	22.86	26.34
8	2	2015	12	44	48	22.86	25.95					3.525	22.86	25.95
8	2	2015	12	50	48	22.86	25.95					3.52917	22.86	25.95
8	2	2015	12	56	48	23.24	25.56					3.53333	23.24	25.56
8	2	2015	13	2	48	23.24	25.56					3.5375	23.24	25.56
8	2	2015	13	8	48	23.24	25.56					3.54167	23.24	25.56
8	2	2015	13	14	48	23.24	25.17					3.54583	23.24	25.17
8	2	2015	13	20	48	23.24	25.17					3.55	23.24	25.17
8	2	2015	13	26	48	23.63	25.17					3.55417	23.63	25.17
8	2	2015	13	32	48	23.63	25.56					3.55833	23.63	25.56
8	2	2015	13	38	48	23.63	25.56					3.5625	23.63	25.56
8	2	2015	13	44	48	23.63	25.95					3.56667	23.63	25.95
8	2	2015	13	50	48	23.63	25.95					3.57083	23.63	25.95
8	2	2015	13	56	48	23.63	26.34					3.575	23.63	26.34
8	2	2015	14	2	48	23.63	26.73					3.57917	23.63	26.73
8	2	2015	14	8	48	23.63	27.12					3.58333	23.63	27.12
8	2	2015	14	14	48	24.01	27.52					3.5875	24.01	27.52
8	2	2015	14	20	48	24.01	27.52					3.59167	24.01	27.52
8	2	2015	14	26	48	24.01	27.91					3.59583	24.01	27.91
8	2	2015	14	32	48	24.01	27.52					3.6	24.01	27.52
8	2	2015	14	38	48	24.4	27.12					3.60417	24.4	27.12
8	2	2015	14	44	48	24.4	27.12					3.60833	24.4	27.12
8	2	2015	14	50	48	24.4	26.73					3.6125	24.4	26.73
8	2	2015	14	56	48	24.79	27.12					3.61667	24.79	27.12
8	2	2015	15	2	48	24.79	27.12					3.62083	24.79	27.12
8	2	2015	15	8	48	24.79	26.73					3.625	24.79	26.73
8	2	2015	15	14	48	25.17	27.12					3.62917	25.17	27.12
8	2	2015	15	20	48	25.17	26.73					3.63333	25.17	26.73
8	2	2015	15	26	48	25.17	26.34					3.6375	25.17	26.34
8	2	2015	15	32	48	25.17	25.95					3.64167	25.17	25.95
8	2	2015	15	38	48	25.17	25.56					3.64583	25.17	25.56
8	2	2015	15	44	48	25.56	25.56					3.65	25.56	25.56
8	2	2015	15	50	48	25.56	24.79					3.65417	25.56	24.79
8	2	2015	15	56	48	25.56	25.17					3.65833	25.56	25.17
8	2	2015	16	2	48	25.56	25.17					3.6625	25.56	25.17
8	2	2015	16	8	48	25.56	24.79					3.66667	25.56	24.79
8	2	2015	16	14	48	25.56	24.4					3.67083	25.56	24.4
8	2	2015	16	20	48	25.56	23.63					3.675	25.56	23.63
8	2	2015	16	26	48	25.56	22.86					3.67917	25.56	22.86
8	2	2015	16	32	48	25.56	22.86					3.68333	25.56	22.86
8	2	2015	16	38	48	25.56	22.86					3.6875	25.56	22.86
8	2	2015	16	44	48	25.56	22.48					3.69167	25.56	22.48
8	2	2015	16	50	48	25.56	22.48					3.69583	25.56	22.48
8	2	2015	16	56	48	25.17	22.09					3.7	25.17	22.09
8	2	2015	17	2	48	25.17	21.33					3.70417	25.17	21.33
8	2	2015	17	8	48	25.17	20.57					3.70833	25.17	20.57
8	2	2015	17	14	48	25.17	20.19					3.7125	25.17	20.19
8	2	2015	17	20	48	25.17	19.81					3.71667	25.17	19.81
8	2	2015	17	26	48	25.17	19.81					3.72083	25.17	19.81
8	2	2015	17	32	48	24.79	19.42					3.725	24.79	19.42
8	2	2015	17	38	48	24.79	19.81					3.72917	24.79	19.81
8	2	2015	17	44	48	24.79	19.81					3.73333	24.79	19.81
8	2	2015	17	50	48	24.79	20.19					3.7375	24.79	20.19
8	2	2015	17	56	48	24.79	20.19					3.74167	24.79	20.19
8	2	2015	18	2	48	24.4	20.19					3.74583	24.4	20.19
8	2	2015	18	8	48	24.4	20.19					3.75	24.4	20.19
8	2	2015	18	14	48	24.4	20.57					3.75417	24.4	20.57
8	2	2015	18	20	48	24.4	20.95					3.75833	24.4	20.95
8	2	2015	18	26	48	24.4	21.33					3.7625	24.4	21.33
8	2	2015	18	32	48	24.01	21.71					3.76667	24.01	21.71
8	2	2015	18	38	48	24.01	21.71					3.77083	24.01	21.71
8	2	2015	18	44	48	24.01	22.09					3.775	24.01	22.09
8	2	2015	18	50	48	24.01	22.09					3.77917	24.01	22.09
8	2	2015	18	56	48	24.01	21.71					3.78333	24.01	21.71
8	2	2015	19	2	48	24.01	21.71					3.7875	24.01	21.71
8	2	2015	19	8	48	24.01	22.09					3.79167	24.01	22.09
8	2	2015	19	14	48	24.01	21.71					3.79583	24.01	21.71
8	2	2015	19	20	48	23.63	21.71					3.8	23.63	21.71
8	2	2015	19	26	48	23.63	21.71					3.80417	23.63	21.71
8	2	2015	19	32	48	23.63	21.71					3.80833	23.63	21.71
8	2	2015	19	38	48	23.63	21.71					3.8125	23.63	21.71
8	2	2015	19	44	48	23.63	21.71					3.81667	23.63	21.71
8	2	2015	19	50	48	23.63	21.71					3.82083	23.63	21.71
8	2	2015	19	56	48	23.63	21.71					3.825	23.63	21.71
8	2	2015	20	2	48	23.63	21.33					3.82917	23.63	21.33
8	2	2015	20	8	48	23.24	20.95					3.83333	23.24	20.95
8	2	2015	20	14	48	23.24	20.95					3.8375	23.24	20.95
8	2	2015	20	20	48	23.24	20.95					3.84167	23.24	20.95
8	2	2015	20	26	48	23.24	20.95					3.84583	23.24	20.95
8	2	2015	20	32	48	23.24	20.95					3.85	23.24	20.95
8	2	2015	20	38	48	23.24	20.95					3.85417	23.24	20.95
8	2	2015	20	44	48	23.24	20.95					3.85833	23.24	20.95
8	2	2015	20	50	48	22.86	20.95					3.8625	22.86	20.95
8	2	2015	20	56	48	22.86	20.57					3.86667	22.86	20.57
8	2	2015	21	2	48	22.86	20.57					3.87083	22.86	20.57
8	2	2015	21	8	48	22.86	20.57					3.875	22.86	20.57
8	2	2015	21	14	48	22.86	20.57					3.87917	22.86	20.57
8	2	2015	21	20	48	22.86	20.57					3.88333	22.86	20.57
8	2	2015	21	26	48	22.48	20.57					3.8875	22.48	20.57
8	2	2015	21	32	48	22.48	20.57					3.89167	22.48	20.57
8	2	2015	21	38	48	22.48	20.57					3.89583	22.48	20.57
8	2	2015	21	44	48	22.48	20.57					3.9	22.48	20.57
8	2	2015	21	50	48	22.48	20.57					3.90417	22.48	20.57
8	2	2015	21	56	48	22.48	20.57					3.90833	22.48	20.57
8	2	2015	22	2	48	22.48	20.57					3.9125	22.48	20.57
8	2	2015	22	8	48	22.09	20.57					3.91667	22.09	20.57
8	2	2015	22	14	48	22.09	20.19					3.92083	22.09	20.19
8	2	2015	22	20	48	22.09	20.19					3.925	22.09	20.19
8	2	2015	22	26	48	22.09	20.19					3.92917	22.09	20.19
8	2	2015	22	32	48	22.09	20.19					3.93333	22.09	20.19
8	2	2015	22	38	48	22.09	20.19					3.9375	22.09	20.19
8	2	2015	22	44	48	22.09	20.19					3.94167	22.09	20.19
8	2	2015	22	50	48	22.09	20.19					3.94583	22.09	20.19
8	2	2015	22	56	48	22.09	20.19					3.95	22.09	20.19
8	2	2015	23	2	48	21.71	20.19					3.95417	21.71	20.19
8	2	2015	23	8	48	21.71	20.19					3.95833	21.71	20.19
8	2	2015	23	14	48	21.71	20.19					3.9625	21.71	20.19
8	2	2015	23	20	48	21.71	20.19					3.96667	21.71	20.19
8	2	2015	23	26	48	21.71	20.19					3.97083	21.71	20.19
8	2	2015	23	32	48	21.71	20.19					3.975	21.71	20.19
8	2	2015	23	38	48	21.71	20.19					3.97917	21.71	20.19
8	2	2015	23	44	48	21.71	19.81					3.98333	21.71	19.81
8	2	2015	23	50	48	21.33	19.81					3.9875	21.33	19.81
8	2	2015	23	56	48	21.33	19.81					3.99167	21.33	19.81
8	3	2015	0	2	48	21.33	19.81					3.99583	21.33	19.81
8	3	2015	0	8	48	21.33	19.81					4	21.33	19.81
8	3	2015	0	14	48	21.33	19.81					4.00417	21.33	19.81
8	3	2015	0	20	48	21.33	19.42					4.00833	21.33	19.42
8	3	2015	0	26	48	21.33	19.42					4.0125	21.33	19.42
8	3	2015	0	32	48	21.33	19.04					4.01667	21.33	19.04
8	3	2015	0	38	48	21.33	19.04					4.02083	21.33	19.04
8	3	2015	0	44	48	20.95	19.04					4.025	20.95	19.04
8	3	2015	0	50	48	20.95	19.04					4.02917	20.95	19.04
8	3	2015	0	56	48	20.95	18.66					4.03333	20.95	18.66
8	3	2015	1	2	48	20.95	18.66					4.0375	20.95	18.66
8	3	2015	1	8	48	20.95	19.04					4.04167	20.95	19.04
8	3	2015	1	14	48	20.95	19.04					4.04583	20.95	19.04
8	3	2015	1	20	48	20.95	19.04					4.05	20.95	19.04
8	3	2015	1	26	48	20.95	19.04					4.05417	20.95	19.04
8	3	2015	1	32	48	20.95	19.42					4.05833	20.95	19.42
8	3	2015	1	38	48	20.57	19.42					4.0625	20.57	19.42
8	3	2015	1	44	48	20.57	19.04					4.06667	20.57	19.04
8	3	2015	1	50	48	20.57	19.04					4.07083	20.57	19.04
8	3	2015	1	56	48	20.57	18.66					4.075	20.57	18.66
8	3	2015	2	2	48	20.57	18.28					4.07917	20.57	18.28
8	3	2015	2	8	48	20.57	17.9					4.08333	20.57	17.9
8	3	2015	2	14	48	20.57	17.14					4.0875	20.57	17.14
8	3	2015	2	20	48	20.57	16.76					4.09167	20.57	16.76
8	3	2015	2	26	48	20.57	16.76					4.09583	20.57	16.76
8	3	2015	2	32	48	20.19	16.76					4.1	20.19	16.76
8	3	2015	2	38	48	20.19	16.76					4.10417	20.19	16.76
8	3	2015	2	44	48	20.19	16.76					4.10833	20.19	16.76
8	3	2015	2	50	48	20.19	17.14					4.1125	20.19	17.14
8	3	2015	2	56	48	20.19	17.52					4.11667	20.19	17.52
8	3	2015	3	2	48	20.19	17.52					4.12083	20.19	17.52
8	3	2015	3	8	48	20.19	17.14					4.125	20.19	17.14
8	3	2015	3	14	48	20.19	16.38					4.12917	20.19	16.38
8	3	2015	3	20	48	19.81	16.38					4.13333	19.81	16.38
8	3	2015	3	26	48	19.81	16					4.1375	19.81	16
8	3	2015	3	32	48	19.81	15.62					4.14167	19.81	15.62
8	3	2015	3	38	48	19.81	16					4.14583	19.81	16
8	3	2015	3	44	48	19.81	16					4.15	19.81	16
8	3	2015	3	50	48	19.42	16					4.15417	19.42	16
8	3	2015	3	56	48	19.42	16.38					4.15833	19.42	16.38
8	3	2015	4	2	48	19.42	16					4.1625	19.42	16
8	3	2015	4	8	48	19.42	16.38					4.16667	19.42	16.38
8	3	2015	4	14	48	19.42	16.38					4.17083	19.42	16.38
8	3	2015	4	20	48	19.42	16					4.175	19.42	16
8	3	2015	4	26	48	19.42	16.38					4.17917	19.42	16.38
8	3	2015	4	32	48	19.04	16.38					4.18333	19.04	16.38
8	3	2015	4	38	48	19.04	16.38					4.1875	19.04	16.38
8	3	2015	4	44	48	19.04	16					4.19167	19.04	16
8	3	2015	4	50	48	19.04	16					4.19583	19.04	16
8	3	2015	4	56	48	19.04	16					4.2	19.04	16
8	3	2015	5	2	48	19.04	16					4.20417	19.04	16
8	3	2015	5	8	48	19.04	15.62					4.20833	19.04	15.62
8	3	2015	5	14	48	18.66	15.62					4.2125	18.66	15.62
8	3	2015	5	20	48	18.66	15.62					4.21667	18.66	15.62
8	3	2015	5	26	48	18.66	15.62					4.22083	18.66	15.62
8	3	2015	5	32	48	18.66	15.62					4.225	18.66	15.62
8	3	2015	5	38	48	18.66	15.62					4.22917	18.66	15.62
8	3	2015	5	44	48	18.66	16					4.23333	18.66	16
8	3	2015	5	50	48	18.66	16					4.2375	18.66	16
8	3	2015	5	56	48	18.66	16					4.24167	18.66	16
8	3	2015	6	2	48	18.28	16					4.24583	18.28	16
8	3	2015	6	8	48	18.28	16					4.25	18.28	16
8	3	2015	6	14	48	18.28	16					4.25417	18.28	16
8	3	2015	6	20	48	18.28	16					4.25833	18.28	16
8	3	2015	6	26	48	18.28	16					4.2625	18.28	16
8	3	2015	6	32	48	18.28	16.38					4.26667	18.28	16.38
8	3	2015	6	38	48	18.28	16.38					4.27083	18.28	16.38
8	3	2015	6	44	48	18.28	16.76					4.275	18.28	16.76
8	3	2015	6	50	48	17.9	17.14					4.27917	17.9	17.14
8	3	2015	6	56	48	17.9	17.14					4.28333	17.9	17.14
8	3	2015	7	2	48	17.9	17.14					4.2875	17.9	17.14
8	3	2015	7	8	48	17.9	17.52					4.29167	17.9	17.52
8	3	2015	7	14	48	17.9	17.52					4.29583	17.9	17.52
8	3	2015	7	20	48	17.9	17.52					4.3	17.9	17.52
8	3	2015	7	26	48	17.9	17.9					4.30417	17.9	17.9
8	3	2015	7	32	48	17.9	18.28					4.30833	17.9	18.28
8	3	2015	7	38	48	17.9	18.28					4.3125	17.9	18.28
8	3	2015	7	44	48	18.28	18.66					4.31667	18.28	18.66
8	3	2015	7	50	48	18.28	18.66					4.32083	18.28	18.66
8	3	2015	7	56	48	18.28	19.04					4.325	18.28	19.04
8	3	2015	8	2	48	18.28	19.04					4.32917	18.28	19.04
8	3	2015	8	8	48	18.28	19.42					4.33333	18.28	19.42
8	3	2015	8	14	48	18.28	19.81					4.3375	18.28	19.81
8	3	2015	8	20	48	18.28	20.19					4.34167	18.28	20.19
8	3	2015	8	26	48	18.66	20.19					4.34583	18.66	20.19
8	3	2015	8	32	48	18.66	20.95					4.35	18.66	20.95
8	3	2015	8	38	48	18.66	21.33					4.35417	18.66	21.33
8	3	2015	8	44	48	18.66	21.33					4.35833	18.66	21.33
8	3	2015	8	50	48	19.04	21.33					4.3625	19.04	21.33
8	3	2015	8	56	48	19.04	21.71					4.36667	19.04	21.71
8	3	2015	9	2	48	19.04	22.09					4.37083	19.04	22.09
8	3	2015	9	8	48	19.04	22.48					4.375	19.04	22.48
8	3	2015	9	14	48	19.42	22.86					4.37917	19.42	22.86
8	3	2015	9	20	48	19.42	22.86					4.38333	19.42	22.86
8	3	2015	9	26	48	19.42	22.86					4.3875	19.42	22.86
8	3	2015	9	32	48	19.81	24.01					4.39167	19.81	24.01
8	3	2015	9	38	48	19.81	24.4					4.39583	19.81	24.4
8	3	2015	9	44	48	20.19	25.17					4.4	20.19	25.17
8	3	2015	9	50	48	20.19	25.95					4.40417	20.19	25.95
8	3	2015	9	56	48	20.57	25.95					4.40833	20.57	25.95
8	3	2015	10	2	48	20.57	26.34					4.4125	20.57	26.34
8	3	2015	10	8	48	20.95	27.12					4.41667	20.95	27.12
8	3	2015	10	14	48	20.95	27.52					4.42083	20.95	27.52
8	3	2015	10	20	48	21.33	27.52					4.425	21.33	27.52
8	3	2015	10	26	48	21.33	29.5					4.42917	21.33	29.5
8	3	2015	10	32	48	21.71	29.1					4.43333	21.71	29.1
8	3	2015	10	38	48	21.71	29.9					4.4375	21.71	29.9
8	3	2015	10	44	48	22.09	30.31					4.44167	22.09	30.31
8	3	2015	10	50	48	22.09	30.71					4.44583	22.09	30.71
8	3	2015	10	56	48	22.48	35.27					4.45	22.48	35.27
8	3	2015	11	2	48	22.48	41.99					4.45417	22.48	41.99
8	3	2015	11	8	48	22.86	36.57					4.45833	22.86	36.57
8	3	2015	11	14	48	22.86	31.93					4.4625	22.86	31.93
8	3	2015	11	20	48	23.24	29.9					4.46667	23.24	29.9
8	3	2015	11	26	48	23.24	28.7					4.47083	23.24	28.7
8	3	2015	11	32	48	23.24	27.91					4.475	23.24	27.91
8	3	2015	11	38	48	23.63	29.9					4.47917	23.63	29.9
8	3	2015	11	44	48	23.63	31.12					4.48333	23.63	31.12
8	3	2015	11	50	48	23.63	31.12					4.4875	23.63	31.12
8	3	2015	11	56	48	24.01	30.71					4.49167	24.01	30.71
8	3	2015	12	2	48	24.01	30.31					4.49583	24.01	30.31
8	3	2015	12	8	48	24.4	30.71					4.5	24.4	30.71
8	3	2015	12	14	48	24.4	30.71					4.50417	24.4	30.71
8	3	2015	12	20	48	24.4	30.31					4.50833	24.4	30.31
8	3	2015	12	26	48	24.79	31.52					4.5125	24.79	31.52
8	3	2015	12	32	48	25.17	31.52					4.51667	25.17	31.52
8	3	2015	12	38	48	25.17	32.34					4.52083	25.17	32.34
8	3	2015	12	44	48	25.56	31.93					4.525	25.56	31.93
8	3	2015	12	50	48	25.56	31.12					4.52917	25.56	31.12
8	3	2015	12	56	48	25.95	30.31					4.53333	25.95	30.31
8	3	2015	13	2	48	25.95	30.31					4.5375	25.95	30.31
8	3	2015	13	8	48	26.34	30.71					4.54167	26.34	30.71
8	3	2015	13	14	48	26.34	31.52					4.54583	26.34	31.52
8	3	2015	13	20	48	26.73	31.93					4.55	26.73	31.93
8	3	2015	13	26	48	26.73	30.71					4.55417	26.73	30.71
8	3	2015	13	32	48	26.73	30.71					4.55833	26.73	30.71
8	3	2015	13	38	48	27.12	29.9					4.5625	27.12	29.9
8	3	2015	13	44	48	27.12	29.9					4.56667	27.12	29.9
8	3	2015	13	50	48	27.52	29.9					4.57083	27.52	29.9
8	3	2015	13	56	48	27.52	29.1					4.575	27.52	29.1
8	3	2015	14	2	48	27.52	28.7					4.57917	27.52	28.7
8	3	2015	14	8	48	27.91	28.7					4.58333	27.91	28.7
8	3	2015	14	14	48	27.91	28.7					4.5875	27.91	28.7
8	3	2015	14	20	48	27.91	29.1					4.59167	27.91	29.1
8	3	2015	14	26	48	27.91	29.1					4.59583	27.91	29.1
8	3	2015	14	32	48	27.91	29.1					4.6	27.91	29.1
8	3	2015	14	38	48	27.91	29.1					4.60417	27.91	29.1
8	3	2015	14	44	48	27.91	28.7					4.60833	27.91	28.7
8	3	2015	14	50	48	27.91	29.5					4.6125	27.91	29.5
8	3	2015	14	56	48	27.91	29.9					4.61667	27.91	29.9
8	3	2015	15	2	48	27.91	29.9					4.62083	27.91	29.9
8	3	2015	15	8	48	28.31	29.9					4.625	28.31	29.9
8	3	2015	15	14	48	28.31	29.5					4.62917	28.31	29.5
8	3	2015	15	20	48	28.31	29.5					4.63333	28.31	29.5
8	3	2015	15	26	48	28.31	29.5					4.6375	28.31	29.5
8	3	2015	15	32	48	28.7	29.5					4.64167	28.7	29.5
8	3	2015	15	38	48	28.7	28.7					4.64583	28.7	28.7
8	3	2015	15	44	48	28.7	29.1					4.65	28.7	29.1
8	3	2015	15	50	48	28.7	29.5					4.65417	28.7	29.5
8	3	2015	15	56	48	29.1	29.5					4.65833	29.1	29.5
8	3	2015	16	2	48	29.1	29.1					4.6625	29.1	29.1
8	3	2015	16	8	48	29.1	28.7					4.66667	29.1	28.7
8	3	2015	16	14	48	29.1	29.1					4.67083	29.1	29.1
8	3	2015	16	20	48	29.1	28.31					4.675	29.1	28.31
8	3	2015	16	26	48	29.1	28.31					4.67917	29.1	28.31
8	3	2015	16	32	48	29.1	28.31					4.68333	29.1	28.31
8	3	2015	16	38	48	29.1	27.91					4.6875	29.1	27.91
8	3	2015	16	44	48	29.1	28.31					4.69167	29.1	28.31
8	3	2015	16	50	48	29.5	28.7					4.69583	29.5	28.7
8	3	2015	16	56	48	29.5	28.31					4.7	29.5	28.31
8	3	2015	17	2	48	29.5	28.31					4.70417	29.5	28.31
8	3	2015	17	8	48	29.5	27.91					4.70833	29.5	27.91
8	3	2015	17	14	48	29.5	27.52					4.7125	29.5	27.52
8	3	2015	17	20	48	29.5	27.52					4.71667	29.5	27.52
8	3	2015	17	26	48	29.5	27.52					4.72083	29.5	27.52
8	3	2015	17	32	48	29.5	27.52					4.725	29.5	27.52
8	3	2015	17	38	48	29.5	27.52					4.72917	29.5	27.52
8	3	2015	17	44	48	29.1	27.91					4.73333	29.1	27.91
8	3	2015	17	50	48	29.1	27.52					4.7375	29.1	27.52
8	3	2015	17	56	48	29.1	27.12					4.74167	29.1	27.12
8	3	2015	18	2	48	29.1	27.12					4.74583	29.1	27.12
8	3	2015	18	8	48	29.1	26.73					4.75	29.1	26.73
8	3	2015	18	14	48	29.1	27.12					4.75417	29.1	27.12
8	3	2015	18	20	48	28.7	26.73					4.75833	28.7	26.73
8	3	2015	18	26	48	28.7	27.12					4.7625	28.7	27.12
8	3	2015	18	32	48	28.7	27.52					4.76667	28.7	27.52
8	3	2015	18	38	48	28.7	27.12					4.77083	28.7	27.12
8	3	2015	18	44	48	28.7	27.12					4.775	28.7	27.12
8	3	2015	18	50	48	28.31	26.73					4.77917	28.31	26.73
8	3	2015	18	56	48	28.31	26.73					4.78333	28.31	26.73
8	3	2015	19	2	48	28.31	26.34					4.7875	28.31	26.34
8	3	2015	19	8	48	28.31	26.73					4.79167	28.31	26.73
8	3	2015	19	14	48	28.31	26.34					4.79583	28.31	26.34
8	3	2015	19	20	48	28.31	26.34					4.8	28.31	26.34
8	3	2015	19	26	48	28.31	26.34					4.80417	28.31	26.34
8	3	2015	19	32	48	27.91	26.34					4.80833	27.91	26.34
8	3	2015	19	38	48	27.91	25.95					4.8125	27.91	25.95
8	3	2015	19	44	48	27.91	25.95					4.81667	27.91	25.95
8	3	2015	19	50	48	27.91	25.95					4.82083	27.91	25.95
8	3	2015	19	56	48	27.91	25.56					4.825	27.91	25.56
8	3	2015	20	2	48	27.52	25.56					4.82917	27.52	25.56
8	3	2015	20	8	48	27.52	25.17					4.83333	27.52	25.17
8	3	2015	20	14	48	27.52	25.17					4.8375	27.52	25.17
8	3	2015	20	20	48	27.52	24.79					4.84167	27.52	24.79
8	3	2015	20	26	48	27.52	24.01					4.84583	27.52	24.01
8	3	2015	20	32	48	27.12	23.63					4.85	27.12	23.63
8	3	2015	20	38	48	27.12	23.63					4.85417	27.12	23.63
8	3	2015	20	44	48	27.12	23.24					4.85833	27.12	23.24
8	3	2015	20	50	48	27.12	23.24					4.8625	27.12	23.24
8	3	2015	20	56	48	26.73	23.24					4.86667	26.73	23.24
8	3	2015	21	2	48	26.73	22.86					4.87083	26.73	22.86
8	3	2015	21	8	48	26.73	22.48					4.875	26.73	22.48
8	3	2015	21	14	48	26.73	22.09					4.87917	26.73	22.09
8	3	2015	21	20	48	26.34	22.09					4.88333	26.34	22.09
8	3	2015	21	26	48	26.34	22.09					4.8875	26.34	22.09
8	3	2015	21	32	48	26.34	21.71					4.89167	26.34	21.71
8	3	2015	21	38	48	26.34	21.71					4.89583	26.34	21.71
8	3	2015	21	44	48	26.34	21.71					4.9	26.34	21.71
8	3	2015	21	50	48	25.95	21.71					4.90417	25.95	21.71
8	3	2015	21	56	48	25.95	21.33					4.90833	25.95	21.33
8	3	2015	22	2	48	25.95	21.33					4.9125	25.95	21.33
8	3	2015	22	8	48	25.56	21.71					4.91667	25.56	21.71
8	3	2015	22	14	48	25.56	21.33					4.92083	25.56	21.33
8	3	2015	22	20	48	25.56	21.33					4.925	25.56	21.33
8	3	2015	22	26	48	25.56	20.95					4.92917	25.56	20.95
8	3	2015	22	32	48	25.56	20.95					4.93333	25.56	20.95
8	3	2015	22	38	48	25.17	20.57					4.9375	25.17	20.57
8	3	2015	22	44	48	25.17	20.95					4.94167	25.17	20.95
8	3	2015	22	50	48	25.17	20.95					4.94583	25.17	20.95
8	3	2015	22	56	48	25.17	20.95					4.95	25.17	20.95
8	3	2015	23	2	48	25.17	21.33					4.95417	25.17	21.33
8	3	2015	23	8	48	24.79	21.33					4.95833	24.79	21.33
8	3	2015	23	14	48	24.79	21.33					4.9625	24.79	21.33
8	3	2015	23	20	48	24.79	21.33					4.96667	24.79	21.33
8	3	2015	23	26	48	24.79	21.33					4.97083	24.79	21.33
8	3	2015	23	32	48	24.4	20.95					4.975	24.4	20.95
8	3	2015	23	38	48	24.4	20.95					4.97917	24.4	20.95
8	3	2015	23	44	48	24.4	20.95					4.98333	24.4	20.95
8	3	2015	23	50	48	24.4	20.95					4.9875	24.4	20.95
8	3	2015	23	56	48	24.4	20.57					4.99167	24.4	20.57
8	4	2015	0	2	48	24.01	20.95					4.99583	24.01	20.95
8	4	2015	0	8	48	24.01	20.57					5	24.01	20.57
8	4	2015	0	14	48	24.01	20.95					5.00417	24.01	20.95
8	4	2015	0	20	48	24.01	20.57					5.00833	24.01	20.57
8	4	2015	0	26	48	24.01	20.57					5.0125	24.01	20.57
8	4	2015	0	32	48	23.63	20.57					5.01667	23.63	20.57
8	4	2015	0	38	48	23.63	19.81					5.02083	23.63	19.81
8	4	2015	0	44	48	23.63	19.42					5.025	23.63	19.42
8	4	2015	0	50	48	23.63	19.42					5.02917	23.63	19.42
8	4	2015	0	56	48	23.63	19.42					5.03333	23.63	19.42
8	4	2015	1	2	48	23.63	19.81					5.0375	23.63	19.81
8	4	2015	1	8	48	23.24	19.42					5.04167	23.24	19.42
8	4	2015	1	14	48	23.24	19.42					5.04583	23.24	19.42
8	4	2015	1	20	48	23.24	19.81					5.05	23.24	19.81
8	4	2015	1	26	48	23.24	20.19					5.05417	23.24	20.19
8	4	2015	1	32	48	23.24	20.57					5.05833	23.24	20.57
8	4	2015	1	38	48	23.24	20.19					5.0625	23.24	20.19
8	4	2015	1	44	48	22.86	19.81					5.06667	22.86	19.81
8	4	2015	1	50	48	22.86	19.04					5.07083	22.86	19.04
8	4	2015	1	56	48	22.86	19.42					5.075	22.86	19.42
8	4	2015	2	2	48	22.86	19.04					5.07917	22.86	19.04
8	4	2015	2	8	48	22.86	19.04					5.08333	22.86	19.04
8	4	2015	2	14	48	22.86	19.04					5.0875	22.86	19.04
8	4	2015	2	20	48	22.48	19.04					5.09167	22.48	19.04
8	4	2015	2	26	48	22.48	19.04					5.09583	22.48	19.04
8	4	2015	2	32	48	22.48	19.42					5.1	22.48	19.42
8	4	2015	2	38	48	22.48	19.81					5.10417	22.48	19.81
8	4	2015	2	44	48	22.48	19.42					5.10833	22.48	19.42
8	4	2015	2	50	48	22.48	19.42					5.1125	22.48	19.42
8	4	2015	2	56	48	22.09	19.04					5.11667	22.09	19.04
8	4	2015	3	2	48	22.09	19.04					5.12083	22.09	19.04
8	4	2015	3	8	48	22.09	18.66					5.125	22.09	18.66
8	4	2015	3	14	48	22.09	18.66					5.12917	22.09	18.66
8	4	2015	3	20	48	22.09	18.28					5.13333	22.09	18.28
8	4	2015	3	26	48	22.09	18.28					5.1375	22.09	18.28
8	4	2015	3	32	48	22.09	18.28					5.14167	22.09	18.28
8	4	2015	3	38	48	22.09	18.28					5.14583	22.09	18.28
8	4	2015	3	44	48	21.71	18.66					5.15	21.71	18.66
8	4	2015	3	50	48	21.71	18.66					5.15417	21.71	18.66
8	4	2015	3	56	48	21.71	18.66					5.15833	21.71	18.66
8	4	2015	4	2	48	21.71	19.04					5.1625	21.71	19.04
8	4	2015	4	8	48	21.71	19.04					5.16667	21.71	19.04
8	4	2015	4	14	48	21.71	18.66					5.17083	21.71	18.66
8	4	2015	4	20	48	21.71	17.9					5.175	21.71	17.9
8	4	2015	4	26	48	21.33	17.9					5.17917	21.33	17.9
8	4	2015	4	32	48	21.33	17.9					5.18333	21.33	17.9
8	4	2015	4	38	48	21.33	17.52					5.1875	21.33	17.52
8	4	2015	4	44	48	21.33	17.52					5.19167	21.33	17.52
8	4	2015	4	50	48	21.33	17.52					5.19583	21.33	17.52
8	4	2015	4	56	48	21.33	17.52					5.2	21.33	17.52
8	4	2015	5	2	48	20.95	17.14					5.20417	20.95	17.14
8	4	2015	5	8	48	20.95	17.14					5.20833	20.95	17.14
8	4	2015	5	14	48	20.95	17.14					5.2125	20.95	17.14
8	4	2015	5	20	48	20.95	17.14					5.21667	20.95	17.14
8	4	2015	5	26	48	20.95	17.14					5.22083	20.95	17.14
8	4	2015	5	32	48	20.95	17.14					5.225	20.95	17.14
8	4	2015	5	38	48	20.95	17.14					5.22917	20.95	17.14
8	4	2015	5	44	48	20.57	16.76					5.23333	20.57	16.76
8	4	2015	5	50	48	20.57	17.14					5.2375	20.57	17.14
8	4	2015	5	56	48	20.57	17.14					5.24167	20.57	17.14
8	4	2015	6	2	48	20.57	17.14					5.24583	20.57	17.14
8	4	2015	6	8	48	20.57	17.14					5.25	20.57	17.14
8	4	2015	6	14	48	20.57	17.52					5.25417	20.57	17.52
8	4	2015	6	20	48	20.57	17.52					5.25833	20.57	17.52
8	4	2015	6	26	48	20.57	17.9					5.2625	20.57	17.9
8	4	2015	6	32	48	20.19	17.9					5.26667	20.19	17.9
8	4	2015	6	38	48	20.19	18.28					5.27083	20.19	18.28
8	4	2015	6	44	48	20.19	18.66					5.275	20.19	18.66
8	4	2015	6	50	48	20.19	18.66					5.27917	20.19	18.66
8	4	2015	6	56	48	20.19	19.04					5.28333	20.19	19.04
8	4	2015	7	2	48	20.19	19.04					5.2875	20.19	19.04
8	4	2015	7	8	48	20.19	19.42					5.29167	20.19	19.42
8	4	2015	7	14	48	20.19	19.42					5.29583	20.19	19.42
8	4	2015	7	20	48	20.19	19.81					5.3	20.19	19.81
8	4	2015	7	26	48	20.19	20.19					5.30417	20.19	20.19
8	4	2015	7	32	48	20.19	20.19					5.30833	20.19	20.19
8	4	2015	7	38	48	20.19	20.57					5.3125	20.19	20.57
8	4	2015	7	44	48	20.19	20.57					5.31667	20.19	20.57
8	4	2015	7	50	48	20.19	20.95					5.32083	20.19	20.95
8	4	2015	7	56	48	20.19	20.95					5.325	20.19	20.95
8	4	2015	8	2	48	20.57	21.33					5.32917	20.57	21.33
8	4	2015	8	8	48	20.57	21.71					5.33333	20.57	21.71
8	4	2015	8	14	48	20.57	21.71					5.3375	20.57	21.71
8	4	2015	8	20	48	20.57	22.09					5.34167	20.57	22.09
8	4	2015	8	26	48	20.57	22.09					5.34583	20.57	22.09
8	4	2015	8	32	48	20.95	22.48					5.35	20.95	22.48
8	4	2015	8	38	48	20.95	22.48					5.35417	20.95	22.48
8	4	2015	8	44	48	20.95	23.24					5.35833	20.95	23.24
8	4	2015	8	50	48	20.95	23.63					5.3625	20.95	23.63
8	4	2015	8	56	48	21.33	23.63					5.36667	21.33	23.63
8	4	2015	9	2	48	21.33	24.01					5.37083	21.33	24.01
8	4	2015	9	8	48	21.33	24.79					5.375	21.33	24.79
8	4	2015	9	14	48	21.71	24.79					5.37917	21.71	24.79
8	4	2015	9	20	48	21.71	26.34					5.38333	21.71	26.34
8	4	2015	9	26	48	21.71	26.34					5.3875	21.71	26.34
8	4	2015	9	32	48	22.09	27.52					5.39167	22.09	27.52
8	4	2015	9	38	48	22.09	28.31					5.39583	22.09	28.31
8	4	2015	9	44	48	22.48	29.1					5.4	22.48	29.1
8	4	2015	9	50	48	22.48	29.1					5.40417	22.48	29.1
8	4	2015	9	56	48	22.86	29.5					5.40833	22.86	29.5
8	4	2015	10	2	48	22.86	30.71					5.4125	22.86	30.71
8	4	2015	10	8	48	23.24	30.71					5.41667	23.24	30.71
8	4	2015	10	14	48	23.24	31.52					5.42083	23.24	31.52
8	4	2015	10	20	48	23.63	31.52					5.425	23.63	31.52
8	4	2015	10	26	48	23.63	32.34					5.42917	23.63	32.34
8	4	2015	10	32	48	24.01	33.17					5.43333	24.01	33.17
8	4	2015	10	38	48	24.01	34.43					5.4375	24.01	34.43
8	4	2015	10	44	48	24.4	34.85					5.44167	24.4	34.85
8	4	2015	10	50	48	24.4	36.13					5.44583	24.4	36.13
8	4	2015	10	56	48	24.79	40.13					5.45	24.79	40.13
8	4	2015	11	2	48	24.79	44.89					5.45417	24.79	44.89
8	4	2015	11	8	48	25.17	47.43					5.45833	25.17	47.43
8	4	2015	11	14	48	25.17	47.43					5.4625	25.17	47.43
8	4	2015	11	20	48	25.17	48.49					5.46667	25.17	48.49
8	4	2015	11	26	48	25.56	47.96					5.47083	25.56	47.96
8	4	2015	11	32	48	25.56	43.42					5.475	25.56	43.42
8	4	2015	11	38	48	25.56	37					5.47917	25.56	37
8	4	2015	11	44	48	25.95	37					5.48333	25.95	37
8	4	2015	11	50	48	25.95	35.7					5.4875	25.95	35.7
8	4	2015	11	56	48	26.34	35.27					5.49167	26.34	35.27
8	4	2015	12	2	48	26.34	35.27					5.49583	26.34	35.27
8	4	2015	12	8	48	26.73	35.27					5.5	26.73	35.27
8	4	2015	12	14	48	26.73	35.27					5.50417	26.73	35.27
8	4	2015	12	20	48	27.12	35.7					5.50833	27.12	35.7
8	4	2015	12	26	48	27.12	35.7					5.5125	27.12	35.7
8	4	2015	12	32	48	27.52	35.7					5.51667	27.52	35.7
8	4	2015	12	38	48	27.52	35.27					5.52083	27.52	35.27
8	4	2015	12	44	48	27.91	35.27					5.525	27.91	35.27
8	4	2015	12	50	48	27.91	35.27					5.52917	27.91	35.27
8	4	2015	12	56	48	28.31	35.7					5.53333	28.31	35.7
8	4	2015	13	2	48	28.31	35.7					5.5375	28.31	35.7
8	4	2015	13	8	48	28.7	34.85					5.54167	28.7	34.85
8	4	2015	13	14	48	28.7	34.01					5.54583	28.7	34.01
8	4	2015	13	20	48	29.1	34.85					5.55	29.1	34.85
8	4	2015	13	26	48	29.1	34.01					5.55417	29.1	34.01
8	4	2015	13	32	48	29.1	34.43					5.55833	29.1	34.43
8	4	2015	13	38	48	29.5	34.43					5.5625	29.5	34.43
8	4	2015	13	44	48	29.5	34.43					5.56667	29.5	34.43
8	4	2015	13	50	48	29.5	34.85					5.57083	29.5	34.85
8	4	2015	13	56	48	29.5	35.27					5.575	29.5	35.27
8	4	2015	14	2	48	29.9	34.85					5.57917	29.9	34.85
8	4	2015	14	8	48	29.9	34.85					5.58333	29.9	34.85
8	4	2015	14	14	48	30.31	34.43					5.5875	30.31	34.43
8	4	2015	14	20	48	30.31	34.01					5.59167	30.31	34.01
8	4	2015	14	26	48	30.31	34.01					5.59583	30.31	34.01
8	4	2015	14	32	48	30.71	34.01					5.6	30.71	34.01
8	4	2015	14	38	48	30.71	33.59					5.60417	30.71	33.59
8	4	2015	14	44	48	30.71	32.76					5.60833	30.71	32.76
8	4	2015	14	50	48	30.71	32.76					5.6125	30.71	32.76
8	4	2015	14	56	48	31.12	33.59					5.61667	31.12	33.59
8	4	2015	15	2	48	31.12	34.43					5.62083	31.12	34.43
8	4	2015	15	8	48	31.12	34.43					5.625	31.12	34.43
8	4	2015	15	14	48	31.12	33.59					5.62917	31.12	33.59
8	4	2015	15	20	48	31.12	32.76					5.63333	31.12	32.76
8	4	2015	15	26	48	31.52	32.76					5.6375	31.52	32.76
8	4	2015	15	32	48	31.52	33.17					5.64167	31.52	33.17
8	4	2015	15	38	48	31.52	33.17					5.64583	31.52	33.17
8	4	2015	15	44	48	31.52	32.76					5.65	31.52	32.76
8	4	2015	15	50	48	31.52	32.76					5.65417	31.52	32.76
8	4	2015	15	56	48	31.93	32.76					5.65833	31.93	32.76
8	4	2015	16	2	48	31.93	32.34					5.6625	31.93	32.34
8	4	2015	16	8	48	31.93	31.52					5.66667	31.93	31.52
8	4	2015	16	14	48	31.93	31.12					5.67083	31.93	31.12
8	4	2015	16	20	48	31.93	31.52					5.675	31.93	31.52
8	4	2015	16	26	48	31.93	31.93					5.67917	31.93	31.93
8	4	2015	16	32	48	31.93	31.93					5.68333	31.93	31.93
8	4	2015	16	38	48	31.93	31.93					5.6875	31.93	31.93
8	4	2015	16	44	48	31.93	32.76					5.69167	31.93	32.76
8	4	2015	16	50	48	31.93	32.76					5.69583	31.93	32.76
8	4	2015	16	56	48	31.93	32.34					5.7	31.93	32.34
8	4	2015	17	2	48	31.93	31.52					5.70417	31.93	31.52
8	4	2015	17	8	48	31.93	30.71					5.70833	31.93	30.71
8	4	2015	17	14	48	31.93	30.31					5.7125	31.93	30.31
8	4	2015	17	20	48	31.93	30.71					5.71667	31.93	30.71
8	4	2015	17	26	48	31.93	31.12					5.72083	31.93	31.12
8	4	2015	17	32	48	31.93	30.31					5.725	31.93	30.31
8	4	2015	17	38	48	31.93	31.12					5.72917	31.93	31.12
8	4	2015	17	44	48	31.93	30.71					5.73333	31.93	30.71
8	4	2015	17	50	48	31.93	30.71					5.7375	31.93	30.71
8	4	2015	17	56	48	31.93	30.71					5.74167	31.93	30.71
8	4	2015	18	2	48	31.93	31.12					5.74583	31.93	31.12
8	4	2015	18	8	48	31.93	31.12					5.75	31.93	31.12
8	4	2015	18	14	48	31.93	31.12					5.75417	31.93	31.12
8	4	2015	18	20	48	31.52	31.12					5.75833	31.52	31.12
8	4	2015	18	26	48	31.52	30.31					5.7625	31.52	30.31
8	4	2015	18	32	48	31.52	30.31					5.76667	31.52	30.31
8	4	2015	18	38	48	31.52	30.31					5.77083	31.52	30.31
8	4	2015	18	44	48	31.52	29.9					5.775	31.52	29.9
8	4	2015	18	50	48	31.52	29.9					5.77917	31.52	29.9
8	4	2015	18	56	48	31.12	29.5					5.78333	31.12	29.5
8	4	2015	19	2	48	31.12	29.5					5.7875	31.12	29.5
8	4	2015	19	8	48	31.12	28.7					5.79167	31.12	28.7
8	4	2015	19	14	48	31.12	28.7					5.79583	31.12	28.7
8	4	2015	19	20	48	31.12	28.7					5.8	31.12	28.7
8	4	2015	19	26	48	31.12	28.7					5.80417	31.12	28.7
8	4	2015	19	32	48	30.71	28.31					5.80833	30.71	28.31
8	4	2015	19	38	48	30.71	27.91					5.8125	30.71	27.91
8	4	2015	19	44	48	30.71	27.91					5.81667	30.71	27.91
8	4	2015	19	50	48	30.71	27.52					5.82083	30.71	27.52
8	4	2015	19	56	48	30.31	27.12					5.825	30.31	27.12
8	4	2015	20	2	48	30.31	27.12					5.82917	30.31	27.12
8	4	2015	20	8	48	30.31	27.12					5.83333	30.31	27.12
8	4	2015	20	14	48	30.31	26.73					5.8375	30.31	26.73
8	4	2015	20	20	48	29.9	26.34					5.84167	29.9	26.34
8	4	2015	20	26	48	29.9	25.95					5.84583	29.9	25.95
8	4	2015	20	32	48	29.9	25.56					5.85	29.9	25.56
8	4	2015	20	38	48	29.9	25.56					5.85417	29.9	25.56
8	4	2015	20	44	48	29.5	25.17					5.85833	29.5	25.17
8	4	2015	20	50	48	29.5	25.17					5.8625	29.5	25.17
8	4	2015	20	56	48	29.5	25.17					5.86667	29.5	25.17
8	4	2015	21	2	48	29.5	24.79					5.87083	29.5	24.79
8	4	2015	21	8	48	29.1	24.79					5.875	29.1	24.79
8	4	2015	21	14	48	29.1	24.4					5.87917	29.1	24.4
8	4	2015	21	20	48	29.1	24.4					5.88333	29.1	24.4
8	4	2015	21	26	48	28.7	24.4					5.8875	28.7	24.4
8	4	2015	21	32	48	28.7	24.4					5.89167	28.7	24.4
8	4	2015	21	38	48	28.7	24.79					5.89583	28.7	24.79
8	4	2015	21	44	48	28.7	25.17					5.9	28.7	25.17
8	4	2015	21	50	48	28.31	24.79					5.90417	28.31	24.79
8	4	2015	21	56	48	28.31	24.79					5.90833	28.31	24.79
8	4	2015	22	2	48	28.31	24.4					5.9125	28.31	24.4
8	4	2015	22	8	48	28.31	24.79					5.91667	28.31	24.79
8	4	2015	22	14	48	27.91	24.79					5.92083	27.91	24.79
8	4	2015	22	20	48	27.91	24.4					5.925	27.91	24.4
8	4	2015	22	26	48	27.91	23.63					5.92917	27.91	23.63
8	4	2015	22	32	48	27.91	23.63					5.93333	27.91	23.63
8	4	2015	22	38	48	27.52	23.63					5.9375	27.52	23.63
8	4	2015	22	44	48	27.52	24.01					5.94167	27.52	24.01
8	4	2015	22	50	48	27.52	25.17					5.94583	27.52	25.17
8	4	2015	22	56	48	27.52	25.17					5.95	27.52	25.17
8	4	2015	23	2	48	27.12	24.79					5.95417	27.12	24.79
8	4	2015	23	8	48	27.12	24.79					5.95833	27.12	24.79
8	4	2015	23	14	48	27.12	24.4					5.9625	27.12	24.4
8	4	2015	23	20	48	27.12	24.79					5.96667	27.12	24.79
8	4	2015	23	26	48	27.12	24.79					5.97083	27.12	24.79
8	4	2015	23	32	48	26.73	24.4					5.975	26.73	24.4
8	4	2015	23	38	48	26.73	24.4					5.97917	26.73	24.4
8	4	2015	23	44	48	26.73	24.4					5.98333	26.73	24.4
8	4	2015	23	50	48	26.73	24.4					5.9875	26.73	24.4
8	4	2015	23	56	48	26.34	24.4					5.99167	26.34	24.4
8	5	2015	0	2	48	26.34	24.4					5.99583	26.34	24.4
8	5	2015	0	8	48	26.34	24.4					6	26.34	24.4
8	5	2015	0	14	48	26.34	24.01					6.00417	26.34	24.01
8	5	2015	0	20	48	26.34	24.01					6.00833	26.34	24.01
8	5	2015	0	26	48	26.34	24.01					6.0125	26.34	24.01
8	5	2015	0	32	48	25.95	23.63					6.01667	25.95	23.63
8	5	2015	0	38	48	25.95	23.63					6.02083	25.95	23.63
8	5	2015	0	44	48	25.95	23.63					6.025	25.95	23.63
8	5	2015	0	50	48	25.95	23.63					6.02917	25.95	23.63
8	5	2015	0	56	48	25.56	23.63					6.03333	25.56	23.63
8	5	2015	1	2	48	25.56	23.63					6.0375	25.56	23.63
8	5	2015	1	8	48	25.56	23.24					6.04167	25.56	23.24
8	5	2015	1	14	48	25.56	23.63					6.04583	25.56	23.63
8	5	2015	1	20	48	25.56	23.24					6.05	25.56	23.24
8	5	2015	1	26	48	25.56	23.24					6.05417	25.56	23.24
8	5	2015	1	32	48	25.17	23.24					6.05833	25.17	23.24
8	5	2015	1	38	48	25.17	23.24					6.0625	25.17	23.24
8	5	2015	1	44	48	25.17	23.24					6.06667	25.17	23.24
8	5	2015	1	50	48	25.17	23.24					6.07083	25.17	23.24
8	5	2015	1	56	48	25.17	23.24					6.075	25.17	23.24
8	5	2015	2	2	48	25.17	23.24					6.07917	25.17	23.24
8	5	2015	2	8	48	25.17	23.24					6.08333	25.17	23.24
8	5	2015	2	14	48	25.17	23.24					6.0875	25.17	23.24
8	5	2015	2	20	48	24.79	22.86					6.09167	24.79	22.86
8	5	2015	2	26	48	24.79	22.86					6.09583	24.79	22.86
8	5	2015	2	32	48	24.79	22.86					6.1	24.79	22.86
8	5	2015	2	38	48	24.79	22.86					6.10417	24.79	22.86
8	5	2015	2	44	48	24.79	22.48					6.10833	24.79	22.48
8	5	2015	2	50	48	24.79	22.48					6.1125	24.79	22.48
8	5	2015	2	56	48	24.79	22.48					6.11667	24.79	22.48
8	5	2015	3	2	48	24.4	22.48					6.12083	24.4	22.48
8	5	2015	3	8	48	24.4	22.48					6.125	24.4	22.48
8	5	2015	3	14	48	24.4	22.48					6.12917	24.4	22.48
8	5	2015	3	20	48	24.4	22.09					6.13333	24.4	22.09
8	5	2015	3	26	48	24.4	22.09					6.1375	24.4	22.09
8	5	2015	3	32	48	24.4	22.09					6.14167	24.4	22.09
8	5	2015	3	38	48	24.4	22.09					6.14583	24.4	22.09
8	5	2015	3	44	48	24.4	22.09					6.15	24.4	22.09
8	5	2015	3	50	48	24.01	22.09					6.15417	24.01	22.09
8	5	2015	3	56	48	24.01	21.71					6.15833	24.01	21.71
8	5	2015	4	2	48	24.01	21.71					6.1625	24.01	21.71
8	5	2015	4	8	48	24.01	21.71					6.16667	24.01	21.71
8	5	2015	4	14	48	24.01	21.71					6.17083	24.01	21.71
8	5	2015	4	20	48	24.01	21.33					6.175	24.01	21.33
8	5	2015	4	26	48	24.01	21.33					6.17917	24.01	21.33
8	5	2015	4	32	48	23.63	20.95					6.18333	23.63	20.95
8	5	2015	4	38	48	23.63	20.95					6.1875	23.63	20.95
8	5	2015	4	44	48	23.63	20.95					6.19167	23.63	20.95
8	5	2015	4	50	48	23.63	20.95					6.19583	23.63	20.95
8	5	2015	4	56	48	23.63	20.57					6.2	23.63	20.57
8	5	2015	5	2	48	23.63	20.57					6.20417	23.63	20.57
8	5	2015	5	8	48	23.63	20.19					6.20833	23.63	20.19
8	5	2015	5	14	48	23.24	20.19					6.2125	23.24	20.19
8	5	2015	5	20	48	23.24	20.19					6.21667	23.24	20.19
8	5	2015	5	26	48	23.24	20.19					6.22083	23.24	20.19
8	5	2015	5	32	48	23.24	19.81					6.225	23.24	19.81
8	5	2015	5	38	48	23.24	19.42					6.22917	23.24	19.42
8	5	2015	5	44	48	23.24	19.42					6.23333	23.24	19.42
8	5	2015	5	50	48	23.24	19.42					6.2375	23.24	19.42
8	5	2015	5	56	48	22.86	19.42					6.24167	22.86	19.42
8	5	2015	6	2	48	22.86	19.81					6.24583	22.86	19.81
8	5	2015	6	8	48	22.86	19.81					6.25	22.86	19.81
8	5	2015	6	14	48	22.86	19.81					6.25417	22.86	19.81
8	5	2015	6	20	48	22.86	19.81					6.25833	22.86	19.81
8	5	2015	6	26	48	22.86	19.81					6.2625	22.86	19.81
8	5	2015	6	32	48	22.86	20.19					6.26667	22.86	20.19
8	5	2015	6	38	48	22.48	20.19					6.27083	22.48	20.19
8	5	2015	6	44	48	22.48	20.19					6.275	22.48	20.19
8	5	2015	6	50	48	22.48	20.57					6.27917	22.48	20.57
8	5	2015	6	56	48	22.48	20.57					6.28333	22.48	20.57
8	5	2015	7	2	48	22.48	20.57					6.2875	22.48	20.57
8	5	2015	7	8	48	22.48	20.57					6.29167	22.48	20.57
8	5	2015	7	14	48	22.48	20.95					6.29583	22.48	20.95
8	5	2015	7	20	48	22.48	20.95					6.3	22.48	20.95
8	5	2015	7	26	48	22.48	20.95					6.30417	22.48	20.95
8	5	2015	7	32	48	22.48	21.33					6.30833	22.48	21.33
8	5	2015	7	38	48	22.48	21.33					6.3125	22.48	21.33
8	5	2015	7	44	48	22.48	21.71					6.31667	22.48	21.71
8	5	2015	7	50	48	22.48	21.71					6.32083	22.48	21.71
8	5	2015	7	56	48	22.48	22.09					6.325	22.48	22.09
8	5	2015	8	2	48	22.48	22.09					6.32917	22.48	22.09
8	5	2015	8	8	48	22.48	22.48					6.33333	22.48	22.48
8	5	2015	8	14	48	22.48	22.86					6.3375	22.48	22.86
8	5	2015	8	20	48	22.48	23.24					6.34167	22.48	23.24
8	5	2015	8	26	48	22.48	24.01					6.34583	22.48	24.01
8	5	2015	8	32	48	22.48	24.01					6.35	22.48	24.01
8	5	2015	8	38	48	22.86	23.63					6.35417	22.86	23.63
8	5	2015	8	44	48	22.86	23.63					6.35833	22.86	23.63
8	5	2015	8	50	48	22.86	23.63					6.3625	22.86	23.63
8	5	2015	8	56	48	22.86	24.4					6.36667	22.86	24.4
8	5	2015	9	2	48	22.86	24.4					6.37083	22.86	24.4
8	5	2015	9	8	48	23.24	25.17					6.375	23.24	25.17
8	5	2015	9	14	48	23.24	25.17					6.37917	23.24	25.17
8	5	2015	9	20	48	23.24	25.56					6.38333	23.24	25.56
8	5	2015	9	26	48	23.24	25.17					6.3875	23.24	25.17
8	5	2015	9	32	48	23.63	25.17					6.39167	23.63	25.17
8	5	2015	9	38	48	23.63	25.17					6.39583	23.63	25.17
8	5	2015	9	44	48	23.63	24.79					6.4	23.63	24.79
8	5	2015	9	50	48	23.63	25.56					6.40417	23.63	25.56
8	5	2015	9	56	48	24.01	27.12					6.40833	24.01	27.12
8	5	2015	10	2	48	24.01	26.73					6.4125	24.01	26.73
8	5	2015	10	8	48	24.01	27.91					6.41667	24.01	27.91
8	5	2015	10	14	48	24.4	28.7					6.42083	24.4	28.7
8	5	2015	10	20	48	24.4	29.5					6.425	24.4	29.5
8	5	2015	10	26	48	24.4	27.91					6.42917	24.4	27.91
8	5	2015	10	32	48	24.79	29.5					6.43333	24.79	29.5
8	5	2015	10	38	48	24.79	32.34					6.4375	24.79	32.34
8	5	2015	10	44	48	25.17	33.17					6.44167	25.17	33.17
8	5	2015	10	50	48	25.17	31.93					6.44583	25.17	31.93
8	5	2015	10	56	48	25.17	33.17					6.45	25.17	33.17
8	5	2015	11	2	48	25.56	40.13					6.45417	25.56	40.13
8	5	2015	11	8	48	25.56	43.91					6.45833	25.56	43.91
8	5	2015	11	14	48	25.56	42.94					6.4625	25.56	42.94
8	5	2015	11	20	48	25.95	38.77					6.46667	25.95	38.77
8	5	2015	11	26	48	25.95	45.39					6.47083	25.95	45.39
8	5	2015	11	32	48	26.34	39.67					6.475	26.34	39.67
8	5	2015	11	38	48	26.34	35.27					6.47917	26.34	35.27
8	5	2015	11	44	48	26.34	32.34					6.48333	26.34	32.34
8	5	2015	11	50	48	26.73	31.12					6.4875	26.73	31.12
8	5	2015	11	56	48	26.73	30.31					6.49167	26.73	30.31
8	5	2015	12	2	48	26.73	30.31					6.49583	26.73	30.31
8	5	2015	12	8	48	27.12	29.9					6.5	27.12	29.9
8	5	2015	12	14	48	27.12	31.52					6.50417	27.12	31.52
8	5	2015	12	20	48	27.12	31.12					6.50833	27.12	31.12
8	5	2015	12	26	48	27.52	32.76					6.5125	27.52	32.76
8	5	2015	12	32	48	27.52	32.34					6.51667	27.52	32.34
8	5	2015	12	38	48	27.52	32.76					6.52083	27.52	32.76
8	5	2015	12	44	48	27.91	31.12					6.525	27.91	31.12
8	5	2015	12	50	48	27.91	30.71					6.52917	27.91	30.71
8	5	2015	12	56	48	28.31	30.31					6.53333	28.31	30.31
8	5	2015	13	2	48	28.31	31.52					6.5375	28.31	31.52
8	5	2015	13	8	48	28.7	31.52					6.54167	28.7	31.52
8	5	2015	13	14	48	28.7	30.71					6.54583	28.7	30.71
8	5	2015	13	20	48	28.7	29.9					6.55	28.7	29.9
8	5	2015	13	26	48	29.1	29.5					6.55417	29.1	29.5
8	5	2015	13	32	48	29.1	29.5					6.55833	29.1	29.5
8	5	2015	13	38	48	29.1	29.5					6.5625	29.1	29.5
8	5	2015	13	44	48	29.1	29.5					6.56667	29.1	29.5
8	5	2015	13	50	48	29.1	30.71					6.57083	29.1	30.71
8	5	2015	13	56	48	29.5	30.31					6.575	29.5	30.31
8	5	2015	14	2	48	29.5	29.5					6.57917	29.5	29.5
8	5	2015	14	8	48	29.5	29.9					6.58333	29.5	29.9
8	5	2015	14	14	48	29.5	29.9					6.5875	29.5	29.9
8	5	2015	14	20	48	29.5	30.71					6.59167	29.5	30.71
8	5	2015	14	26	48	29.9	30.31					6.59583	29.9	30.31
8	5	2015	14	32	48	29.9	30.71					6.6	29.9	30.71
8	5	2015	14	38	48	29.9	30.71					6.60417	29.9	30.71
8	5	2015	14	44	48	30.31	30.71					6.60833	30.31	30.71
8	5	2015	14	50	48	30.31	30.31					6.6125	30.31	30.31
8	5	2015	14	56	48	30.31	30.71					6.61667	30.31	30.71
8	5	2015	15	2	48	30.71	30.31					6.62083	30.71	30.31
8	5	2015	15	8	48	30.71	30.71					6.625	30.71	30.71
8	5	2015	15	14	48	30.71	30.71					6.62917	30.71	30.71
8	5	2015	15	20	48	31.12	30.31					6.63333	31.12	30.31
8	5	2015	15	26	48	31.12	29.5					6.6375	31.12	29.5
8	5	2015	15	32	48	31.12	29.5					6.64167	31.12	29.5
8	5	2015	15	38	48	31.12	29.5					6.64583	31.12	29.5
8	5	2015	15	44	48	31.12	29.5					6.65	31.12	29.5
8	5	2015	15	50	48	31.12	29.5					6.65417	31.12	29.5
8	5	2015	15	56	48	31.12	29.5					6.65833	31.12	29.5
8	5	2015	16	2	48	31.12	29.9					6.6625	31.12	29.9
8	5	2015	16	8	48	31.12	29.5					6.66667	31.12	29.5
8	5	2015	16	14	48	31.12	29.1					6.67083	31.12	29.1
8	5	2015	16	20	48	31.12	29.1					6.675	31.12	29.1
8	5	2015	16	26	48	31.12	29.1					6.67917	31.12	29.1
8	5	2015	16	32	48	31.12	29.5					6.68333	31.12	29.5
8	5	2015	16	38	48	31.12	29.5					6.6875	31.12	29.5
8	5	2015	16	44	48	31.12	29.5					6.69167	31.12	29.5
8	5	2015	16	50	48	31.12	29.5					6.69583	31.12	29.5
8	5	2015	16	56	48	31.12	29.9					6.7	31.12	29.9
8	5	2015	17	2	48	31.12	29.5					6.70417	31.12	29.5
8	5	2015	17	8	48	31.12	29.5					6.70833	31.12	29.5
8	5	2015	17	14	48	31.12	29.1					6.7125	31.12	29.1
8	5	2015	17	20	48	31.52	29.1					6.71667	31.52	29.1
8	5	2015	17	26	48	31.52	29.5					6.72083	31.52	29.5
8	5	2015	17	32	48	31.52	29.5					6.725	31.52	29.5
8	5	2015	17	38	48	31.52	29.5					6.72917	31.52	29.5
8	5	2015	17	44	48	31.52	29.5					6.73333	31.52	29.5
8	5	2015	17	50	48	31.52	29.1					6.7375	31.52	29.1
8	5	2015	17	56	48	31.52	29.1					6.74167	31.52	29.1
8	5	2015	18	2	48	31.52	28.7					6.74583	31.52	28.7
8	5	2015	18	8	48	31.52	28.7					6.75	31.52	28.7
8	5	2015	18	14	48	31.52	28.7					6.75417	31.52	28.7
8	5	2015	18	20	48	31.52	28.7					6.75833	31.52	28.7
8	5	2015	18	26	48	31.52	28.7					6.7625	31.52	28.7
8	5	2015	18	32	48	31.52	28.7					6.76667	31.52	28.7
8	5	2015	18	38	48	31.12	28.31					6.77083	31.12	28.31
8	5	2015	18	44	48	31.12	27.91					6.775	31.12	27.91
8	5	2015	18	50	48	31.12	27.91					6.77917	31.12	27.91
8	5	2015	18	56	48	31.12	28.31					6.78333	31.12	28.31
8	5	2015	19	2	48	31.12	27.91					6.7875	31.12	27.91
8	5	2015	19	8	48	31.12	27.52					6.79167	31.12	27.52
8	5	2015	19	14	48	31.12	27.52					6.79583	31.12	27.52
8	5	2015	19	20	48	30.71	27.52					6.8	30.71	27.52
8	5	2015	19	26	48	30.71	27.12					6.80417	30.71	27.12
8	5	2015	19	32	48	30.71	27.12					6.80833	30.71	27.12
8	5	2015	19	38	48	30.71	27.12					6.8125	30.71	27.12
8	5	2015	19	44	48	30.71	27.12					6.81667	30.71	27.12
8	5	2015	19	50	48	30.31	26.73					6.82083	30.31	26.73
8	5	2015	19	56	48	30.31	26.73					6.825	30.31	26.73
8	5	2015	20	2	48	30.31	26.73					6.82917	30.31	26.73
8	5	2015	20	8	48	30.31	26.34					6.83333	30.31	26.34
8	5	2015	20	14	48	29.9	26.34					6.8375	29.9	26.34
8	5	2015	20	20	48	29.9	25.95					6.84167	29.9	25.95
8	5	2015	20	26	48	29.9	25.95					6.84583	29.9	25.95
8	5	2015	20	32	48	29.5	25.56					6.85	29.5	25.56
8	5	2015	20	38	48	29.5	25.17					6.85417	29.5	25.17
8	5	2015	20	44	48	29.5	25.17					6.85833	29.5	25.17
8	5	2015	20	50	48	29.5	24.79					6.8625	29.5	24.79
8	5	2015	20	56	48	29.1	24.79					6.86667	29.1	24.79
8	5	2015	21	2	48	29.1	24.79					6.87083	29.1	24.79
8	5	2015	21	8	48	29.1	24.4					6.875	29.1	24.4
8	5	2015	21	14	48	28.7	24.4					6.87917	28.7	24.4
8	5	2015	21	20	48	28.7	24.4					6.88333	28.7	24.4
8	5	2015	21	26	48	28.7	24.01					6.8875	28.7	24.01
8	5	2015	21	32	48	28.7	24.01					6.89167	28.7	24.01
8	5	2015	21	38	48	28.31	23.63					6.89583	28.31	23.63
8	5	2015	21	44	48	28.31	24.01					6.9	28.31	24.01
8	5	2015	21	50	48	28.31	23.63					6.90417	28.31	23.63
8	5	2015	21	56	48	27.91	23.63					6.90833	27.91	23.63
8	5	2015	22	2	48	27.91	23.63					6.9125	27.91	23.63
8	5	2015	22	8	48	27.91	22.86					6.91667	27.91	22.86
8	5	2015	22	14	48	27.91	23.24					6.92083	27.91	23.24
8	5	2015	22	20	48	27.52	22.86					6.925	27.52	22.86
8	5	2015	22	26	48	27.52	22.86					6.92917	27.52	22.86
8	5	2015	22	32	48	27.52	22.86					6.93333	27.52	22.86
8	5	2015	22	38	48	27.52	22.48					6.9375	27.52	22.48
8	5	2015	22	44	48	27.12	22.48					6.94167	27.12	22.48
8	5	2015	22	50	48	27.12	22.48					6.94583	27.12	22.48
8	5	2015	22	56	48	27.12	22.48					6.95	27.12	22.48
8	5	2015	23	2	48	27.12	22.48					6.95417	27.12	22.48
8	5	2015	23	8	48	26.73	22.86					6.95833	26.73	22.86
8	5	2015	23	14	48	26.73	22.86					6.9625	26.73	22.86
8	5	2015	23	20	48	26.73	23.24					6.96667	26.73	23.24
8	5	2015	23	26	48	26.73	23.24					6.97083	26.73	23.24
8	5	2015	23	32	48	26.34	23.24					6.975	26.34	23.24
8	5	2015	23	38	48	26.34	22.86					6.97917	26.34	22.86
8	5	2015	23	44	48	26.34	22.86					6.98333	26.34	22.86
8	5	2015	23	50	48	26.34	22.86					6.9875	26.34	22.86
8	5	2015	23	56	48	26.34	22.86					6.99167	26.34	22.86
8	6	2015	0	2	48	25.95	22.86					6.99583	25.95	22.86
8	6	2015	0	8	48	25.95	22.86					7	25.95	22.86
8	6	2015	0	14	48	25.95	22.86					7.00417	25.95	22.86
8	6	2015	0	20	48	25.95	22.86					7.00833	25.95	22.86
8	6	2015	0	26	48	25.95	22.86					7.0125	25.95	22.86
8	6	2015	0	32	48	25.56	22.48					7.01667	25.56	22.48
8	6	2015	0	38	48	25.56	22.86					7.02083	25.56	22.86
8	6	2015	0	44	48	25.56	22.48					7.025	25.56	22.48
8	6	2015	0	50	48	25.56	22.48					7.02917	25.56	22.48
8	6	2015	0	56	48	25.56	22.09					7.03333	25.56	22.09
8	6	2015	1	2	48	25.56	22.09					7.0375	25.56	22.09
8	6	2015	1	8	48	25.17	22.09					7.04167	25.17	22.09
8	6	2015	1	14	48	25.17	22.09					7.04583	25.17	22.09
8	6	2015	1	20	48	25.17	22.09					7.05	25.17	22.09
8	6	2015	1	26	48	25.17	22.09					7.05417	25.17	22.09
8	6	2015	1	32	48	25.17	22.09					7.05833	25.17	22.09
8	6	2015	1	38	48	25.17	21.71					7.0625	25.17	21.71
8	6	2015	1	44	48	24.79	21.71					7.06667	24.79	21.71
8	6	2015	1	50	48	24.79	21.33					7.07083	24.79	21.33
8	6	2015	1	56	48	24.79	20.95					7.075	24.79	20.95
8	6	2015	2	2	48	24.79	21.33					7.07917	24.79	21.33
8	6	2015	2	8	48	24.79	20.95					7.08333	24.79	20.95
8	6	2015	2	14	48	24.79	20.57					7.0875	24.79	20.57
8	6	2015	2	20	48	24.4	20.57					7.09167	24.4	20.57
8	6	2015	2	26	48	24.4	20.57					7.09583	24.4	20.57
8	6	2015	2	32	48	24.4	20.95					7.1	24.4	20.95
8	6	2015	2	38	48	24.4	20.57					7.10417	24.4	20.57
8	6	2015	2	44	48	24.4	20.19					7.10833	24.4	20.19
8	6	2015	2	50	48	24.4	20.19					7.1125	24.4	20.19
8	6	2015	2	56	48	24.01	20.19					7.11667	24.01	20.19
8	6	2015	3	2	48	24.01	20.19					7.12083	24.01	20.19
8	6	2015	3	8	48	24.01	20.19					7.125	24.01	20.19
8	6	2015	3	14	48	24.01	20.19					7.12917	24.01	20.19
8	6	2015	3	20	48	24.01	19.81					7.13333	24.01	19.81
8	6	2015	3	26	48	24.01	19.81					7.1375	24.01	19.81
8	6	2015	3	32	48	24.01	19.81					7.14167	24.01	19.81
8	6	2015	3	38	48	23.63	20.19					7.14583	23.63	20.19
8	6	2015	3	44	48	23.63	20.57					7.15	23.63	20.57
8	6	2015	3	50	48	23.63	20.19					7.15417	23.63	20.19
8	6	2015	3	56	48	23.63	20.57					7.15833	23.63	20.57
8	6	2015	4	2	48	23.63	20.19					7.1625	23.63	20.19
8	6	2015	4	8	48	23.63	20.19					7.16667	23.63	20.19
8	6	2015	4	14	48	23.63	19.81					7.17083	23.63	19.81
8	6	2015	4	20	48	23.63	20.19					7.175	23.63	20.19
8	6	2015	4	26	48	23.24	19.81					7.17917	23.24	19.81
8	6	2015	4	32	48	23.24	19.81					7.18333	23.24	19.81
8	6	2015	4	38	48	23.24	19.42					7.1875	23.24	19.42
8	6	2015	4	44	48	23.24	19.42					7.19167	23.24	19.42
8	6	2015	4	50	48	23.24	19.42					7.19583	23.24	19.42
8	6	2015	4	56	48	23.24	19.42					7.2	23.24	19.42
8	6	2015	5	2	48	23.24	19.42					7.20417	23.24	19.42
8	6	2015	5	8	48	23.24	19.04					7.20833	23.24	19.04
8	6	2015	5	14	48	23.24	19.81					7.2125	23.24	19.81
8	6	2015	5	20	48	22.86	19.42					7.21667	22.86	19.42
8	6	2015	5	26	48	22.86	19.04					7.22083	22.86	19.04
8	6	2015	5	32	48	22.86	19.04					7.225	22.86	19.04
8	6	2015	5	38	48	22.86	18.66					7.22917	22.86	18.66
8	6	2015	5	44	48	22.86	18.28					7.23333	22.86	18.28
8	6	2015	5	50	48	22.86	19.04					7.2375	22.86	19.04
8	6	2015	5	56	48	22.86	19.04					7.24167	22.86	19.04
8	6	2015	6	2	48	22.48	19.04					7.24583	22.48	19.04
8	6	2015	6	8	48	22.48	18.66					7.25	22.48	18.66
8	6	2015	6	14	48	22.48	19.04					7.25417	22.48	19.04
8	6	2015	6	20	48	22.48	19.04					7.25833	22.48	19.04
8	6	2015	6	26	48	22.48	19.42					7.2625	22.48	19.42
8	6	2015	6	32	48	22.48	19.81					7.26667	22.48	19.81
8	6	2015	6	38	48	22.48	19.42					7.27083	22.48	19.42
8	6	2015	6	44	48	22.48	19.42					7.275	22.48	19.42
8	6	2015	6	50	48	22.48	19.42					7.27917	22.48	19.42
8	6	2015	6	56	48	22.48	19.81					7.28333	22.48	19.81
8	6	2015	7	2	48	22.09	19.81					7.2875	22.09	19.81
8	6	2015	7	8	48	22.09	20.19					7.29167	22.09	20.19
8	6	2015	7	14	48	22.09	20.57					7.29583	22.09	20.57
8	6	2015	7	20	48	22.09	20.57					7.3	22.09	20.57
8	6	2015	7	26	48	22.09	20.95					7.30417	22.09	20.95
8	6	2015	7	32	48	22.09	20.95					7.30833	22.09	20.95
8	6	2015	7	38	48	22.09	20.95					7.3125	22.09	20.95
8	6	2015	7	44	48	22.09	20.95					7.31667	22.09	20.95
8	6	2015	7	50	48	22.09	21.33					7.32083	22.09	21.33
8	6	2015	7	56	48	22.09	21.71					7.325	22.09	21.71
8	6	2015	8	2	48	22.09	22.09					7.32917	22.09	22.09
8	6	2015	8	8	48	22.09	22.09					7.33333	22.09	22.09
8	6	2015	8	14	48	22.48	22.09					7.3375	22.48	22.09
8	6	2015	8	20	48	22.48	22.48					7.34167	22.48	22.48
8	6	2015	8	26	48	22.48	22.86					7.34583	22.48	22.86
8	6	2015	8	32	48	22.48	23.24					7.35	22.48	23.24
8	6	2015	8	38	48	22.48	23.63					7.35417	22.48	23.63
8	6	2015	8	44	48	22.48	23.63					7.35833	22.48	23.63
8	6	2015	8	50	48	22.86	24.4					7.3625	22.86	24.4
8	6	2015	8	56	48	22.86	24.4					7.36667	22.86	24.4
8	6	2015	9	2	48	22.86	25.17					7.37083	22.86	25.17
8	6	2015	9	8	48	22.86	25.17					7.375	22.86	25.17
8	6	2015	9	14	48	23.24	25.95					7.37917	23.24	25.95
8	6	2015	9	20	48	23.24	26.34					7.38333	23.24	26.34
8	6	2015	9	26	48	23.24	26.34					7.3875	23.24	26.34
8	6	2015	9	32	48	23.63	26.34					7.39167	23.63	26.34
8	6	2015	9	38	48	23.63	26.73					7.39583	23.63	26.73
8	6	2015	9	44	48	23.63	27.12					7.4	23.63	27.12
8	6	2015	9	50	48	24.01	28.7					7.40417	24.01	28.7
8	6	2015	9	56	48	24.01	28.7					7.40833	24.01	28.7
8	6	2015	10	2	48	24.01	29.5					7.4125	24.01	29.5
8	6	2015	10	8	48	24.4	29.9					7.41667	24.4	29.9
8	6	2015	10	14	48	24.4	30.31					7.42083	24.4	30.31
8	6	2015	10	20	48	24.4	31.12					7.425	24.4	31.12
8	6	2015	10	26	48	24.79	31.52					7.42917	24.79	31.52
8	6	2015	10	32	48	24.79	31.93					7.43333	24.79	31.93
8	6	2015	10	38	48	25.17	33.59					7.4375	25.17	33.59
8	6	2015	10	44	48	25.17	33.17					7.44167	25.17	33.17
8	6	2015	10	50	48	25.56	35.7					7.44583	25.56	35.7
8	6	2015	10	56	48	25.56	41.52					7.45	25.56	41.52
8	6	2015	11	2	48	25.95	45.39					7.45417	25.95	45.39
8	6	2015	11	8	48	25.95	44.89					7.45833	25.95	44.89
8	6	2015	11	14	48	26.34	46.91					7.4625	26.34	46.91
8	6	2015	11	20	48	26.34	46.4					7.46667	26.34	46.4
8	6	2015	11	26	48	26.34	44.4					7.47083	26.34	44.4
8	6	2015	11	32	48	26.73	40.13					7.475	26.73	40.13
8	6	2015	11	38	48	26.73	37					7.47917	26.73	37
8	6	2015	11	44	48	26.73	35.27					7.48333	26.73	35.27
8	6	2015	11	50	48	27.12	33.59					7.4875	27.12	33.59
8	6	2015	11	56	48	27.12	35.27					7.49167	27.12	35.27
8	6	2015	12	2	48	27.52	34.85					7.49583	27.52	34.85
8	6	2015	12	8	48	27.52	34.85					7.5	27.52	34.85
8	6	2015	12	14	48	27.91	34.43					7.50417	27.91	34.43
8	6	2015	12	20	48	27.91	34.43					7.50833	27.91	34.43
8	6	2015	12	26	48	27.91	34.43					7.5125	27.91	34.43
8	6	2015	12	32	48	28.31	34.01					7.51667	28.31	34.01
8	6	2015	12	38	48	28.31	34.43					7.52083	28.31	34.43
8	6	2015	12	44	48	28.7	34.43					7.525	28.7	34.43
8	6	2015	12	50	48	28.7	35.27					7.52917	28.7	35.27
8	6	2015	12	56	48	29.1	35.7					7.53333	29.1	35.7
8	6	2015	13	2	48	29.1	34.85					7.5375	29.1	34.85
8	6	2015	13	8	48	29.5	35.27					7.54167	29.5	35.27
8	6	2015	13	14	48	29.5	34.85					7.54583	29.5	34.85
8	6	2015	13	20	48	29.9	34.01					7.55	29.9	34.01
8	6	2015	13	26	48	29.9	35.27					7.55417	29.9	35.27
8	6	2015	13	32	48	30.31	35.27					7.55833	30.31	35.27
8	6	2015	13	38	48	30.31	34.43					7.5625	30.31	34.43
8	6	2015	13	44	48	30.71	34.85					7.56667	30.71	34.85
8	6	2015	13	50	48	30.71	34.43					7.57083	30.71	34.43
8	6	2015	13	56	48	31.12	33.59					7.575	31.12	33.59
8	6	2015	14	2	48	31.12	33.59					7.57917	31.12	33.59
8	6	2015	14	8	48	31.12	34.01					7.58333	31.12	34.01
8	6	2015	14	14	48	31.52	33.59					7.5875	31.52	33.59
8	6	2015	14	20	48	31.52	33.59					7.59167	31.52	33.59
8	6	2015	14	26	48	31.52	34.01					7.59583	31.52	34.01
8	6	2015	14	32	48	31.52	34.01					7.6	31.52	34.01
8	6	2015	14	38	48	31.52	34.01					7.60417	31.52	34.01
8	6	2015	14	44	48	31.52	34.43					7.60833	31.52	34.43
8	6	2015	14	50	48	31.93	33.59					7.6125	31.93	33.59
8	6	2015	14	56	48	31.93	33.59					7.61667	31.93	33.59
8	6	2015	15	2	48	31.93	33.59					7.62083	31.93	33.59
8	6	2015	15	8	48	31.93	33.17					7.625	31.93	33.17
8	6	2015	15	14	48	31.93	33.59					7.62917	31.93	33.59
8	6	2015	15	20	48	31.93	34.01					7.63333	31.93	34.01
8	6	2015	15	26	48	31.93	33.59					7.6375	31.93	33.59
8	6	2015	15	32	48	31.93	32.76					7.64167	31.93	32.76
8	6	2015	15	38	48	32.34	33.59					7.64583	32.34	33.59
8	6	2015	15	44	48	32.34	33.17					7.65	32.34	33.17
8	6	2015	15	50	48	32.34	33.17					7.65417	32.34	33.17
8	6	2015	15	56	48	32.34	33.17					7.65833	32.34	33.17
8	6	2015	16	2	48	32.34	33.17					7.6625	32.34	33.17
8	6	2015	16	8	48	32.76	33.17					7.66667	32.76	33.17
8	6	2015	16	14	48	32.76	33.17					7.67083	32.76	33.17
8	6	2015	16	20	48	32.76	32.34					7.675	32.76	32.34
8	6	2015	16	26	48	32.76	32.76					7.67917	32.76	32.76
8	6	2015	16	32	48	32.76	32.34					7.68333	32.76	32.34
8	6	2015	16	38	48	32.76	32.76					7.6875	32.76	32.76
8	6	2015	16	44	48	32.76	32.76					7.69167	32.76	32.76
8	6	2015	16	50	48	32.76	32.76					7.69583	32.76	32.76
8	6	2015	16	56	48	32.76	31.93					7.7	32.76	31.93
8	6	2015	17	2	48	32.76	31.93					7.70417	32.76	31.93
8	6	2015	17	8	48	32.76	31.52					7.70833	32.76	31.52
8	6	2015	17	14	48	32.76	31.93					7.7125	32.76	31.93
8	6	2015	17	20	48	32.76	32.34					7.71667	32.76	32.34
8	6	2015	17	26	48	32.76	31.93					7.72083	32.76	31.93
8	6	2015	17	32	48	32.76	32.34					7.725	32.76	32.34
8	6	2015	17	38	48	32.76	31.93					7.72917	32.76	31.93
8	6	2015	17	44	48	33.17	31.93					7.73333	33.17	31.93
8	6	2015	17	50	48	32.76	31.52					7.7375	32.76	31.52
8	6	2015	17	56	48	33.17	31.52					7.74167	33.17	31.52
8	6	2015	18	2	48	32.76	31.12					7.74583	32.76	31.12
8	6	2015	18	8	48	32.76	31.12					7.75	32.76	31.12
8	6	2015	18	14	48	32.76	30.71					7.75417	32.76	30.71
8	6	2015	18	20	48	32.76	30.71					7.75833	32.76	30.71
8	6	2015	18	26	48	32.76	30.71					7.7625	32.76	30.71
8	6	2015	18	32	48	32.76	30.31					7.76667	32.76	30.31
8	6	2015	18	38	48	32.76	30.71					7.77083	32.76	30.71
8	6	2015	18	44	48	32.76	30.71					7.775	32.76	30.71
8	6	2015	18	50	48	32.34	30.71					7.77917	32.34	30.71
8	6	2015	18	56	48	32.34	30.71					7.78333	32.34	30.71
8	6	2015	19	2	48	32.34	30.31					7.7875	32.34	30.31
8	6	2015	19	8	48	32.34	30.31					7.79167	32.34	30.31
8	6	2015	19	14	48	32.34	29.9					7.79583	32.34	29.9
8	6	2015	19	20	48	31.93	29.9					7.8	31.93	29.9
8	6	2015	19	26	48	31.93	29.9					7.80417	31.93	29.9
8	6	2015	19	32	48	31.93	29.5					7.80833	31.93	29.5
8	6	2015	19	38	48	31.93	29.5					7.8125	31.93	29.5
8	6	2015	19	44	48	31.52	29.1					7.81667	31.52	29.1
8	6	2015	19	50	48	31.52	29.1					7.82083	31.52	29.1
8	6	2015	19	56	48	31.52	29.1					7.825	31.52	29.1
8	6	2015	20	2	48	31.52	29.1					7.82917	31.52	29.1
8	6	2015	20	8	48	31.12	28.7					7.83333	31.12	28.7
8	6	2015	20	14	48	31.12	28.31					7.8375	31.12	28.31
8	6	2015	20	20	48	31.12	27.91					7.84167	31.12	27.91
8	6	2015	20	26	48	31.12	27.91					7.84583	31.12	27.91
8	6	2015	20	32	48	30.71	27.52					7.85	30.71	27.52
8	6	2015	20	38	48	30.71	27.91					7.85417	30.71	27.91
8	6	2015	20	44	48	30.71	27.52					7.85833	30.71	27.52
8	6	2015	20	50	48	30.71	27.12					7.8625	30.71	27.12
8	6	2015	20	56	48	30.31	26.73					7.86667	30.31	26.73
8	6	2015	21	2	48	30.31	26.34					7.87083	30.31	26.34
8	6	2015	21	8	48	30.31	26.34					7.875	30.31	26.34
8	6	2015	21	14	48	30.31	25.95					7.87917	30.31	25.95
8	6	2015	21	20	48	29.9	25.56					7.88333	29.9	25.56
8	6	2015	21	26	48	29.9	25.17					7.8875	29.9	25.17
8	6	2015	21	32	48	29.9	25.56					7.89167	29.9	25.56
8	6	2015	21	38	48	29.9	25.17					7.89583	29.9	25.17
8	6	2015	21	44	48	29.5	24.79					7.9	29.5	24.79
8	6	2015	21	50	48	29.5	24.79					7.90417	29.5	24.79
8	6	2015	21	56	48	29.5	24.4					7.90833	29.5	24.4
8	6	2015	22	2	48	29.5	24.4					7.9125	29.5	24.4
8	6	2015	22	8	48	29.1	24.4					7.91667	29.1	24.4
8	6	2015	22	14	48	29.1	24.01					7.92083	29.1	24.01
8	6	2015	22	20	48	29.1	24.01					7.925	29.1	24.01
8	6	2015	22	26	48	29.1	24.01					7.92917	29.1	24.01
8	6	2015	22	32	48	28.7	24.01					7.93333	28.7	24.01
8	6	2015	22	38	48	28.7	23.63					7.9375	28.7	23.63
8	6	2015	22	44	48	28.7	23.24					7.94167	28.7	23.24
8	6	2015	22	50	48	28.7	23.24					7.94583	28.7	23.24
8	6	2015	22	56	48	28.31	23.24					7.95	28.31	23.24
8	6	2015	23	2	48	28.31	23.63					7.95417	28.31	23.63
8	6	2015	23	8	48	28.31	23.63					7.95833	28.31	23.63
8	6	2015	23	14	48	28.31	23.24					7.9625	28.31	23.24
8	6	2015	23	20	48	27.91	22.86					7.96667	27.91	22.86
8	6	2015	23	26	48	27.91	23.24					7.97083	27.91	23.24
8	6	2015	23	32	48	27.91	23.63					7.975	27.91	23.63
8	6	2015	23	38	48	27.91	24.01					7.97917	27.91	24.01
8	6	2015	23	44	48	27.91	23.63					7.98333	27.91	23.63
8	6	2015	23	50	48	27.52	23.24					7.9875	27.52	23.24
8	6	2015	23	56	48	27.52	22.86					7.99167	27.52	22.86
8	7	2015	0	2	48	27.52	22.86					7.99583	27.52	22.86
8	7	2015	0	8	48	27.52	22.48					8	27.52	22.48
8	7	2015	0	14	48	27.52	22.48					8.00417	27.52	22.48
8	7	2015	0	20	48	27.12	22.48					8.00833	27.12	22.48
8	7	2015	0	26	48	27.12	22.48					8.0125	27.12	22.48
8	7	2015	0	32	48	27.12	22.48					8.01667	27.12	22.48
8	7	2015	0	38	48	27.12	22.48					8.02083	27.12	22.48
8	7	2015	0	44	48	27.12	22.09					8.025	27.12	22.09
8	7	2015	0	50	48	26.73	22.09					8.02917	26.73	22.09
8	7	2015	0	56	48	26.73	21.71					8.03333	26.73	21.71
8	7	2015	1	2	48	26.73	21.71					8.0375	26.73	21.71
8	7	2015	1	8	48	26.73	21.71					8.04167	26.73	21.71
8	7	2015	1	14	48	26.73	21.71					8.04583	26.73	21.71
8	7	2015	1	20	48	26.34	21.71					8.05	26.34	21.71
8	7	2015	1	26	48	26.34	21.71					8.05417	26.34	21.71
8	7	2015	1	32	48	26.34	21.71					8.05833	26.34	21.71
8	7	2015	1	38	48	26.34	22.09					8.0625	26.34	22.09
8	7	2015	1	44	48	26.34	22.09					8.06667	26.34	22.09
8	7	2015	1	50	48	26.34	21.71					8.07083	26.34	21.71
8	7	2015	1	56	48	25.95	21.33					8.075	25.95	21.33
8	7	2015	2	2	48	25.95	21.33					8.07917	25.95	21.33
8	7	2015	2	8	48	25.95	21.33					8.08333	25.95	21.33
8	7	2015	2	14	48	25.95	21.33					8.0875	25.95	21.33
8	7	2015	2	20	48	25.95	21.33					8.09167	25.95	21.33
8	7	2015	2	26	48	25.56	20.95					8.09583	25.56	20.95
8	7	2015	2	32	48	25.56	20.95					8.1	25.56	20.95
8	7	2015	2	38	48	25.56	21.33					8.10417	25.56	21.33
8	7	2015	2	44	48	25.56	21.71					8.10833	25.56	21.71
8	7	2015	2	50	48	25.56	21.71					8.1125	25.56	21.71
8	7	2015	2	56	48	25.56	21.33					8.11667	25.56	21.33
8	7	2015	3	2	48	25.56	20.95					8.12083	25.56	20.95
8	7	2015	3	8	48	25.17	21.33					8.125	25.17	21.33
8	7	2015	3	14	48	25.17	20.95					8.12917	25.17	20.95
8	7	2015	3	20	48	25.17	21.33					8.13333	25.17	21.33
8	7	2015	3	26	48	25.17	20.95					8.1375	25.17	20.95
8	7	2015	3	32	48	25.17	20.57					8.14167	25.17	20.57
8	7	2015	3	38	48	25.17	20.57					8.14583	25.17	20.57
8	7	2015	3	44	48	25.17	20.57					8.15	25.17	20.57
8	7	2015	3	50	48	24.79	20.19					8.15417	24.79	20.19
8	7	2015	3	56	48	24.79	20.19					8.15833	24.79	20.19
8	7	2015	4	2	48	24.79	20.57					8.1625	24.79	20.57
8	7	2015	4	8	48	24.79	20.57					8.16667	24.79	20.57
8	7	2015	4	14	48	24.79	20.57					8.17083	24.79	20.57
8	7	2015	4	20	48	24.79	20.19					8.175	24.79	20.19
8	7	2015	4	26	48	24.4	19.81					8.17917	24.4	19.81
8	7	2015	4	32	48	24.4	19.81					8.18333	24.4	19.81
8	7	2015	4	38	48	24.4	19.81					8.1875	24.4	19.81
8	7	2015	4	44	48	24.4	19.81					8.19167	24.4	19.81
8	7	2015	4	50	48	24.4	19.42					8.19583	24.4	19.42
8	7	2015	4	56	48	24.4	19.42					8.2	24.4	19.42
8	7	2015	5	2	48	24.01	19.42					8.20417	24.01	19.42
8	7	2015	5	8	48	24.01	19.42					8.20833	24.01	19.42
8	7	2015	5	14	48	24.01	19.42					8.2125	24.01	19.42
8	7	2015	5	20	48	24.01	19.04					8.21667	24.01	19.04
8	7	2015	5	26	48	24.01	19.42					8.22083	24.01	19.42
8	7	2015	5	32	48	24.01	19.81					8.225	24.01	19.81
8	7	2015	5	38	48	24.01	20.19					8.22917	24.01	20.19
8	7	2015	5	44	48	23.63	20.19					8.23333	23.63	20.19
8	7	2015	5	50	48	23.63	20.19					8.2375	23.63	20.19
8	7	2015	5	56	48	23.63	19.81					8.24167	23.63	19.81
8	7	2015	6	2	48	23.63	19.42					8.24583	23.63	19.42
8	7	2015	6	8	48	23.63	19.42					8.25	23.63	19.42
8	7	2015	6	14	48	23.63	19.81					8.25417	23.63	19.81
8	7	2015	6	20	48	23.63	19.81					8.25833	23.63	19.81
8	7	2015	6	26	48	23.24	20.19					8.2625	23.24	20.19
8	7	2015	6	32	48	23.24	20.19					8.26667	23.24	20.19
8	7	2015	6	38	48	23.24	20.57					8.27083	23.24	20.57
8	7	2015	6	44	48	23.24	20.57					8.275	23.24	20.57
8	7	2015	6	50	48	23.24	20.57					8.27917	23.24	20.57
8	7	2015	6	56	48	23.24	20.95					8.28333	23.24	20.95
8	7	2015	7	2	48	23.24	21.33					8.2875	23.24	21.33
8	7	2015	7	8	48	23.24	21.33					8.29167	23.24	21.33
8	7	2015	7	14	48	23.24	21.33					8.29583	23.24	21.33
8	7	2015	7	20	48	23.24	21.71					8.3	23.24	21.71
8	7	2015	7	26	48	23.24	21.71					8.30417	23.24	21.71
8	7	2015	7	32	48	23.24	22.09					8.30833	23.24	22.09
8	7	2015	7	38	48	23.24	22.09					8.3125	23.24	22.09
8	7	2015	7	44	48	23.24	22.48					8.31667	23.24	22.48
8	7	2015	7	50	48	23.24	22.48					8.32083	23.24	22.48
8	7	2015	7	56	48	23.24	22.86					8.325	23.24	22.86
8	7	2015	8	2	48	23.24	23.24					8.32917	23.24	23.24
8	7	2015	8	8	48	23.24	23.24					8.33333	23.24	23.24
8	7	2015	8	14	48	23.24	23.63					8.3375	23.24	23.63
8	7	2015	8	20	48	23.24	23.63					8.34167	23.24	23.63
8	7	2015	8	26	48	23.63	24.01					8.34583	23.63	24.01
8	7	2015	8	32	48	23.63	24.4					8.35	23.63	24.4
8	7	2015	8	38	48	23.63	24.79					8.35417	23.63	24.79
8	7	2015	8	44	48	23.63	25.17					8.35833	23.63	25.17
8	7	2015	8	50	48	23.63	25.56					8.3625	23.63	25.56
8	7	2015	8	56	48	24.01	25.56					8.36667	24.01	25.56
8	7	2015	9	2	48	24.01	26.34					8.37083	24.01	26.34
8	7	2015	9	8	48	24.01	26.34					8.375	24.01	26.34
8	7	2015	9	14	48	24.4	26.73					8.37917	24.4	26.73
8	7	2015	9	20	48	24.4	27.52					8.38333	24.4	27.52
8	7	2015	9	26	48	24.4	27.12					8.3875	24.4	27.12
8	7	2015	9	32	48	24.79	27.52					8.39167	24.79	27.52
8	7	2015	9	38	48	24.79	27.91					8.39583	24.79	27.91
8	7	2015	9	44	48	25.17	28.31					8.4	25.17	28.31
8	7	2015	9	50	48	25.17	29.5					8.40417	25.17	29.5
8	7	2015	9	56	48	25.17	30.31					8.40833	25.17	30.31
8	7	2015	10	2	48	25.56	30.71					8.4125	25.56	30.71
8	7	2015	10	8	48	25.56	31.12					8.41667	25.56	31.12
8	7	2015	10	14	48	25.95	31.93					8.42083	25.95	31.93
8	7	2015	10	20	48	25.95	32.34					8.425	25.95	32.34
8	7	2015	10	26	48	26.34	33.59					8.42917	26.34	33.59
8	7	2015	10	32	48	26.34	34.43					8.43333	26.34	34.43
8	7	2015	10	38	48	26.73	36.57					8.4375	26.73	36.57
8	7	2015	10	44	48	26.73	34.85					8.44167	26.73	34.85
8	7	2015	10	50	48	27.12	37.88					8.44583	27.12	37.88
8	7	2015	10	56	48	27.12	44.89					8.45	27.12	44.89
8	7	2015	11	2	48	27.12	49.02					8.45417	27.12	49.02
8	7	2015	11	8	48	27.52	50.11					8.45833	27.52	50.11
8	7	2015	11	14	48	27.52	49.56					8.4625	27.52	49.56
8	7	2015	11	20	48	27.91	51.22					8.46667	27.91	51.22
8	7	2015	11	26	48	27.91	50.11					8.47083	27.91	50.11
8	7	2015	11	32	48	27.91	42.46					8.475	27.91	42.46
8	7	2015	11	38	48	28.31	40.13					8.47917	28.31	40.13
8	7	2015	11	44	48	28.31	37.88					8.48333	28.31	37.88
8	7	2015	11	50	48	28.7	38.32					8.4875	28.7	38.32
8	7	2015	11	56	48	28.7	37.88					8.49167	28.7	37.88
8	7	2015	12	2	48	29.1	39.22					8.49583	29.1	39.22
8	7	2015	12	8	48	29.1	37.88					8.5	29.1	37.88
8	7	2015	12	14	48	29.5	38.77					8.50417	29.5	38.77
8	7	2015	12	20	48	29.5	39.22					8.50833	29.5	39.22
8	7	2015	12	26	48	29.5	38.77					8.5125	29.5	38.77
8	7	2015	12	32	48	29.9	39.22					8.51667	29.9	39.22
8	7	2015	12	38	48	29.9	38.32					8.52083	29.9	38.32
8	7	2015	12	44	48	30.31	37					8.525	30.31	37
8	7	2015	12	50	48	30.31	35.7					8.52917	30.31	35.7
8	7	2015	12	56	48	30.71	35.27					8.53333	30.71	35.27
8	7	2015	13	2	48	30.71	35.27					8.5375	30.71	35.27
8	7	2015	13	8	48	30.71	36.13					8.54167	30.71	36.13
8	7	2015	13	14	48	31.12	37.44					8.54583	31.12	37.44
8	7	2015	13	20	48	31.12	37.44					8.55	31.12	37.44
8	7	2015	13	26	48	31.12	37					8.55417	31.12	37
8	7	2015	13	32	48	31.12	35.7					8.55833	31.12	35.7
8	7	2015	13	38	48	31.52	36.57					8.5625	31.52	36.57
8	7	2015	13	44	48	31.52	37					8.56667	31.52	37
8	7	2015	13	50	48	31.52	37					8.57083	31.52	37
8	7	2015	13	56	48	31.93	37.44					8.575	31.93	37.44
8	7	2015	14	2	48	31.93	37					8.57917	31.93	37
8	7	2015	14	8	48	31.93	37					8.58333	31.93	37
8	7	2015	14	14	48	32.34	35.7					8.5875	32.34	35.7
8	7	2015	14	20	48	32.34	35.27					8.59167	32.34	35.27
8	7	2015	14	26	48	32.76	36.57					8.59583	32.76	36.57
8	7	2015	14	32	48	32.76	36.13					8.6	32.76	36.13
8	7	2015	14	38	48	32.76	37.44					8.60417	32.76	37.44
8	7	2015	14	44	48	32.76	37					8.60833	32.76	37
8	7	2015	14	50	48	33.17	37					8.6125	33.17	37
8	7	2015	14	56	48	33.17	37					8.61667	33.17	37
8	7	2015	15	2	48	33.17	37.44					8.62083	33.17	37.44
8	7	2015	15	8	48	33.17	37.44					8.625	33.17	37.44
8	7	2015	15	14	48	33.59	37					8.62917	33.59	37
8	7	2015	15	20	48	33.59	36.57					8.63333	33.59	36.57
8	7	2015	15	26	48	33.59	36.57					8.6375	33.59	36.57
8	7	2015	15	32	48	34.01	36.13					8.64167	34.01	36.13
8	7	2015	15	38	48	34.01	36.13					8.64583	34.01	36.13
8	7	2015	15	44	48	34.01	36.13					8.65	34.01	36.13
8	7	2015	15	50	48	34.43	36.13					8.65417	34.43	36.13
8	7	2015	15	56	48	34.43	35.7					8.65833	34.43	35.7
8	7	2015	16	2	48	34.43	35.7					8.6625	34.43	35.7
8	7	2015	16	8	48	34.43	35.7					8.66667	34.43	35.7
8	7	2015	16	14	48	34.43	35.27					8.67083	34.43	35.27
8	7	2015	16	20	48	34.43	35.27					8.675	34.43	35.27
8	7	2015	16	26	48	34.43	35.7					8.67917	34.43	35.7
8	7	2015	16	32	48	34.43	35.27					8.68333	34.43	35.27
8	7	2015	16	38	48	34.85	35.27					8.6875	34.85	35.27
8	7	2015	16	44	48	34.85	34.85					8.69167	34.85	34.85
8	7	2015	16	50	48	34.85	35.27					8.69583	34.85	35.27
8	7	2015	16	56	48	34.85	34.85					8.7	34.85	34.85
8	7	2015	17	2	48	34.85	34.85					8.70417	34.85	34.85
8	7	2015	17	8	48	34.85	35.27					8.70833	34.85	35.27
8	7	2015	17	14	48	34.85	34.43					8.7125	34.85	34.43
8	7	2015	17	20	48	34.85	34.43					8.71667	34.85	34.43
8	7	2015	17	26	48	34.85	34.43					8.72083	34.85	34.43
8	7	2015	17	32	48	34.85	34.01					8.725	34.85	34.01
8	7	2015	17	38	48	35.27	34.01					8.72917	35.27	34.01
8	7	2015	17	44	48	35.27	34.01					8.73333	35.27	34.01
8	7	2015	17	50	48	35.27	34.01					8.7375	35.27	34.01
8	7	2015	17	56	48	34.85	33.59					8.74167	34.85	33.59
8	7	2015	18	2	48	34.85	33.59					8.74583	34.85	33.59
8	7	2015	18	8	48	34.85	33.59					8.75	34.85	33.59
8	7	2015	18	14	48	34.85	33.17					8.75417	34.85	33.17
8	7	2015	18	20	48	34.85	33.17					8.75833	34.85	33.17
8	7	2015	18	26	48	34.85	33.59					8.7625	34.85	33.59
8	7	2015	18	32	48	34.85	33.17					8.76667	34.85	33.17
8	7	2015	18	38	48	34.43	32.76					8.77083	34.43	32.76
8	7	2015	18	44	48	34.43	32.76					8.775	34.43	32.76
8	7	2015	18	50	48	34.43	32.76					8.77917	34.43	32.76
8	7	2015	18	56	48	34.43	33.17					8.78333	34.43	33.17
8	7	2015	19	2	48	34.01	32.34					8.7875	34.01	32.34
8	7	2015	19	8	48	34.01	31.93					8.79167	34.01	31.93
8	7	2015	19	14	48	34.01	31.93					8.79583	34.01	31.93
8	7	2015	19	20	48	34.01	32.34					8.8	34.01	32.34
8	7	2015	19	26	48	33.59	31.52					8.80417	33.59	31.52
8	7	2015	19	32	48	33.59	31.52					8.80833	33.59	31.52
8	7	2015	19	38	48	33.59	31.12					8.8125	33.59	31.12
8	7	2015	19	44	48	33.59	30.71					8.81667	33.59	30.71
8	7	2015	19	50	48	33.17	30.31					8.82083	33.17	30.31
8	7	2015	19	56	48	33.17	29.9					8.825	33.17	29.9
8	7	2015	20	2	48	33.17	29.9					8.82917	33.17	29.9
8	7	2015	20	8	48	33.17	29.5					8.83333	33.17	29.5
8	7	2015	20	14	48	32.76	29.5					8.8375	32.76	29.5
8	7	2015	20	20	48	32.76	29.1					8.84167	32.76	29.1
8	7	2015	20	26	48	32.76	28.7					8.84583	32.76	28.7
8	7	2015	20	32	48	32.76	28.31					8.85	32.76	28.31
8	7	2015	20	38	48	32.34	28.31					8.85417	32.34	28.31
8	7	2015	20	44	48	32.34	27.91					8.85833	32.34	27.91
8	7	2015	20	50	48	32.34	27.52					8.8625	32.34	27.52
8	7	2015	20	56	48	31.93	27.12					8.86667	31.93	27.12
8	7	2015	21	2	48	31.93	27.12					8.87083	31.93	27.12
8	7	2015	21	8	48	31.93	27.12					8.875	31.93	27.12
8	7	2015	21	14	48	31.93	27.12					8.87917	31.93	27.12
8	7	2015	21	20	48	31.52	26.73					8.88333	31.52	26.73
8	7	2015	21	26	48	31.52	26.73					8.8875	31.52	26.73
8	7	2015	21	32	48	31.52	26.73					8.89167	31.52	26.73
8	7	2015	21	38	48	31.12	27.12					8.89583	31.12	27.12
8	7	2015	21	44	48	31.12	26.73					8.9	31.12	26.73
8	7	2015	21	50	48	31.12	26.34					8.90417	31.12	26.34
8	7	2015	21	56	48	31.12	26.34					8.90833	31.12	26.34
8	7	2015	22	2	48	30.71	26.34					8.9125	30.71	26.34
8	7	2015	22	8	48	30.71	26.34					8.91667	30.71	26.34
8	7	2015	22	14	48	30.71	26.34					8.92083	30.71	26.34
8	7	2015	22	20	48	30.71	26.34					8.925	30.71	26.34
8	7	2015	22	26	48	30.31	26.34					8.92917	30.31	26.34
8	7	2015	22	32	48	30.31	26.34					8.93333	30.31	26.34
8	7	2015	22	38	48	30.31	26.34					8.9375	30.31	26.34
8	7	2015	22	44	48	30.31	26.34					8.94167	30.31	26.34
8	7	2015	22	50	48	29.9	26.34					8.94583	29.9	26.34
8	7	2015	22	56	48	29.9	25.95					8.95	29.9	25.95
8	7	2015	23	2	48	29.9	25.95					8.95417	29.9	25.95
8	7	2015	23	8	48	29.9	25.56					8.95833	29.9	25.56
8	7	2015	23	14	48	29.5	25.56					8.9625	29.5	25.56
8	7	2015	23	20	48	29.5	25.95					8.96667	29.5	25.95
8	7	2015	23	26	48	29.5	25.95					8.97083	29.5	25.95
8	7	2015	23	32	48	29.5	25.95					8.975	29.5	25.95
8	7	2015	23	38	48	29.1	26.34					8.97917	29.1	26.34
8	7	2015	23	44	48	29.1	26.34					8.98333	29.1	26.34
8	7	2015	23	50	48	29.1	25.95					8.9875	29.1	25.95
8	7	2015	23	56	48	29.1	25.17					8.99167	29.1	25.17
8	8	2015	0	2	48	28.7	25.17					8.99583	28.7	25.17
8	8	2015	0	8	48	28.7	25.56					9	28.7	25.56
8	8	2015	0	14	48	28.7	25.56					9.00417	28.7	25.56
8	8	2015	0	20	48	28.7	25.17					9.00833	28.7	25.17
8	8	2015	0	26	48	28.7	24.79					9.0125	28.7	24.79
8	8	2015	0	32	48	28.31	24.4					9.01667	28.31	24.4
8	8	2015	0	38	48	28.31	24.01					9.02083	28.31	24.01
8	8	2015	0	44	48	28.31	23.63					9.025	28.31	23.63
8	8	2015	0	50	48	28.31	23.63					9.02917	28.31	23.63
[truncated: 6,549 more rows]
